# Supplementary material
Source: publisher site journal article supplement (https://www.spandidos-publications.com/3159/downloadSupplementary)
Supplement: Supplementary file 1 [file downloadSupplementary]

## Sheet: Control-MTH-3-NGS
Table SI. Data of transcriptome sequencing on MTH‑3-treated MDA‑MB‑231 human breast adenocarcinoma cells was performed.
id	logFC	logCPM	PValue	FDR	GeneSymbol	KO	GO
ENSG00000165731	-7.55847	-0.0449717	9.93e-10	3.89e-08	RET	K05126	biological_process:MAPK cascade(GO:0000165);biological_process:ureteric bud development(GO:0001657);biological_process:neural crest cell migration(GO:0001755);biological_process:embryonic epithelial tube formation(GO:0001838);molecular_function:protein tyrosine kinase activity(GO:0004713);molecular_function:transmembrane receptor protein tyrosine kinase activity(GO:0004714);molecular_function:rec…
ENSG00000237797	-6.24158	-1.10872	1.92e-08	6.2e-07	RP11-472N13.3	_	_
ENSG00000181143	-5.78463	-1.41404	3.35e-05	0.000616266	MUC16	K16145	molecular_function:protein binding(GO:0005515);cellular_component:extracellular space(GO:0005615);cellular_component:Golgi lumen(GO:0005796);cellular_component:plasma membrane(GO:0005886);biological_process:cell adhesion(GO:0007155);cellular_component:integral component of membrane(GO:0016021);biological_process:O-glycan processing(GO:0016266);cellular_component:extrinsic component of membrane(GO…
ENSG00000179826	-5.65656	-1.50129	6.13e-06	0.000132002	MRGPRX3	K08396	molecular_function:G-protein coupled receptor activity(GO:0004930);cellular_component:plasma membrane(GO:0005886);cellular_component:integral component of membrane(GO:0016021)
ENSG00000178031	-5.6518	-1.50144	1.38e-05	0.00027635	ADAMTSL1	_	cellular_component:proteinaceous extracellular matrix(GO:0005578);molecular_function:metallopeptidase activity(GO:0008237);molecular_function:zinc ion binding(GO:0008270)
ENSG00000150893	-5.34504	-1.69344	9.61e-05	0.00159137	FREM2	_	biological_process:morphogenesis of an epithelium(GO:0002009);molecular_function:calcium ion binding(GO:0005509);cellular_component:basement membrane(GO:0005604);cellular_component:plasma membrane(GO:0005886);biological_process:cell communication(GO:0007154);biological_process:homophilic cell adhesion via plasma membrane adhesion molecules(GO:0007156);cellular_component:integral component of memb…
ENSG00000162591	-5.34232	-1.69363	0.000105899	0.00173554	MEGF6	_	molecular_function:calcium ion binding(GO:0005509);molecular_function:protein binding(GO:0005515);cellular_component:cellular_component(GO:0005575);cellular_component:extracellular region(GO:0005576);biological_process:biological_process(GO:0008150)
ENSG00000125810	-5.24711	-1.74629	0.000201875	0.00307702	CD93	K06702	molecular_function:complement component C1q binding(GO:0001849);molecular_function:receptor activity(GO:0004872);molecular_function:calcium ion binding(GO:0005509);molecular_function:protein binding(GO:0005515);cellular_component:plasma membrane(GO:0005886);biological_process:phagocytosis(GO:0006909);cellular_component:cell surface(GO:0009986);cellular_component:integral component of membrane(GO:…
ENSG00000165606	-5.17189	-1.79996	0.000669759	0.00893192	DRGX	K09452	biological_process:neuron migration(GO:0001764);molecular_function:sequence-specific DNA binding transcription factor activity(GO:0003700);cellular_component:nucleus(GO:0005634);biological_process:transcription, DNA-templated(GO:0006351);biological_process:multicellular organismal development(GO:0007275);biological_process:axon guidance(GO:0007411);biological_process:detection of chemical stimulu…
ENSG00000205592	-5.16156	-1.80031	0.00164244	0.0195049	MUC19	_	cellular_component:extracellular region(GO:0005576);cellular_component:Golgi lumen(GO:0005796);biological_process:O-glycan processing(GO:0016266);biological_process:post-translational protein modification(GO:0043687);biological_process:cellular protein metabolic process(GO:0044267)
ENSG00000267272	-5.1539	-1.8005	0.000348746	0.00500756	LINC01140	_	_
ENSG00000081479	-5.14848	-1.80061	0.00060059	0.00809713	LRP2	K06233	biological_process:retinoid metabolic process(GO:0001523);molecular_function:calcium ion binding(GO:0005509);molecular_function:protein binding(GO:0005515);cellular_component:lysosome(GO:0005764);cellular_component:endosome(GO:0005768);cellular_component:endoplasmic reticulum(GO:0005783);cellular_component:Golgi apparatus(GO:0005794);cellular_component:plasma membrane(GO:0005886);cellular_compone…
ENSG00000140798	-5.13035	-1.80086	0.0013207	0.0161852	ABCC12	K05672	molecular_function:ATP binding(GO:0005524);cellular_component:mitochondrion(GO:0005739);cellular_component:integral component of membrane(GO:0016021);molecular_function:ATPase activity, coupled to transmembrane movement of substances(GO:0042626)
ENSG00000179314	-5.06181	-1.85658	0.000920569	0.0117933	WSCD1	_	molecular_function:sulfotransferase activity(GO:0008146);cellular_component:integral component of membrane(GO:0016021)
ENSG00000103460	-5.05581	-1.85682	0.00112911	0.0141459	TOX3	_	molecular_function:chromatin binding(GO:0003682);molecular_function:protein binding(GO:0005515);cellular_component:nucleus(GO:0005634);biological_process:transcription, DNA-templated(GO:0006351);biological_process:apoptotic process(GO:0006915);molecular_function:estrogen response element binding(GO:0034056);molecular_function:protein homodimerization activity(GO:0042803);biological_process:negati…
ENSG00000259209	-5.05472	-1.85675	0.000707751	0.00937597	RP5-991G20.2	_	_
ENSG00000270503	-5.03028	-1.85731	0.00205588	0.023686	RP11-407N17.6	_	_
ENSG00000046889	-5.02253	-1.85741	0.00254187	0.0284339	PREX2	K17588	molecular_function:phospholipid binding(GO:0005543);biological_process:G-protein coupled receptor signaling pathway(GO:0007186);;molecular_function:Rac guanyl-nucleotide exchange factor activity(GO:0030676);biological_process:intracellular signal transduction(GO:0035556)
ENSG00000106952	-4.9561	-1.91551	0.00398837	0.0416721	TNFSF8	K05471	molecular_function:receptor binding(GO:0005102);molecular_function:cytokine activity(GO:0005125);molecular_function:tumor necrosis factor receptor binding(GO:0005164);cellular_component:extracellular space(GO:0005615);cellular_component:integral component of plasma membrane(GO:0005887);;biological_process:immune response(GO:0006955);biological_process:signal transduction(GO:0007165);biological_pr…
ENSG00000187288	-4.94155	-1.91572	0.0018612	0.0217459	CIDEC	_	molecular_function:molecular_function(GO:0003674);cellular_component:nucleus(GO:0005634);cellular_component:cytoplasm(GO:0005737);cellular_component:endoplasmic reticulum(GO:0005783);cellular_component:lipid particle(GO:0005811);cellular_component:cytosol(GO:0005829);cellular_component:focal adhesion(GO:0005925);biological_process:transcription, DNA-templated(GO:0006351);biological_process:regula…
ENSG00000230461	-4.93946	-1.91578	0.00134784	0.0164621	PROX1-AS1	_	_
ENSG00000102290	-4.93838	-1.9158	0.0035238	0.0374946	PCDH11X	K16498	molecular_function:calcium ion binding(GO:0005509);cellular_component:plasma membrane(GO:0005886);cellular_component:integral component of plasma membrane(GO:0005887);biological_process:homophilic cell adhesion via plasma membrane adhesion molecules(GO:0007156);biological_process:negative regulation of phosphatase activity(GO:0010923);cellular_component:integral component of membrane(GO:0016021)
ENSG00000153292	-4.93681	-1.91589	0.00146975	0.0176862	GPR110	K08453	molecular_function:G-protein coupled receptor activity(GO:0004930);cellular_component:nucleus(GO:0005634);cellular_component:nucleolus(GO:0005730);cellular_component:plasma membrane(GO:0005886);biological_process:G-protein coupled receptor signaling pathway(GO:0007186);biological_process:neuropeptide signaling pathway(GO:0007218);cellular_component:integral component of membrane(GO:0016021);cellu…
ENSG00000141338	-4.93244	-1.91597	0.00191516	0.0222597	ABCA8	K05650	molecular_function:ATP binding(GO:0005524);cellular_component:mitochondrial inner membrane(GO:0005743);cellular_component:plasma membrane(GO:0005886);biological_process:transport(GO:0006810);cellular_component:integral component of membrane(GO:0016021);molecular_function:ATPase activity(GO:0016887);molecular_function:ATPase activity, coupled to transmembrane movement of substances(GO:0042626);bio…
ENSG00000151067	-4.92196	-1.91605	0.00398837	0.0416721	CACNA1C	K04850	cellular_component:caveolar macromolecular signaling complex(GO:0002095);molecular_function:voltage-gated calcium channel activity(GO:0005245);molecular_function:protein binding(GO:0005515);molecular_function:calmodulin binding(GO:0005516);cellular_component:cytoplasm(GO:0005737);cellular_component:plasma membrane(GO:0005886);cellular_component:voltage-gated calcium channel complex(GO:0005891);bi…
ENSG00000114948	-4.92196	-1.91605	0.00398837	0.0416721	ADAM23	K06837	molecular_function:metalloendopeptidase activity(GO:0004222);molecular_function:integrin binding(GO:0005178);molecular_function:protein binding(GO:0005515);cellular_component:extracellular region(GO:0005576);cellular_component:integral component of plasma membrane(GO:0005887);biological_process:proteolysis(GO:0006508);biological_process:cell adhesion(GO:0007155);biological_process:central nervous…
ENSG00000185038	-4.82988	-1.97695	0.00635057	0.0617307	MROH2A	_	_
ENSG00000125409	-4.82913	-1.97685	0.00366292	0.0387189	TEKT3	K18630	biological_process:microtubule cytoskeleton organization(GO:0000226);cellular_component:cytoplasm(GO:0005737);cellular_component:microtubule(GO:0005874)
ENSG00000243550	-4.81611	-1.97722	0.00266192	0.0296078	RP11-483E7.1	_	_
ENSG00000267924	-4.81478	-1.97727	0.00274643	0.0304251	RP11-255H23.4	_	_
ENSG00000047936	-4.78819	-0.0125577	4.78e-09	1.68e-07	ROS1	K05088	biological_process:columnar/cuboidal epithelial cell development(GO:0002066);molecular_function:protein tyrosine kinase activity(GO:0004713);molecular_function:transmembrane receptor protein tyrosine kinase activity(GO:0004714);molecular_function:ATP binding(GO:0005524);cellular_component:plasma membrane(GO:0005886);biological_process:protein phosphorylation(GO:0006468);biological_process:transme…
ENSG00000258809	-4.77565	-1.97776	0.00635057	0.0617307	CTD-2555O16.1	_	_
ENSG00000074803	-4.71134	-2.04084	0.00635057	0.0617307	SLC12A1	K14425	biological_process:kidney development(GO:0001822);molecular_function:transporter activity(GO:0005215);cellular_component:plasma membrane(GO:0005886);biological_process:transport(GO:0006810);biological_process:ion transport(GO:0006811);biological_process:potassium ion transport(GO:0006813);biological_process:sodium ion transport(GO:0006814);biological_process:excretion(GO:0007588);molecular_functi…
ENSG00000241098	-4.70795	-2.04088	0.00635057	0.0617307	RP11-139K4.1	_	_
ENSG00000073146	-4.68275	-2.04131	0.00536162	0.0537601	MOV10L1	K13983	molecular_function:magnesium ion binding(GO:0000287);molecular_function:RNA binding(GO:0003723);molecular_function:ATP-dependent RNA helicase activity(GO:0004004);molecular_function:ATP binding(GO:0005524);cellular_component:intracellular(GO:0005622);biological_process:multicellular organismal development(GO:0007275);biological_process:germ cell development(GO:0007281);biological_process:spermato…
ENSG00000099139	-4.68151	-2.04136	0.00533302	0.0535362	PCSK5	K08654	biological_process:kidney development(GO:0001822);biological_process:renin secretion into blood stream(GO:0002001);molecular_function:serine-type endopeptidase activity(GO:0004252);cellular_component:extracellular space(GO:0005615);cellular_component:Golgi apparatus(GO:0005794);cellular_component:Golgi lumen(GO:0005796);biological_process:signal peptide processing(GO:0006465);biological_process:p…
ENSG00000156219	-4.68151	-2.04136	0.00533374	0.0535362	ART3	K00775	molecular_function:NAD+ ADP-ribosyltransferase activity(GO:0003950);molecular_function:NAD(P)+-protein-arginine ADP-ribosyltransferase activity(GO:0003956);cellular_component:integral component of plasma membrane(GO:0005887);biological_process:protein ADP-ribosylation(GO:0006471);cellular_component:anchored component of membrane(GO:0031225)
ENSG00000204613	-4.67882	-2.04129	0.0102717	0.09253	TRIM10	K12002	molecular_function:molecular_function(GO:0003674);cellular_component:cytoplasm(GO:0005737);biological_process:biological_process(GO:0008150);molecular_function:zinc ion binding(GO:0008270);biological_process:erythrocyte differentiation(GO:0030218)
ENSG00000066056	-4.67735	-2.04144	0.00595024	0.0585669	TIE1	K05120	biological_process:angiogenesis(GO:0001525);biological_process:in utero embryonic development(GO:0001701);molecular_function:protein tyrosine kinase activity(GO:0004713);molecular_function:transmembrane receptor protein tyrosine kinase activity(GO:0004714);molecular_function:protein binding(GO:0005515);molecular_function:ATP binding(GO:0005524);cellular_component:plasma membrane(GO:0005886);cellu…
ENSG00000133454	-4.67639	-2.04134	0.00962775	0.0880858	MYO18B	K10362	molecular_function:motor activity(GO:0003774);molecular_function:actin binding(GO:0003779);molecular_function:ATP binding(GO:0005524);cellular_component:nucleus(GO:0005634);cellular_component:nucleolus(GO:0005730);cellular_component:cytoplasm(GO:0005737);cellular_component:myosin complex(GO:0016459);cellular_component:unconventional myosin complex(GO:0016461);cellular_component:sarcomere(GO:00300…
ENSG00000143520	-4.67639	-2.04134	0.00963231	0.0880899	FLG2	K10384	molecular_function:structural molecule activity(GO:0005198);molecular_function:calcium ion binding(GO:0005509)
ENSG00000174595	-4.67335	-2.04137	0.0102717	0.09253	KLF14	K09208	molecular_function:DNA binding(GO:0003677);cellular_component:nucleus(GO:0005634);biological_process:transcription, DNA-templated(GO:0006351);biological_process:regulation of transcription, DNA-templated(GO:0006355);molecular_function:metal ion binding(GO:0046872)
ENSG00000226216	-4.66707	-2.04147	0.0102717	0.09253	RPS12P5	K02951	_
ENSG00000242611	-4.66504	-2.04156	0.00819183	0.0769046	AC093627.8	_	_
ENSG00000088827	-4.65488	-2.04164	0.0102717	0.09253	SIGLEC1	K06548	cellular_component:extracellular region(GO:0005576);cellular_component:plasma membrane(GO:0005886);biological_process:endocytosis(GO:0006897);biological_process:inflammatory response(GO:0006954);biological_process:cell-matrix adhesion(GO:0007160);cellular_component:integral component of membrane(GO:0016021);biological_process:single organismal cell-cell adhesion(GO:0016337);molecular_function:car…
ENSG00000233901	-4.65488	-2.04164	0.0102717	0.09253	RP11-65J3.1	_	_
ENSG00000134817	-4.64943	-2.04172	0.0102717	0.09253	APLNR	K04174	molecular_function:receptor activity(GO:0004872);molecular_function:G-protein coupled receptor activity(GO:0004930);cellular_component:plasma membrane(GO:0005886);cellular_component:integral component of plasma membrane(GO:0005887);biological_process:G-protein coupled receptor signaling pathway(GO:0007186);biological_process:regulation of body fluid levels(GO:0050878)
ENSG00000181007	-4.5621	-2.10796	0.0102717	0.09253	ZFP82	K09228	molecular_function:nucleic acid binding(GO:0003676);molecular_function:DNA binding(GO:0003677);cellular_component:intracellular(GO:0005622);cellular_component:nucleus(GO:0005634);biological_process:transcription, DNA-templated(GO:0006351);biological_process:regulation of transcription, DNA-templated(GO:0006355);molecular_function:metal ion binding(GO:0046872)
ENSG00000066468	-4.56054	-0.858567	1.31e-05	0.000263701	FGFR2	K05093	biological_process:negative regulation of transcription from RNA polymerase II promoter(GO:0000122);biological_process:angiogenesis(GO:0001525);biological_process:ureteric bud development(GO:0001657);biological_process:in utero embryonic development(GO:0001701);biological_process:positive regulation of mesenchymal cell proliferation(GO:0002053);biological_process:outflow tract septum morphogenesi…
ENSG00000263264	-4.55347	-2.10797	0.00686771	0.0659928	CTB-133G6.1	_	_
ENSG00000084674	-4.55286	-2.10808	0.0102717	0.09253	APOB	K14462	biological_process:retinoid metabolic process(GO:0001523);biological_process:in utero embryonic development(GO:0001701);molecular_function:lipid transporter activity(GO:0005319);molecular_function:protein binding(GO:0005515);molecular_function:phospholipid binding(GO:0005543);cellular_component:extracellular region(GO:0005576);cellular_component:extracellular space(GO:0005615);cellular_component:…
ENSG00000213376	-4.54839	-2.10805	0.00627588	0.0612205	GAPDHP71	K00134	_
ENSG00000252091	-4.54362	-2.10821	0.0168722	0.140002	RNU6-1146P	_	_
ENSG00000224057	-4.54362	-2.10821	0.0168659	0.140002	EGFR-AS1	_	_
ENSG00000147570	-4.5425	-2.10819	0.0110791	0.0984854	DNAJC5B	K09525	cellular_component:membrane(GO:0016020)
ENSG00000155918	-4.54093	-2.10822	0.00984875	0.0897814	RAET1L	K07987	cellular_component:plasma membrane(GO:0005886);biological_process:immune response(GO:0006955);biological_process:antigen processing and presentation(GO:0019882);cellular_component:anchored component of membrane(GO:0031225)
ENSG00000250770	-4.53964	-2.10827	0.0101424	0.0918079	RP5-1063M23.1	_	_
ENSG00000252103	-4.53871	-2.1083	0.0100943	0.0914873	RNU6-917P	_	_
ENSG00000234183	-4.5374	-2.10835	0.0100403	0.0911066	AC004854.4	_	_
ENSG00000267658	-4.5374	-2.10835	0.0100413	0.0911066	RP11-358B23.1	_	_
ENSG00000156920	-4.53476	-2.10834	0.0158193	0.132987	GPR112	K08455	molecular_function:G-protein coupled receptor activity(GO:0004930);cellular_component:plasma membrane(GO:0005886);biological_process:G-protein coupled receptor signaling pathway(GO:0007186);biological_process:neuropeptide signaling pathway(GO:0007218);cellular_component:integral component of membrane(GO:0016021)
ENSG00000073910	-4.53475	-2.10834	0.0158238	0.133004	FRY	_	cellular_component:spindle pole(GO:0000922);cellular_component:cytoplasm(GO:0005737);cellular_component:microtubule organizing center(GO:0005815)
ENSG00000184459	-4.53475	-2.10834	0.0158258	0.133004	BPIFC	_	molecular_function:lipopolysaccharide binding(GO:0001530);molecular_function:phospholipid binding(GO:0005543);cellular_component:extracellular region(GO:0005576);molecular_function:lipid binding(GO:0008289)
ENSG00000166897	-4.53406	-2.10843	0.0106821	0.0955716	ELFN2	K17568	molecular_function:protein phosphatase inhibitor activity(GO:0004864);biological_process:negative regulation of phosphatase activity(GO:0010923);cellular_component:integral component of membrane(GO:0016021);molecular_function:phosphatase binding(GO:0019902)
ENSG00000256146	-4.53406	-2.10843	0.0106836	0.0955716	RP11-319E16.2	_	_
ENSG00000133985	-4.53067	-0.887685	4.94e-09	1.73e-07	TTC9	_	_
ENSG00000176716	-4.52519	-2.10846	0.0168955	0.140002	OR10AB1P	K04257	molecular_function:olfactory receptor activity(GO:0004984);biological_process:G-protein coupled receptor signaling pathway(GO:0007186);cellular_component:integral component of membrane(GO:0016021)
ENSG00000213130	-4.52519	-2.10846	0.0168955	0.140002	EEF1DP5	K15410	_
ENSG00000149256	-4.516	-2.10859	0.0168955	0.140002	TENM4	_	biological_process:gastrulation with mouth forming second(GO:0001702);cellular_component:nucleus(GO:0005634);cellular_component:cytoplasm(GO:0005737);cellular_component:integral component of plasma membrane(GO:0005887);biological_process:signal transduction(GO:0007165);biological_process:positive regulation of myelination(GO:0031643);biological_process:central nervous system myelin formation(GO:0…
ENSG00000109625	-4.516	-2.10859	0.0168955	0.140002	CPZ	K13022	molecular_function:metallocarboxypeptidase activity(GO:0004181);cellular_component:proteinaceous extracellular matrix(GO:0005578);biological_process:proteolysis(GO:0006508);molecular_function:zinc ion binding(GO:0008270);biological_process:Wnt signaling pathway(GO:0016055)
ENSG00000252379	-4.49765	-2.10884	0.0168955	0.140002	RNU6-1002P	_	_
ENSG00000256482	-4.4473	-0.947557	2.08e-07	5.73e-06	RP11-625L16.3	_	_
ENSG00000248477	-4.40447	-2.17824	0.0168955	0.140002	RP11-848G14.2	K12807	_
ENSG00000258997	-4.39616	-2.17835	0.0168955	0.140002	NF1P2	K08052	_
ENSG00000237413	-4.3898	-2.17843	0.0168955	0.140002	RP11-183M13.1	_	_
ENSG00000185669	-4.38808	-2.17837	0.0118571	0.104487	SNAI3	K09217	molecular_function:DNA binding(GO:0003677);molecular_function:sequence-specific DNA binding transcription factor activity(GO:0003700);molecular_function:copper ion binding(GO:0005507);cellular_component:nucleus(GO:0005634);cellular_component:transcription factor complex(GO:0005667);biological_process:transcription, DNA-templated(GO:0006351)
ENSG00000081248	-4.38651	-2.17848	0.0168955	0.140002	CACNA1S	K04857	biological_process:skeletal system development(GO:0001501);biological_process:extraocular skeletal muscle development(GO:0002074);molecular_function:voltage-gated calcium channel activity(GO:0005245);cellular_component:cytoplasm(GO:0005737);cellular_component:plasma membrane(GO:0005886);cellular_component:voltage-gated calcium channel complex(GO:0005891);biological_process:calcium ion transport(G…
ENSG00000102755	-4.38651	-2.17848	0.0168955	0.140002	FLT1	K05096	biological_process:patterning of blood vessels(GO:0001569);biological_process:sprouting angiogenesis(GO:0002040);biological_process:monocyte chemotaxis(GO:0002548);molecular_function:transmembrane receptor protein tyrosine kinase activity(GO:0004714);molecular_function:vascular endothelial growth factor-activated receptor activity(GO:0005021);molecular_function:protein binding(GO:0005515);molecul…
ENSG00000205978	-4.38651	-2.17848	0.0168955	0.140002	NYNRIN	_	molecular_function:molecular_function(GO:0003674);molecular_function:nucleic acid binding(GO:0003676);cellular_component:cellular_component(GO:0005575);biological_process:biological_process(GO:0008150);biological_process:DNA integration(GO:0015074);cellular_component:integral component of membrane(GO:0016021)
ENSG00000238221	-4.38382	-2.17851	0.0168955	0.140002	RP11-69L16.4	_	_
ENSG00000188064	-4.38106	-2.17849	0.0104062	0.0935092	WNT7B	K00572	biological_process:in utero embryonic development(GO:0001701);biological_process:metanephros morphogenesis(GO:0003338);molecular_function:receptor binding(GO:0005102);molecular_function:frizzled binding(GO:0005109);molecular_function:extracellular matrix structural constituent(GO:0005201);cellular_component:extracellular region(GO:0005576);cellular_component:proteinaceous extracellular matrix(GO:…
ENSG00000253334	-4.38074	-2.17853	0.0116733	0.103118	RP13-923O23.6	_	_
ENSG00000125337	-4.38074	-2.17853	0.0116697	0.103102	KIF25	K18627	biological_process:mitotic sister chromatid segregation(GO:0000070);molecular_function:microtubule motor activity(GO:0003777);molecular_function:ATP binding(GO:0005524);cellular_component:cytoplasm(GO:0005737);cellular_component:kinesin complex(GO:0005871);cellular_component:microtubule(GO:0005874);biological_process:organelle organization(GO:0006996);biological_process:microtubule-based movement…
ENSG00000120162	-4.37845	-2.17857	0.0103153	0.0928361	MOB3B	K12581	molecular_function:protein binding(GO:0005515);molecular_function:metal ion binding(GO:0046872)
ENSG00000168269	-4.37845	-2.17857	0.0103143	0.0928361	FOXI1	K09401	molecular_function:double-stranded DNA binding(GO:0003690);molecular_function:sequence-specific DNA binding transcription factor activity(GO:0003700);molecular_function:RNA polymerase II distal enhancer sequence-specific DNA binding transcription factor activity(GO:0003705);cellular_component:nucleus(GO:0005634);cellular_component:transcription factor complex(GO:0005667);biological_process:patter…
ENSG00000263635	-4.37845	-2.17857	0.0103127	0.0928361	RP11-805F19.2	_	_
ENSG00000203697	-4.37698	-2.17862	0.019188	0.155417	CAPN8	K08577	molecular_function:calcium-dependent cysteine-type endopeptidase activity(GO:0004198);molecular_function:calcium ion binding(GO:0005509);cellular_component:intracellular(GO:0005622);cellular_component:Golgi apparatus(GO:0005794);biological_process:proteolysis(GO:0006508)
ENSG00000196090	-4.37689	-2.17861	0.0165587	0.1381	PTPRT	K13297	molecular_function:protein tyrosine phosphatase activity(GO:0004725);molecular_function:protein binding(GO:0005515);cellular_component:plasma membrane(GO:0005886);biological_process:protein dephosphorylation(GO:0006470);biological_process:cell adhesion(GO:0007155);biological_process:homophilic cell adhesion via plasma membrane adhesion molecules(GO:0007156);biological_process:signal transduction(…
ENSG00000153253	-4.37689	-2.17861	0.0165628	0.138114	SCN3A	K04836	cellular_component:voltage-gated sodium channel complex(GO:0001518);molecular_function:ion channel activity(GO:0005216);molecular_function:voltage-gated sodium channel activity(GO:0005248);cellular_component:cytoplasm(GO:0005737);biological_process:sodium ion transport(GO:0006814);cellular_component:integral component of membrane(GO:0016021)
ENSG00000250751	-4.37533	-2.17865	0.0207479	0.165506	RP11-613C6.2	_	_
ENSG00000164690	-4.37414	-2.1787	0.0196779	0.15871	SHH	_	biological_process:negative regulation of transcription from RNA polymerase II promoter(GO:0000122);biological_process:patterning of blood vessels(GO:0001569);biological_process:vasculogenesis(GO:0001570);biological_process:metanephros development(GO:0001656);biological_process:branching involved in ureteric bud morphogenesis(GO:0001658);biological_process:cell fate specification(GO:0001708);biol…
ENSG00000250095	-4.37414	-2.1787	0.0196794	0.15871	NREP-AS1	_	_
ENSG00000178038	-4.37414	-2.1787	0.0196795	0.15871	ALS2CL	_	molecular_function:Rho guanyl-nucleotide exchange factor activity(GO:0005089);molecular_function:GTPase activator activity(GO:0005096);biological_process:endosome organization(GO:0007032);biological_process:protein localization(GO:0008104);cellular_component:cytoplasmic membrane-bounded vesicle(GO:0016023);molecular_function:Rab GTPase binding(GO:0017137);biological_process:regulation of Rho prot…
ENSG00000241357	-4.36832	-2.17878	0.0224137	0.176317	RP11-758P17.2	_	_
ENSG00000164796	-4.36726	-2.17873	0.0282968	0.212553	CSMD3	K17495	cellular_component:plasma membrane(GO:0005886);cellular_component:integral component of membrane(GO:0016021)
ENSG00000169436	-4.36608	-2.17883	0.0222798	0.175526	COL22A1	K16630	cellular_component:extracellular region(GO:0005576);cellular_component:collagen trimer(GO:0005581);cellular_component:endoplasmic reticulum lumen(GO:0005788);biological_process:extracellular matrix organization(GO:0030198)
ENSG00000206755	-4.36304	-2.17879	0.0272724	0.207299	SNORA30	_	_
ENSG00000233995	-4.35766	-2.17886	0.0282968	0.212553	KB-67B5.12	K00922	_
ENSG00000164403	-4.35766	-2.17886	0.0282968	0.212553	SHROOM1	K18625	biological_process:cell morphogenesis(GO:0000902);cellular_component:cytoplasm(GO:0005737);cellular_component:microtubule(GO:0005874);cellular_component:myosin II complex(GO:0016460);molecular_function:actin filament binding(GO:0051015);biological_process:actin filament bundle assembly(GO:0051017)
ENSG00000148600	-4.35402	-2.17891	0.0282968	0.212553	CDHR1	K16501	molecular_function:calcium ion binding(GO:0005509);cellular_component:plasma membrane(GO:0005886);cellular_component:integral component of plasma membrane(GO:0005887);biological_process:homophilic cell adhesion via plasma membrane adhesion molecules(GO:0007156);cellular_component:integral component of membrane(GO:0016021);cellular_component:photoreceptor outer segment membrane(GO:0042622);biologi…
ENSG00000197635	-4.35402	-2.17891	0.0282968	0.212553	DPP4	K01278	biological_process:response to hypoxia(GO:0001666);molecular_function:protease binding(GO:0002020);molecular_function:aminopeptidase activity(GO:0004177);molecular_function:serine-type endopeptidase activity(GO:0004252);molecular_function:receptor binding(GO:0005102);molecular_function:protein binding(GO:0005515);cellular_component:plasma membrane(GO:0005886);biological_process:proteolysis(GO:000…
ENSG00000172752	-4.35402	-2.17891	0.0282968	0.212553	COL6A5	K06238	cellular_component:extracellular region(GO:0005576);cellular_component:collagen trimer(GO:0005581);biological_process:cell adhesion(GO:0007155);biological_process:extracellular matrix disassembly(GO:0022617);biological_process:extracellular matrix organization(GO:0030198);biological_process:collagen catabolic process(GO:0030574);cellular_component:extracellular matrix(GO:0031012)
ENSG00000163564	-4.34808	-2.17899	0.0282968	0.212553	PYHIN1	_	biological_process:cell cycle(GO:0007049);cellular_component:nuclear speck(GO:0016607)
ENSG00000254166	-4.34445	-2.17903	0.0282968	0.212553	CASC19	_	_
ENSG00000248608	-4.27273	-1.07548	2.8e-07	7.55e-06	RP11-206P5.2	K01858	_
ENSG00000175161	-4.21941	-2.25223	0.0282968	0.212553	CADM2	K06782	cellular_component:cytoplasm(GO:0005737);cellular_component:plasma membrane(GO:0005886);biological_process:cell adhesion(GO:0007155);biological_process:brain development(GO:0007420);cellular_component:integral component of membrane(GO:0016021);cellular_component:cell junction(GO:0030054);cellular_component:axon(GO:0030424);cellular_component:neuronal cell body membrane(GO:0032809);biological_proc…
ENSG00000237705	-4.21941	-2.25223	0.0282968	0.212553	AC008937.2	_	_
ENSG00000079841	-4.21941	-2.25223	0.0282968	0.212553	RIMS1	K15291	;molecular_function:protein binding(GO:0005515);cellular_component:plasma membrane(GO:0005886);biological_process:protein complex assembly(GO:0006461);biological_process:intracellular protein transport(GO:0006886);biological_process:synaptic transmission(GO:0007268);biological_process:neurotransmitter secretion(GO:0007269);biological_process:visual perception(GO:0007601);biological_process:glutam…
ENSG00000255317	-4.2142	-2.25229	0.0282968	0.212553	RP11-688I9.2	_	_
ENSG00000118971	-4.2093	-2.25236	0.0282968	0.212553	CCND2	K10151	cellular_component:cyclin-dependent protein kinase holoenzyme complex(GO:0000307);cellular_component:chromatin(GO:0000785);biological_process:positive regulation of protein phosphorylation(GO:0001934);cellular_component:nucleus(GO:0005634);cellular_component:nucleolus(GO:0005730);cellular_component:cytosol(GO:0005829);biological_process:cell cycle(GO:0007049);molecular_function:protein kinase bin…
ENSG00000187323	-4.2093	-2.25236	0.0282968	0.212553	DCC	_	biological_process:neuron migration(GO:0001764);biological_process:response to amphetamine(GO:0001975);molecular_function:transcription coactivator activity(GO:0003713);molecular_function:transmembrane signaling receptor activity(GO:0004888);molecular_function:netrin receptor activity(GO:0005042);molecular_function:protein binding(GO:0005515);cellular_component:cytosol(GO:0005829);cellular_compon…
ENSG00000197872	-4.2093	-2.25236	0.0282968	0.212553	FAM49A	_	cellular_component:intracellular(GO:0005622)
ENSG00000036565	-4.2093	-2.25236	0.0282968	0.212553	SLC18A1	K08155	cellular_component:endoplasmic reticulum membrane(GO:0005789);biological_process:neurotransmitter transport(GO:0006836);molecular_function:monoamine transmembrane transporter activity(GO:0008504);molecular_function:drug transmembrane transporter activity(GO:0015238);biological_process:monoamine transport(GO:0015844);cellular_component:membrane(GO:0016020);cellular_component:integral component of …
ENSG00000120156	-4.2093	-2.25236	0.0282968	0.212553	TEK	K05121	biological_process:angiogenesis(GO:0001525);cellular_component:stress fiber(GO:0001725);biological_process:positive regulation of protein phosphorylation(GO:0001934);biological_process:endothelial cell proliferation(GO:0001935);biological_process:positive regulation of endothelial cell proliferation(GO:0001938);biological_process:sprouting angiogenesis(GO:0002040);molecular_function:protein kinas…
ENSG00000174448	-4.20655	-2.25239	0.0282968	0.212553	STARD6	_	biological_process:lipid transport(GO:0006869);molecular_function:lipid binding(GO:0008289)
ENSG00000212766	-4.20259	-2.25237	0.0213399	0.169133	LINC00277	_	_
ENSG00000265142	-4.20259	-2.25237	0.0213374	0.169133	MIR1-2	_	_
ENSG00000160471	-4.20124	-2.25242	0.0226227	0.177574	COX6B2	K02267	molecular_function:cytochrome-c oxidase activity(GO:0004129);cellular_component:mitochondrial intermembrane space(GO:0005758);cellular_component:mitochondrial crista(GO:0030061)
ENSG00000240665	-4.20124	-2.25242	0.0226182	0.177574	LSP1P2	K14957	_
ENSG00000127585	-4.19921	-2.25249	0.0282968	0.212553	FBXL16	K10282	_
ENSG00000189375	-4.19921	-2.25249	0.0282968	0.212553	TBC1D28	_	_
ENSG00000223711	-4.19921	-2.25249	0.0282968	0.212553	AC091633.3	_	_
ENSG00000233906	-4.19921	-2.25249	0.0282968	0.212553	RP11-315I14.2	_	_
ENSG00000143921	-4.19824	-2.25245	0.0200427	0.160784	ABCG8	K05684	molecular_function:ATP binding(GO:0005524);cellular_component:plasma membrane(GO:0005886);;biological_process:response to nutrient(GO:0007584);biological_process:excretion(GO:0007588);biological_process:negative regulation of intestinal phytosterol absorption(GO:0010949);biological_process:phospholipid transport(GO:0015914);biological_process:sterol transport(GO:0015918);cellular_component:integr…
ENSG00000237351	-4.19824	-2.25245	0.0200417	0.160784	CTD-2522E6.4	K00913	_
ENSG00000129009	-4.19647	-2.25251	0.0282968	0.212553	ISLR	_	cellular_component:extracellular region(GO:0005576);biological_process:cell adhesion(GO:0007155)
ENSG00000180081	-4.19644	-2.2525	0.0199274	0.160108	CTC-451A6.4	_	_
ENSG00000124256	-4.19644	-2.2525	0.0199267	0.160108	ZBP1	K12965	molecular_function:DNA binding(GO:0003677);molecular_function:left-handed Z-DNA binding(GO:0003692);molecular_function:RNA binding(GO:0003723);molecular_function:double-stranded RNA adenosine deaminase activity(GO:0003726);cellular_component:nucleus(GO:0005634);cellular_component:cytoplasm(GO:0005737);cellular_component:cytosol(GO:0005829);biological_process:biological_process(GO:0008150);biologi…
ENSG00000114455	-4.19526	-2.25253	0.0210278	0.167186	HHLA2	_	molecular_function:molecular_function(GO:0003674);cellular_component:cellular_component(GO:0005575);biological_process:biological_process(GO:0008150);cellular_component:integral component of membrane(GO:0016021)
ENSG00000255071	-4.19526	-2.25253	0.0210251	0.167186	SAA2-SAA4	_	_
ENSG00000155093	-4.19526	-2.25253	0.0210248	0.167186	PTPRN2	K07817	molecular_function:protein tyrosine phosphatase activity(GO:0004725);molecular_function:transmembrane receptor protein tyrosine phosphatase activity(GO:0005001);cellular_component:endoplasmic reticulum lumen(GO:0005788);cellular_component:integral component of plasma membrane(GO:0005887);biological_process:protein dephosphorylation(GO:0006470);cellular_component:secretory granule(GO:0030141);cell…
ENSG00000234690	-4.19526	-2.25253	0.0210243	0.167186	AC073283.4	_	_
ENSG00000260586	-4.19526	-2.25253	0.0210234	0.167186	RP11-592N21.2	_	_
ENSG00000134321	-4.19447	-2.25255	0.0223812	0.176099	RSAD2	K15045	biological_process:ossification(GO:0001503);molecular_function:molecular_function(GO:0003674);molecular_function:catalytic activity(GO:0003824);molecular_function:protein binding(GO:0005515);cellular_component:mitochondrion(GO:0005739);cellular_component:mitochondrial outer membrane(GO:0005741);cellular_component:mitochondrial inner membrane(GO:0005743);cellular_component:endoplasmic reticulum(GO…
ENSG00000101638	-4.19356	-2.25258	0.019758	0.159255	ST8SIA5	_	molecular_function:alpha-N-acetylneuraminate alpha-2,8-sialyltransferase activity(GO:0003828);biological_process:carbohydrate metabolic process(GO:0005975);biological_process:protein glycosylation(GO:0006486);biological_process:glycosphingolipid biosynthetic process(GO:0006688);molecular_function:sialyltransferase activity(GO:0008373);cellular_component:integral component of Golgi membrane(GO:003…
ENSG00000203506	-4.19125	-2.25263	0.0207643	0.165614	RBMS3-AS2	_	_
ENSG00000235725	-4.19022	-2.25259	0.0282968	0.212553	AC007389.3	_	_
ENSG00000180347	-4.18915	-2.25261	0.0282968	0.212553	CCDC129	_	_
ENSG00000005108	-4.18911	-2.25266	0.0397655	0.279327	THSD7A	_	biological_process:angiogenesis(GO:0001525);cellular_component:extracellular region(GO:0005576);cellular_component:plasma membrane(GO:0005886);cellular_component:integral component of membrane(GO:0016021);biological_process:cell differentiation(GO:0030154)
ENSG00000155966	-4.18911	-2.25266	0.0397661	0.279327	AFF2	K15194	molecular_function:G-quadruplex RNA binding(GO:0002151);biological_process:mRNA processing(GO:0006397);biological_process:brain development(GO:0007420);biological_process:learning or memory(GO:0007611);biological_process:RNA splicing(GO:0008380);cellular_component:nuclear speck(GO:0016607);biological_process:regulation of RNA splicing(GO:0043484)
ENSG00000165794	-4.18911	-2.25266	0.0397681	0.279327	SLC39A2	K14709	molecular_function:zinc ion transmembrane transporter activity(GO:0005385);cellular_component:plasma membrane(GO:0005886);cellular_component:integral component of plasma membrane(GO:0005887);biological_process:zinc II ion transport(GO:0006829);cellular_component:cytoplasmic membrane-bounded vesicle(GO:0016023);biological_process:transmembrane transport(GO:0055085)
ENSG00000243265	-4.18696	-2.25271	0.0395686	0.278475	RP11-1149O23.1	K02893	_
ENSG00000267606	-4.18696	-2.25271	0.039569	0.278475	AC006116.21	_	_
ENSG00000137571	-4.18695	-2.25271	0.0395797	0.278475	SLCO5A1	_	molecular_function:transporter activity(GO:0005215);cellular_component:plasma membrane(GO:0005886);cellular_component:membrane(GO:0016020);cellular_component:integral component of membrane(GO:0016021)
ENSG00000230001	-4.18695	-2.25271	0.0395819	0.278475	RP11-70J12.1	_	_
ENSG00000116183	-4.1791	-2.25274	0.0483221	0.324078	PAPPA2	K08647	biological_process:regulation of cell growth(GO:0001558);cellular_component:extracellular region(GO:0005576);cellular_component:intracellular(GO:0005622);biological_process:proteolysis(GO:0006508);molecular_function:metallopeptidase activity(GO:0008237);molecular_function:zinc ion binding(GO:0008270);cellular_component:membrane(GO:0016020);biological_process:cell differentiation(GO:0030154);biolo…
ENSG00000273079	-4.1791	-2.25274	0.0483221	0.324078	GRIN2B	K05210	biological_process:behavioral fear response(GO:0001662);biological_process:in utero embryonic development(GO:0001701);biological_process:startle response(GO:0001964);biological_process:suckling behavior(GO:0001967);molecular_function:N-methyl-D-aspartate selective glutamate receptor activity(GO:0004972);molecular_function:extracellular-glutamate-gated ion channel activity(GO:0005234);molecular_fu…
ENSG00000100433	-4.1791	-2.25274	0.0483221	0.324078	KCNK10	K04920	molecular_function:voltage-gated ion channel activity(GO:0005244);molecular_function:potassium channel activity(GO:0005267);cellular_component:plasma membrane(GO:0005886);biological_process:transport(GO:0006810);biological_process:signal transduction(GO:0007165);biological_process:synaptic transmission(GO:0007268);cellular_component:membrane(GO:0016020);cellular_component:integral component of me…
ENSG00000099337	-4.1791	-2.25274	0.0483221	0.324078	KCNK6	K17985	molecular_function:inward rectifier potassium channel activity(GO:0005242);cellular_component:plasma membrane(GO:0005886);biological_process:potassium ion transport(GO:0006813);biological_process:synaptic transmission(GO:0007268);cellular_component:voltage-gated potassium channel complex(GO:0008076)
ENSG00000197701	-4.1791	-2.25274	0.0483221	0.324078	ZNF595	K09228	molecular_function:nucleic acid binding(GO:0003676);molecular_function:DNA binding(GO:0003677);cellular_component:intracellular(GO:0005622);cellular_component:nucleus(GO:0005634);biological_process:transcription, DNA-templated(GO:0006351);biological_process:regulation of transcription, DNA-templated(GO:0006355);molecular_function:metal ion binding(GO:0046872)
ENSG00000184305	-4.1791	-2.25274	0.0483221	0.324078	CCSER1	_	_
ENSG00000249068	-4.1791	-2.25274	0.0483221	0.324078	CTC-287O8.1	K01231	_
ENSG00000247416	-4.17774	-2.25275	0.0483221	0.324078	RP11-629G13.1	_	_
ENSG00000256650	-4.17774	-2.25275	0.0483221	0.324078	RERG-IT1	_	_
ENSG00000124491	-4.17774	-2.25275	0.0483221	0.324078	F13A1	K03917	biological_process:platelet degranulation(GO:0002576);molecular_function:protein-glutamine gamma-glutamyltransferase activity(GO:0003810);cellular_component:extracellular region(GO:0005576);biological_process:blood coagulation(GO:0007596);biological_process:peptide cross-linking(GO:0018149);biological_process:platelet activation(GO:0030168);cellular_component:platelet alpha granule lumen(GO:00310…
ENSG00000258731	-4.17547	-2.25279	0.0480989	0.324078	RP11-547D23.1	_	_
ENSG00000230138	-4.17151	-2.25283	0.0483221	0.324078	RP11-117D22.2	_	_
ENSG00000258314	-4.16908	-2.25287	0.0483221	0.324078	CTD-2314B22.1	_	_
ENSG00000075340	-4.16908	-2.25287	0.0483221	0.324078	ADD2	K09066	molecular_function:actin binding(GO:0003779);molecular_function:structural molecule activity(GO:0005198);molecular_function:calmodulin binding(GO:0005516);cellular_component:cytoskeleton(GO:0005856);cellular_component:plasma membrane(GO:0005886);biological_process:protein complex assembly(GO:0006461);cellular_component:F-actin capping protein complex(GO:0008290);cellular_component:membrane(GO:001…
ENSG00000176049	-4.16908	-2.25287	0.0483221	0.324078	JAKMIP2	_	cellular_component:Golgi apparatus(GO:0005794);molecular_function:microtubule binding(GO:0008017);molecular_function:kinase activity(GO:0016301);molecular_function:kinase binding(GO:0019900)
ENSG00000233524	-4.1653	-2.25291	0.0483221	0.324078	RANP8	K07936	_
ENSG00000141579	-4.1653	-2.25291	0.0483221	0.324078	ZNF750	_	molecular_function:core promoter sequence-specific DNA binding(GO:0001046);molecular_function:RNA polymerase II core promoter proximal region sequence-specific DNA binding transcription factor activity involved in positive regulation of transcription(GO:0001077);cellular_component:nucleus(GO:0005634);biological_process:epidermis development(GO:0008544);biological_process:cell differentiation(GO:0…
ENSG00000176395	-4.1653	-2.25291	0.0483221	0.324078	CEACAM20	_	cellular_component:integral component of membrane(GO:0016021)
ENSG00000273245	-4.1653	-2.25291	0.0483221	0.324078	RP11-434P11.2	_	_
ENSG00000136449	-4.15909	-2.25299	0.0483221	0.324078	MYCBPAP	K17985	molecular_function:protein binding(GO:0005515);cellular_component:cytoplasm(GO:0005737);biological_process:synaptic transmission(GO:0007268);biological_process:multicellular organismal development(GO:0007275);biological_process:spermatogenesis(GO:0007283);cellular_component:membrane(GO:0016020);biological_process:cell differentiation(GO:0030154)
ENSG00000200013	-4.15909	-2.25299	0.0483221	0.324078	RNU6-623P	_	_
ENSG00000238433	-4.15909	-2.25299	0.0483221	0.324078	snoU13	_	_
ENSG00000212724	-4.1139	-0.571148	7.8e-10	3.1e-08	KRTAP2-3	_	cellular_component:keratin filament(GO:0045095)
ENSG00000179403	-4.01269	-2.33016	0.0483221	0.324078	VWA1	_	cellular_component:basement membrane(GO:0005604);cellular_component:interstitial matrix(GO:0005614);biological_process:extracellular matrix organization(GO:0030198);molecular_function:identical protein binding(GO:0042802);biological_process:behavioral response to pain(GO:0048266)
ENSG00000169397	-4.01269	-2.33016	0.0483221	0.324078	RNASE3	K10787	molecular_function:nucleic acid binding(GO:0003676);molecular_function:ribonuclease A activity(GO:0004522);molecular_function:ribonuclease activity(GO:0004540);cellular_component:extracellular region(GO:0005576);biological_process:RNA catabolic process(GO:0006401);biological_process:defense response to bacterium(GO:0042742)
ENSG00000168497	-4.0089	-1.25378	5.75e-06	0.00012441	SDPR	K19387	molecular_function:phosphatidylserine binding(GO:0001786);molecular_function:protein binding(GO:0005515);molecular_function:phospholipid binding(GO:0005543);cellular_component:cytoplasm(GO:0005737);cellular_component:Golgi apparatus(GO:0005794);cellular_component:cytosol(GO:0005829);cellular_component:plasma membrane(GO:0005886);cellular_component:caveola(GO:0005901)
ENSG00000231666	-4.00868	-2.33021	0.0483221	0.324078	RP11-404O13.1	_	_
ENSG00000257624	-4.00868	-2.33021	0.0483221	0.324078	RP1-128M12.3	_	_
ENSG00000237186	-4.00609	-2.33024	0.0483221	0.324078	RP11-229A12.2	K02995	_
ENSG00000196664	-4.00609	-2.33024	0.0483221	0.324078	TLR7	_	cellular_component:Golgi membrane(GO:0000139);biological_process:toll-like receptor signaling pathway(GO:0002224);biological_process:microglial cell activation involved in immune response(GO:0002282);biological_process:MyD88-dependent toll-like receptor signaling pathway(GO:0002755);molecular_function:double-stranded RNA binding(GO:0003725);molecular_function:single-stranded RNA binding(GO:000372…
ENSG00000260439	-4.00468	-2.33025	0.0483221	0.324078	LA16c-366D3.1	_	_
ENSG00000236054	-4.00468	-2.33025	0.0483221	0.324078	LL22NC03-104C7.1	_	_
ENSG00000133317	-4.00208	-2.33029	0.0483221	0.324078	LGALS12	K10095	cellular_component:nucleus(GO:0005634);cellular_component:mitochondrion(GO:0005739);molecular_function:carbohydrate binding(GO:0030246);molecular_function:lactose binding(GO:0030395);biological_process:intrinsic apoptotic signaling pathway(GO:0097193)
ENSG00000242953	-4.00208	-2.33029	0.0483221	0.324078	RP11-803B1.3	K17299	_
ENSG00000225568	-4.00068	-2.3303	0.0483221	0.324078	RP11-384B12.3	K10685	_
ENSG00000266744	-3.99549	-2.33037	0.0483221	0.324078	RP11-131K5.1	_	_
ENSG00000256463	-3.99549	-2.33037	0.0483221	0.324078	SALL3	K09219	molecular_function:nucleic acid binding(GO:0003676);molecular_function:DNA binding(GO:0003677);cellular_component:nucleus(GO:0005634);biological_process:transcription, DNA-templated(GO:0006351);biological_process:regulation of transcription, DNA-templated(GO:0006355);biological_process:olfactory bulb interneuron development(GO:0021891);biological_process:forelimb morphogenesis(GO:0035136);biologi…
ENSG00000250958	-3.99549	-2.33037	0.0483221	0.324078	LINC00492	_	_
ENSG00000272463	-3.99549	-2.33037	0.0483221	0.324078	RP11-532F6.3	_	_
ENSG00000133863	-3.99549	-2.33037	0.0483221	0.324078	TEX15	K12022	biological_process:synaptonemal complex assembly(GO:0007130);biological_process:male meiosis(GO:0007140);biological_process:spermatogenesis(GO:0007283);biological_process:fertilization(GO:0009566);biological_process:regulation of double-strand break repair via homologous recombination(GO:0010569);biological_process:male genitalia development(GO:0030539);biological_process:regulation of protein lo…
ENSG00000263924	-3.99376	-2.33033	0.0405768	0.283768	RP11-210K20.2	_	_
ENSG00000228488	-3.99376	-2.33033	0.0405749	0.283768	AC092168.4	_	_
ENSG00000234724	-3.99108	-2.33038	0.0402842	0.282335	HDAC1P1	K06067	_
ENSG00000241429	-3.99108	-2.33038	0.0402828	0.282335	EEF1A1P25	K03231	_
ENSG00000204187	-3.9901	-2.33043	0.0483221	0.324078	LINC00619	_	_
ENSG00000231047	-3.9901	-2.33043	0.0483221	0.324078	GCNT1P3	_	_
ENSG00000163823	-3.98941	-2.33042	0.040342	0.282486	CCR1	K04176	biological_process:dendritic cell chemotaxis(GO:0002407);molecular_function:phosphatidylinositol phospholipase C activity(GO:0004435);molecular_function:chemokine receptor activity(GO:0004950);molecular_function:protein binding(GO:0005515);cellular_component:plasma membrane(GO:0005886);cellular_component:integral component of plasma membrane(GO:0005887);biological_process:calcium ion transport(GO…
ENSG00000267004	-3.98941	-2.33042	0.0403405	0.282486	CTD-2659N19.4	_	_
ENSG00000233081	-3.98941	-2.33042	0.0403368	0.282486	RP11-440G5.2	_	_
ENSG00000106113	-3.98941	-2.33042	0.0403365	0.282486	CRHR2	K04579	molecular_function:G-protein coupled receptor activity(GO:0004930);molecular_function:hormone activity(GO:0005179);molecular_function:protein binding(GO:0005515);cellular_component:endoplasmic reticulum(GO:0005783);cellular_component:Golgi apparatus(GO:0005794);cellular_component:plasma membrane(GO:0005886);cellular_component:integral component of plasma membrane(GO:0005887);biological_process:ad…
ENSG00000004846	-3.98667	-2.33046	0.0378083	0.268987	ABCB5	K05660	cellular_component:Golgi membrane(GO:0000139);molecular_function:ATP binding(GO:0005524);cellular_component:plasma membrane(GO:0005886);cellular_component:integral component of plasma membrane(GO:0005887);molecular_function:efflux transmembrane transporter activity(GO:0015562);cellular_component:integral component of membrane(GO:0016021);cellular_component:apical plasma membrane(GO:0016324);biolo…
ENSG00000248356	-3.98667	-2.33046	0.0378072	0.268987	RP11-557J10.4	_	_
ENSG00000166589	-3.98667	-2.33046	0.0378065	0.268987	CDH16	K06810	molecular_function:calcium ion binding(GO:0005509);cellular_component:plasma membrane(GO:0005886);biological_process:cell adhesion(GO:0007155);biological_process:homophilic cell adhesion via plasma membrane adhesion molecules(GO:0007156);cellular_component:integral component of membrane(GO:0016021)
ENSG00000268343	-3.98667	-2.33046	0.0378045	0.268987	AC012414.1	_	_
ENSG00000185640	-3.98611	-2.33047	0.0483221	0.324078	KRT79	K07605	molecular_function:structural molecule activity(GO:0005198);cellular_component:keratin filament(GO:0045095)
ENSG00000238772	-3.98611	-2.33047	0.0483221	0.324078	snoU13	_	_
ENSG00000077943	-3.98493	-2.3305	0.0483221	0.324078	ITGA8	K06584	biological_process:metanephros development(GO:0001656);cellular_component:plasma membrane(GO:0005886);biological_process:cell-matrix adhesion(GO:0007160);biological_process:integrin-mediated signaling pathway(GO:0007229);biological_process:nervous system development(GO:0007399);biological_process:memory(GO:0007613);cellular_component:integrin complex(GO:0008305);biological_process:single organism…
ENSG00000149124	-3.98493	-2.3305	0.0483221	0.324078	GLYAT	K00628	cellular_component:mitochondrion(GO:0005739);cellular_component:mitochondrial matrix(GO:0005759);biological_process:glycine metabolic process(GO:0006544);biological_process:acyl-CoA metabolic process(GO:0006637);biological_process:xenobiotic metabolic process(GO:0006805);biological_process:response to toxic substance(GO:0009636);molecular_function:transferase activity, transferring acyl groups(GO…
ENSG00000111344	-3.98493	-2.3305	0.0483221	0.324078	RASAL1	K17632	;molecular_function:phospholipid binding(GO:0005543);cellular_component:cytoplasm(GO:0005737);biological_process:signal transduction(GO:0007165);cellular_component:intrinsic component of the cytoplasmic side of the plasma membrane(GO:0031235);biological_process:intracellular signal transduction(GO:0035556);biological_process:negative regulation of Ras protein signal transduction(GO:0046580);molec…
ENSG00000089250	-3.98493	-2.3305	0.0483221	0.324078	NOS1	_	biological_process:response to hypoxia(GO:0001666);cellular_component:photoreceptor inner segment(GO:0001917);molecular_function:NADPH-hemoprotein reductase activity(GO:0003958);molecular_function:nitric-oxide synthase activity(GO:0004517);molecular_function:iron ion binding(GO:0005506);molecular_function:protein binding(GO:0005515);molecular_function:calmodulin binding(GO:0005516);cellular_compo…
ENSG00000197616	-3.98493	-2.3305	0.0483221	0.324078	MYH6	K17751	molecular_function:microfilament motor activity(GO:0000146);biological_process:in utero embryonic development(GO:0001701);cellular_component:stress fiber(GO:0001725);biological_process:regulation of the force of heart contraction(GO:0002026);biological_process:regulation of heart rate(GO:0002027);molecular_function:actin binding(GO:0003779);molecular_function:calmodulin binding(GO:0005516);molecu…
ENSG00000200059	-3.98493	-2.3305	0.0483221	0.324078	Y_RNA	_	_
ENSG00000205221	-3.98493	-2.3305	0.0483221	0.324078	VIT	_	molecular_function:glycosaminoglycan binding(GO:0005539);cellular_component:interstitial matrix(GO:0005614);biological_process:positive regulation of cell-substrate adhesion(GO:0010811);biological_process:extracellular matrix organization(GO:0030198)
ENSG00000196277	-3.98493	-2.3305	0.0483221	0.324078	GRM7	_	molecular_function:group III metabotropic glutamate receptor activity(GO:0001642);biological_process:conditioned taste aversion(GO:0001661);biological_process:behavioral fear response(GO:0001662);molecular_function:G-protein coupled receptor activity(GO:0004930);molecular_function:voltage-gated calcium channel activity(GO:0005245);molecular_function:calcium channel regulator activity(GO:0005246);…
ENSG00000164076	-3.98493	-2.3305	0.0483221	0.324078	CAMKV	K08812	molecular_function:protein kinase activity(GO:0004672);molecular_function:calmodulin binding(GO:0005516);molecular_function:ATP binding(GO:0005524);cellular_component:plasma membrane(GO:0005886);cellular_component:cytoplasmic vesicle membrane(GO:0030659)
ENSG00000252504	-3.98493	-2.3305	0.0483221	0.324078	AC097015.1	_	_
ENSG00000165025	-3.98493	-2.3305	0.0483221	0.324078	SYK	K05855	biological_process:angiogenesis(GO:0001525);biological_process:lymph vessel development(GO:0001945);biological_process:adaptive immune response(GO:0002250);biological_process:macrophage activation involved in immune response(GO:0002281);biological_process:neutrophil activation involved in immune response(GO:0002283);biological_process:leukocyte activation involved in immune response(GO:0002366);b…
ENSG00000245112	-3.98448	-2.33051	0.039808	0.279516	SMARCA5-AS1	_	_
ENSG00000241537	-3.98448	-2.33051	0.0398087	0.279516	RP11-624D20.1	K12842	_
ENSG00000260008	-3.98448	-2.33051	0.0398114	0.279516	RP11-732A21.2	_	_
ENSG00000235112	-3.98448	-2.33051	0.0398143	0.279516	HSPE1P27	_	_
ENSG00000250551	-3.98294	-2.33054	0.0395321	0.278405	RP11-254I22.1	_	_
ENSG00000187172	-3.98294	-2.33054	0.0395348	0.278405	BAGE2	_	cellular_component:extracellular region(GO:0005576)
ENSG00000166035	-3.98294	-2.33054	0.039539	0.278405	LIPC	K01046	molecular_function:phospholipase activity(GO:0004620);molecular_function:triglyceride lipase activity(GO:0004806);cellular_component:extracellular region(GO:0005576);cellular_component:extracellular space(GO:0005615);biological_process:lipid metabolic process(GO:0006629);biological_process:fatty acid biosynthetic process(GO:0006633);molecular_function:heparin binding(GO:0008201);biological_proces…
ENSG00000197361	-3.98294	-2.33054	0.0395407	0.278405	FBXL22	K10288	biological_process:protein ubiquitination(GO:0016567);cellular_component:Z disc(GO:0030018)
ENSG00000214711	-3.98073	-2.33059	0.0393307	0.27725	CAPN14	K13442	molecular_function:calcium-dependent cysteine-type endopeptidase activity(GO:0004198);molecular_function:calcium ion binding(GO:0005509);cellular_component:intracellular(GO:0005622);biological_process:proteolysis(GO:0006508)
ENSG00000182782	-3.98073	-2.33059	0.039335	0.27725	HCAR2	K08402	biological_process:neutrophil apoptotic process(GO:0001781);cellular_component:plasma membrane(GO:0005886);cellular_component:integral component of membrane(GO:0016021);biological_process:positive regulation of neutrophil apoptotic process(GO:0033031);biological_process:negative regulation of lipid catabolic process(GO:0050995);biological_process:positive regulation of adiponectin secretion(GO:00…
ENSG00000222069	-3.98073	-2.33059	0.0393383	0.27725	RN7SKP285	_	_
ENSG00000197893	-3.9744	-2.33062	0.0483221	0.324078	NRAP	_	molecular_function:actin binding(GO:0003779);cellular_component:fascia adherens(GO:0005916);cellular_component:muscle tendon junction(GO:0005927);biological_process:biological_process(GO:0008150);molecular_function:zinc ion binding(GO:0008270);molecular_function:vinculin binding(GO:0017166);cellular_component:myofibril(GO:0030016);molecular_function:muscle alpha-actinin binding(GO:0051371)
ENSG00000154478	-3.9744	-2.33062	0.0483221	0.324078	GPR26	K08411	molecular_function:G-protein coupled receptor activity(GO:0004930);cellular_component:plasma membrane(GO:0005886);biological_process:adenylate cyclase-activating G-protein coupled receptor signaling pathway(GO:0007189);cellular_component:integral component of membrane(GO:0016021)
ENSG00000165929	-3.9744	-2.33062	0.0483221	0.324078	TC2N	_	cellular_component:nucleus(GO:0005634)
ENSG00000115718	-3.9744	-2.33062	0.0483221	0.324078	PROC	K01344	molecular_function:serine-type endopeptidase activity(GO:0004252);molecular_function:calcium ion binding(GO:0005509);molecular_function:protein binding(GO:0005515);cellular_component:extracellular region(GO:0005576);cellular_component:endoplasmic reticulum lumen(GO:0005788);cellular_component:Golgi lumen(GO:0005796);cellular_component:plasma membrane(GO:0005886);biological_process:proteolysis(GO:…
ENSG00000184156	-3.9744	-2.33062	0.0483221	0.324078	KCNQ3	K04928	molecular_function:voltage-gated potassium channel activity(GO:0005249);molecular_function:delayed rectifier potassium channel activity(GO:0005251);molecular_function:potassium channel activity(GO:0005267);cellular_component:plasma membrane(GO:0005886);biological_process:potassium ion transport(GO:0006813);biological_process:synaptic transmission(GO:0007268);biological_process:axon guidance(GO:00…
ENSG00000187601	-3.9744	-2.33062	0.0483221	0.324078	MAGEH1	_	cellular_component:cytoplasm(GO:0005737);biological_process:apoptotic process(GO:0006915)
ENSG00000273473	-3.97218	-2.33067	0.0455278	0.31163	LL09NC01-139C3.1	_	_
ENSG00000089169	-3.97218	-2.33067	0.0455379	0.31163	RPH3A	_	molecular_function:transporter activity(GO:0005215);molecular_function:calcium ion binding(GO:0005509);molecular_function:protein binding(GO:0005515);molecular_function:calcium-dependent phospholipid binding(GO:0005544);biological_process:intracellular protein transport(GO:0006886);cellular_component:synaptic vesicle(GO:0008021);cellular_component:membrane(GO:0016020);molecular_function:Rab GTPas…
ENSG00000253372	-3.97218	-2.33067	0.0455391	0.31163	RP11-44N11.1	_	_
ENSG00000232134	-3.97217	-2.33067	0.045549	0.31163	RPS15AP12	K02957	_
ENSG00000268894	-3.96646	-2.33072	0.0842704	0.491854	PLCE1-AS1	_	_
ENSG00000160321	-3.96646	-2.33072	0.0842704	0.491854	ZNF208	K09228	molecular_function:nucleic acid binding(GO:0003676);molecular_function:DNA binding(GO:0003677);cellular_component:intracellular(GO:0005622);cellular_component:nucleus(GO:0005634);biological_process:transcription, DNA-templated(GO:0006351);biological_process:regulation of transcription, DNA-templated(GO:0006355);molecular_function:zinc ion binding(GO:0008270)
ENSG00000255148	-3.96389	-2.33075	0.0842704	0.491854	RP4-791M13.4	_	_
ENSG00000183230	-3.96389	-2.33075	0.0842704	0.491854	CTNNA3	K05691	molecular_function:structural molecule activity(GO:0005198);molecular_function:protein binding(GO:0005515);cellular_component:cytoplasm(GO:0005737);cellular_component:fascia adherens(GO:0005916);biological_process:cell adhesion(GO:0007155);cellular_component:actin cytoskeleton(GO:0015629);biological_process:single organismal cell-cell adhesion(GO:0016337);cellular_component:lamellipodium(GO:00300…
ENSG00000269043	-3.96389	-2.33075	0.0842704	0.491854	CTC-513N18.6	_	_
ENSG00000188517	-3.96389	-2.33075	0.0842704	0.491854	COL25A1	_	molecular_function:beta-amyloid binding(GO:0001540);cellular_component:extracellular region(GO:0005576);cellular_component:collagen trimer(GO:0005581);cellular_component:extracellular space(GO:0005615);cellular_component:endoplasmic reticulum lumen(GO:0005788);cellular_component:plasma membrane(GO:0005886);cellular_component:integral component of plasma membrane(GO:0005887);molecular_function:hep…
ENSG00000215218	-3.96389	-2.33075	0.0842704	0.491854	UBE2QL1	K10582	molecular_function:ubiquitin-protein transferase activity(GO:0004842);molecular_function:ATP binding(GO:0005524)
ENSG00000138829	-3.96389	-2.33075	0.0842704	0.491854	FBN2	K06825	cellular_component:microfibril(GO:0001527);molecular_function:extracellular matrix structural constituent(GO:0005201);molecular_function:calcium ion binding(GO:0005509);cellular_component:extracellular region(GO:0005576);cellular_component:proteinaceous extracellular matrix(GO:0005578);biological_process:anatomical structure morphogenesis(GO:0009653);biological_process:extracellular matrix organi…
ENSG00000112319	-3.96389	-2.33075	0.0842704	0.491854	EYA4	K17622	molecular_function:protein tyrosine phosphatase activity(GO:0004725);cellular_component:nucleus(GO:0005634);cellular_component:cytoplasm(GO:0005737);biological_process:DNA repair(GO:0006281);biological_process:transcription, DNA-templated(GO:0006351);biological_process:regulation of transcription, DNA-templated(GO:0006355);biological_process:multicellular organismal development(GO:0007275);biolog…
ENSG00000030304	-3.96389	-2.33075	0.0842704	0.491854	MUSK	K05129	biological_process:positive regulation of protein phosphorylation(GO:0001934);molecular_function:protein kinase activity(GO:0004672);molecular_function:protein tyrosine kinase activity(GO:0004713);molecular_function:transmembrane receptor protein tyrosine kinase activity(GO:0004714);molecular_function:protein binding(GO:0005515);molecular_function:ATP binding(GO:0005524);cellular_component:integr…
ENSG00000270040	-3.95993	-2.3308	0.0842704	0.491854	RP11-416A14.1	_	_
ENSG00000188906	-3.95993	-2.3308	0.0842704	0.491854	LRRK2	K08844	biological_process:MAPK cascade(GO:0000165);biological_process:activation of MAPKK activity(GO:0000186);biological_process:activation of MAPK activity(GO:0000187);biological_process:positive regulation of protein phosphorylation(GO:0001934);molecular_function:GTPase activity(GO:0003924);molecular_function:protein kinase activity(GO:0004672);molecular_function:protein serine/threonine kinase activ…
ENSG00000233557	-3.95342	-2.33088	0.0842704	0.491854	NFU1P2	_	_
ENSG00000243038	-3.95342	-2.33088	0.0842704	0.491854	RP11-58E21.1	K01557	_
ENSG00000172653	-3.95342	-2.33088	0.0842704	0.491854	C17orf66	_	_
ENSG00000268987	-3.95342	-2.33088	0.0842704	0.491854	CTC-435M10.10	_	_
ENSG00000236811	-3.95342	-2.33088	0.0842704	0.491854	GAPDHP2	K00134	_
ENSG00000196620	-3.95342	-2.33088	0.0842704	0.491854	UGT2B15	K00699	molecular_function:retinoic acid binding(GO:0001972);cellular_component:endoplasmic reticulum membrane(GO:0005789);biological_process:xenobiotic metabolic process(GO:0006805);biological_process:steroid metabolic process(GO:0008202);molecular_function:glucuronosyltransferase activity(GO:0015020);cellular_component:integral component of membrane(GO:0016021);biological_process:cellular glucuronidati…
ENSG00000257953	-3.88916	-1.33168	2.23e-05	0.000425024	RP11-620J15.1	_	_
ENSG00000222629	-3.76791	-2.41258	0.0842704	0.491854	RNU2-42P	_	_
ENSG00000196136	-3.76791	-2.41258	0.0842704	0.491854	SERPINA3	K04525	molecular_function:DNA binding(GO:0003677);molecular_function:serine-type endopeptidase inhibitor activity(GO:0004867);molecular_function:protein binding(GO:0005515);cellular_component:extracellular region(GO:0005576);cellular_component:intracellular(GO:0005622);cellular_component:nucleus(GO:0005634);biological_process:acute-phase response(GO:0006953);biological_process:inflammatory response(GO:0…
ENSG00000127533	-3.76791	-2.41258	0.0842704	0.491854	F2RL3	K04236	cellular_component:extracellular region(GO:0005576);cellular_component:plasma membrane(GO:0005886);cellular_component:integral component of plasma membrane(GO:0005887);biological_process:signal transduction(GO:0007165);biological_process:phospholipase C-activating G-protein coupled receptor signaling pathway(GO:0007200);biological_process:blood coagulation(GO:0007596);biological_process:response …
ENSG00000251604	-3.7637	-2.41263	0.0842704	0.491854	RP11-79P5.7	_	_
ENSG00000253282	-3.7637	-2.41263	0.0842704	0.491854	KB-1410C5.3	_	_
ENSG00000177098	-3.75951	-2.41268	0.0842704	0.491854	SCN4B	K04848	cellular_component:voltage-gated sodium channel complex(GO:0001518);molecular_function:voltage-gated sodium channel activity(GO:0005248);biological_process:sodium ion transport(GO:0006814);biological_process:positive regulation of sodium ion transport(GO:0010765);cellular_component:intercalated disc(GO:0014704);molecular_function:sodium channel regulator activity(GO:0017080);biological_process:so…
ENSG00000140090	-3.75951	-2.41268	0.0842704	0.491854	SLC24A4	K13752	cellular_component:plasma membrane(GO:0005886);biological_process:ion transport(GO:0006811);biological_process:potassium ion transport(GO:0006813);biological_process:sodium ion transport(GO:0006814);biological_process:calcium ion transport(GO:0006816);molecular_function:symporter activity(GO:0015293);molecular_function:antiporter activity(GO:0015297);cellular_component:integral component of membr…
ENSG00000266176	-3.75951	-2.41268	0.0842704	0.491854	RP11-855A2.5	_	_
ENSG00000270941	-3.75951	-2.41268	0.0842704	0.491854	RP5-966M1.5	K00944	_
ENSG00000215284	-3.75951	-2.41268	0.0842704	0.491854	RP11-198M15.1	K12198	_
ENSG00000149575	-3.75675	-2.41271	0.0842704	0.491854	SCN2B	K04846	cellular_component:voltage-gated sodium channel complex(GO:0001518);biological_process:synaptic transmission(GO:0007268);biological_process:nervous system development(GO:0007399);molecular_function:sodium channel regulator activity(GO:0017080);biological_process:sodium ion transmembrane transport(GO:0035725);biological_process:response to pyrethroid(GO:0046684);biological_process:cardiac muscle c…
ENSG00000184293	-3.75675	-2.41271	0.0842704	0.491854	CLECL1	K17518	cellular_component:plasma membrane(GO:0005886);cellular_component:integral component of membrane(GO:0016021)
ENSG00000173157	-3.75675	-2.41271	0.0842704	0.491854	ADAMTS20	K09609	molecular_function:metalloendopeptidase activity(GO:0004222);cellular_component:proteinaceous extracellular matrix(GO:0005578);biological_process:proteolysis(GO:0006508);molecular_function:zinc ion binding(GO:0008270);cellular_component:extracellular matrix(GO:0031012)
ENSG00000060709	-3.75675	-2.41271	0.0842704	0.491854	RIMBP2	K17591	cellular_component:plasma membrane(GO:0005886);biological_process:negative regulation of phosphatase activity(GO:0010923);cellular_component:cell junction(GO:0030054);cellular_component:synapse(GO:0045202)
ENSG00000170820	-3.75675	-2.41271	0.0842704	0.491854	FSHR	K04247	biological_process:primary ovarian follicle growth(GO:0001545);biological_process:regulation of protein phosphorylation(GO:0001932);biological_process:regulation of systemic arterial blood pressure(GO:0003073);molecular_function:follicle-stimulating hormone receptor activity(GO:0004963);molecular_function:protein binding(GO:0005515);cellular_component:endosome(GO:0005768);cellular_component:plasm…
ENSG00000173253	-3.75675	-2.41271	0.0842704	0.491854	DMRT2	K19489	molecular_function:molecular_function(GO:0003674);molecular_function:sequence-specific DNA binding transcription factor activity(GO:0003700);cellular_component:cellular_component(GO:0005575);cellular_component:nucleus(GO:0005634);biological_process:transcription, DNA-templated(GO:0006351);biological_process:sex determination(GO:0007530);biological_process:biological_process(GO:0008150);biological…
ENSG00000250423	-3.75675	-2.41271	0.0842704	0.491854	KIAA1210	K17985	_
ENSG00000256500	-3.75531	-2.41272	0.0842704	0.491854	RP11-73M18.2	K10407	_
ENSG00000267373	-3.75531	-2.41272	0.0842704	0.491854	CTD-2231E14.5	_	_
ENSG00000272969	-3.75531	-2.41272	0.0842704	0.491854	RP11-528I4.2	_	_
ENSG00000183638	-3.75531	-2.41272	0.0842704	0.491854	RP1L1	K19538	cellular_component:photoreceptor outer segment(GO:0001750);cellular_component:microtubule(GO:0005874);biological_process:visual perception(GO:0007601);biological_process:cell projection organization(GO:0030030);cellular_component:photoreceptor connecting cilium(GO:0032391);;biological_process:intracellular signal transduction(GO:0035556);biological_process:photoreceptor cell development(GO:004246…
ENSG00000158813	-3.75157	-2.41276	0.0817946	0.489846	EDA	_	molecular_function:receptor binding(GO:0005102);molecular_function:tumor necrosis factor receptor binding(GO:0005164);molecular_function:protein binding(GO:0005515);cellular_component:collagen trimer(GO:0005581);cellular_component:endoplasmic reticulum membrane(GO:0005789);cellular_component:cytoskeleton(GO:0005856);cellular_component:plasma membrane(GO:0005886);cellular_component:integral compon…
ENSG00000142748	-3.75157	-2.41276	0.0817894	0.489846	FCN3	K10104	biological_process:complement activation, lectin pathway(GO:0001867);molecular_function:protein binding(GO:0005515);cellular_component:extracellular region(GO:0005576);cellular_component:collagen trimer(GO:0005581);biological_process:complement activation(GO:0006956);molecular_function:carbohydrate binding(GO:0030246);biological_process:innate immune response(GO:0045087)
ENSG00000249494	-3.75156	-2.41276	0.0817781	0.489846	CTB-161M19.4	_	_
ENSG00000179299	-3.75156	-2.41276	0.0817755	0.489846	NSUN7	_	molecular_function:methyltransferase activity(GO:0008168)
ENSG00000112183	-3.75156	-2.41276	0.0817741	0.489846	RBM24	_	molecular_function:nucleotide binding(GO:0000166);molecular_function:nucleic acid binding(GO:0003676);molecular_function:mRNA 3'-UTR binding(GO:0003730);cellular_component:nucleus(GO:0005634);cellular_component:cytoplasm(GO:0005737);biological_process:regulation of myotube differentiation(GO:0010830);biological_process:cell differentiation(GO:0030154);biological_process:regulation of mRNA stabili…
ENSG00000232698	-3.75113	-2.41277	0.0842704	0.491854	AP001058.3	_	_
ENSG00000227203	-3.75113	-2.41277	0.0842704	0.491854	SUB1P1	_	_
ENSG00000078900	-3.74563	-2.41284	0.0842704	0.491854	TP73	K10148	biological_process:negative regulation of transcription from RNA polymerase II promoter(GO:0000122);biological_process:activation of MAPK activity(GO:0000187);cellular_component:chromatin(GO:0000785);biological_process:kidney development(GO:0001822);biological_process:release of cytochrome c from mitochondria(GO:0001836);molecular_function:p53 binding(GO:0002039);molecular_function:chromatin bind…
ENSG00000049249	-3.74563	-2.41284	0.0842704	0.491854	TNFRSF9	K05146	molecular_function:receptor activity(GO:0004872);cellular_component:extracellular space(GO:0005615);cellular_component:integral component of plasma membrane(GO:0005887);;biological_process:negative regulation of cell proliferation(GO:0008285);cellular_component:external side of plasma membrane(GO:0009897);molecular_function:cytokine binding(GO:0019955);biological_process:protein homotrimerization…
ENSG00000143297	-3.74563	-2.41284	0.0842704	0.491854	FCRL5	K06727	cellular_component:plasma membrane(GO:0005886);cellular_component:integral component of membrane(GO:0016021)
ENSG00000197721	-3.74563	-2.41284	0.0842704	0.491854	CR1L	K04011	cellular_component:extracellular region(GO:0005576);cellular_component:cytoplasm(GO:0005737);cellular_component:membrane(GO:0016020)
ENSG00000182771	-3.74563	-2.41284	0.0842704	0.491854	GRID1	K05206	molecular_function:ionotropic glutamate receptor activity(GO:0004970);molecular_function:extracellular-glutamate-gated ion channel activity(GO:0005234);cellular_component:plasma membrane(GO:0005886);cellular_component:integral component of membrane(GO:0016021);cellular_component:cell junction(GO:0030054);cellular_component:postsynaptic membrane(GO:0045211)
ENSG00000188467	-3.74563	-2.41284	0.0842704	0.491854	SLC24A5	K13753	cellular_component:plasma membrane(GO:0005886);biological_process:ion transport(GO:0006811);biological_process:potassium ion transport(GO:0006813);biological_process:sodium ion transport(GO:0006814);biological_process:calcium ion transport(GO:0006816);molecular_function:symporter activity(GO:0015293);molecular_function:antiporter activity(GO:0015297);cellular_component:integral component of membr…
ENSG00000259452	-3.74563	-2.41284	0.0842704	0.491854	RP11-138H8.4	K02905	_
ENSG00000261564	-3.74563	-2.41284	0.0842704	0.491854	RP11-616M22.10	K01340	_
ENSG00000176387	-3.74563	-2.41284	0.0842704	0.491854	HSD11B2	K00071	biological_process:response to hypoxia(GO:0001666);biological_process:regulation of blood volume by renal aldosterone(GO:0002017);molecular_function:11-beta-hydroxysteroid dehydrogenase [NAD(P)] activity(GO:0003845);molecular_function:steroid binding(GO:0005496);cellular_component:endoplasmic reticulum(GO:0005783);biological_process:glucocorticoid biosynthetic process(GO:0006704);biological_proce…
ENSG00000206043	-3.74563	-2.41284	0.0842704	0.491854	C18orf63	_	_
ENSG00000226856	-3.74563	-2.41284	0.0842704	0.491854	AC093901.1	_	_
ENSG00000124203	-3.74563	-2.41284	0.0842704	0.491854	ZNF831	_	molecular_function:nucleic acid binding(GO:0003676);molecular_function:metal ion binding(GO:0046872)
ENSG00000111879	-3.74563	-2.41284	0.0842704	0.491854	FAM184A	_	molecular_function:molecular_function(GO:0003674);cellular_component:cellular_component(GO:0005575);biological_process:biological_process(GO:0008150)
ENSG00000073067	-3.74563	-2.41284	0.0842704	0.491854	CYP2W1	K07423	molecular_function:monooxygenase activity(GO:0004497);molecular_function:iron ion binding(GO:0005506);cellular_component:endoplasmic reticulum membrane(GO:0005789);biological_process:xenobiotic metabolic process(GO:0006805);molecular_function:electron carrier activity(GO:0009055);molecular_function:oxidoreductase activity, acting on paired donors, with incorporation or reduction of molecular oxyg…
ENSG00000153956	-3.74563	-2.41284	0.0842704	0.491854	CACNA2D1	K04858	molecular_function:voltage-gated calcium channel activity(GO:0005245);cellular_component:voltage-gated calcium channel complex(GO:0005891);biological_process:calcium ion transport(GO:0006816);cellular_component:sarcoplasmic reticulum(GO:0016529);cellular_component:T-tubule(GO:0030315);molecular_function:metal ion binding(GO:0046872);biological_process:regulation of calcium ion transport(GO:005192…
ENSG00000224775	-3.74563	-2.41284	0.0842704	0.491854	BRAFP1	K04365	_
ENSG00000003096	-3.74563	-2.41284	0.0842704	0.491854	KLHL13	K10447	biological_process:cytokinesis(GO:0000910);molecular_function:ubiquitin-protein transferase activity(GO:0004842);biological_process:mitotic nuclear division(GO:0007067);biological_process:protein ubiquitination(GO:0016567);cellular_component:Cul3-RING ubiquitin ligase complex(GO:0031463)
ENSG00000122121	-3.74563	-2.41284	0.0842704	0.491854	XPNPEP2	K14208	molecular_function:aminopeptidase activity(GO:0004177);cellular_component:plasma membrane(GO:0005886);biological_process:proteolysis(GO:0006508);molecular_function:metallopeptidase activity(GO:0008237);biological_process:cellular process(GO:0009987);cellular_component:membrane(GO:0016020);molecular_function:hydrolase activity(GO:0016787);cellular_component:anchored component of membrane(GO:003122…
ENSG00000140600	-3.74557	-2.4128	0.0743224	0.455123	SH3GL3	K11247	molecular_function:protein binding(GO:0005515);cellular_component:cytoplasm(GO:0005737);biological_process:endocytosis(GO:0006897);biological_process:signal transduction(GO:0007165);biological_process:central nervous system development(GO:0007417);molecular_function:lipid binding(GO:0008289);cellular_component:early endosome membrane(GO:0031901);molecular_function:identical protein binding(GO:004…
ENSG00000214513	-3.74557	-2.4128	0.074322	0.455123	NOTO	K17985	molecular_function:sequence-specific DNA binding transcription factor activity(GO:0003700);cellular_component:nucleus(GO:0005634);biological_process:transcription, DNA-templated(GO:0006351);biological_process:determination of left/right symmetry(GO:0007368);biological_process:embryonic pattern specification(GO:0009880);biological_process:dorsal/ventral pattern formation(GO:0009953);biological_pro…
ENSG00000213988	-3.74557	-2.4128	0.0743181	0.455123	ZNF90	K02960	molecular_function:nucleic acid binding(GO:0003676);molecular_function:DNA binding(GO:0003677);molecular_function:sequence-specific DNA binding transcription factor activity(GO:0003700);cellular_component:intracellular(GO:0005622);cellular_component:nucleus(GO:0005634);cellular_component:Golgi apparatus(GO:0005794);biological_process:transcription, DNA-templated(GO:0006351);biological_process:reg…
ENSG00000253929	-3.74557	-2.4128	0.0743146	0.455123	RP11-382A18.2	_	_
ENSG00000248473	-3.74557	-2.4128	0.0743142	0.455123	CTC-338M12.2	_	_
ENSG00000256712	-3.74377	-2.41285	0.0803344	0.483259	RP11-785H5.2	_	_
ENSG00000005961	-3.74377	-2.41285	0.0803254	0.483259	ITGA2B	K06476	biological_process:platelet degranulation(GO:0002576);molecular_function:protein binding(GO:0005515);cellular_component:plasma membrane(GO:0005886);cellular_component:integral component of plasma membrane(GO:0005887);cellular_component:focal adhesion(GO:0005925);biological_process:cell adhesion(GO:0007155);biological_process:cell-matrix adhesion(GO:0007160);biological_process:integrin-mediated si…
ENSG00000007314	-3.74376	-2.41285	0.080311	0.483259	SCN4A	K04837	cellular_component:voltage-gated sodium channel complex(GO:0001518);molecular_function:voltage-gated sodium channel activity(GO:0005248);cellular_component:integral component of plasma membrane(GO:0005887);biological_process:sodium ion transport(GO:0006814);biological_process:muscle contraction(GO:0006936)
ENSG00000214111	-3.74376	-2.41285	0.0803	0.483259	RP1-258N20.3	K16795	_
ENSG00000128652	-3.74149	-1.4143	0.000230865	0.00347047	HOXD3	K09303	molecular_function:sequence-specific DNA binding transcription factor activity(GO:0003700);molecular_function:protein binding(GO:0005515);cellular_component:nucleus(GO:0005634);biological_process:transcription, DNA-templated(GO:0006351);biological_process:cell-matrix adhesion(GO:0007160);biological_process:Notch signaling pathway(GO:0007219);biological_process:anterior/posterior pattern specifica…
ENSG00000182533	-3.74123	-2.41288	0.0738122	0.452716	CAV3	K12959	cellular_component:Golgi membrane(GO:0000139);biological_process:plasma membrane repair(GO:0001778);biological_process:regulation of heart rate(GO:0002027);molecular_function:calcium channel regulator activity(GO:0005246);molecular_function:protein binding(GO:0005515);cellular_component:endoplasmic reticulum(GO:0005783);cellular_component:plasma membrane(GO:0005886);cellular_component:caveola(GO:…
ENSG00000248483	-3.74123	-2.41288	0.0738119	0.452716	POU5F2	K09367	molecular_function:sequence-specific DNA binding transcription factor activity(GO:0003700);cellular_component:nucleus(GO:0005634);biological_process:transcription, DNA-templated(GO:0006351);molecular_function:sequence-specific DNA binding(GO:0043565)
ENSG00000249764	-3.74123	-2.41288	0.0738109	0.452716	RP11-1299A16.1	_	_
ENSG00000106436	-3.74123	-2.41288	0.0738086	0.452716	MYL10	K12756	molecular_function:calcium ion binding(GO:0005509);cellular_component:mitochondrion(GO:0005739)
ENSG00000150165	-3.74123	-2.41288	0.0738011	0.452716	ANXA8L1	K17096	molecular_function:calcium ion binding(GO:0005509);molecular_function:calcium-dependent phospholipid binding(GO:0005544)
ENSG00000165973	-3.74123	-2.41288	0.0738009	0.452716	NELL1	K00030	molecular_function:calcium ion binding(GO:0005509);molecular_function:protein binding(GO:0005515);cellular_component:extracellular region(GO:0005576);cellular_component:nuclear envelope(GO:0005635);cellular_component:cytoplasm(GO:0005737);biological_process:nervous system development(GO:0007399);biological_process:regulation of gene expression(GO:0010468);biological_process:cell differentiation(G…
ENSG00000099715	-3.74123	-2.41288	0.0738006	0.452716	PCDH11Y	K16498	molecular_function:calcium ion binding(GO:0005509);cellular_component:plasma membrane(GO:0005886);biological_process:homophilic cell adhesion via plasma membrane adhesion molecules(GO:0007156);cellular_component:integral component of membrane(GO:0016021)
ENSG00000148513	-3.74123	-2.41288	0.0737973	0.452716	ANKRD30A	K17299	molecular_function:DNA binding(GO:0003677);molecular_function:sequence-specific DNA binding transcription factor activity(GO:0003700);cellular_component:nucleus(GO:0005634);biological_process:regulation of transcription, DNA-templated(GO:0006355)
ENSG00000243478	-3.74003	-2.4129	0.0842704	0.491854	AOX2P	K00157	_
ENSG00000120498	-3.73881	-2.41293	0.0734665	0.451617	TEX11	K04264	biological_process:resolution of meiotic recombination intermediates(GO:0000712);cellular_component:synaptonemal complex(GO:0000795);cellular_component:central element(GO:0000801);molecular_function:protein binding(GO:0005515);biological_process:meiotic gene conversion(GO:0006311);biological_process:male meiosis chromosome segregation(GO:0007060);biological_process:synaptonemal complex assembly(G…
ENSG00000235664	-3.73881	-2.41293	0.0734668	0.451617	AC005682.8	_	_
ENSG00000199806	-3.73881	-2.41293	0.0734691	0.451617	RNA5SP491	_	_
ENSG00000207451	-3.73455	-2.41296	0.0842704	0.491854	RNU6-291P	_	_
ENSG00000186094	-3.73455	-2.41296	0.0842704	0.491854	AGBL4	_	molecular_function:metallocarboxypeptidase activity(GO:0004181);cellular_component:cytosol(GO:0005829);biological_process:proteolysis(GO:0006508);molecular_function:zinc ion binding(GO:0008270);molecular_function:tubulin binding(GO:0015631);biological_process:C-terminal protein deglutamylation(GO:0035609);biological_process:protein side chain deglutamylation(GO:0035610)
ENSG00000162409	-3.73455	-2.41296	0.0842704	0.491854	PRKAA2	K07198	molecular_function:chromatin binding(GO:0003682);molecular_function:protein kinase activity(GO:0004672);molecular_function:protein serine/threonine kinase activity(GO:0004674);molecular_function:AMP-activated protein kinase activity(GO:0004679);molecular_function:protein binding(GO:0005515);molecular_function:ATP binding(GO:0005524);cellular_component:nucleoplasm(GO:0005654);cellular_component:cy…
ENSG00000230285	-3.73455	-2.41296	0.0842704	0.491854	RP11-290M5.2	_	_
ENSG00000225171	-3.73455	-2.41296	0.0842704	0.491854	DUTP6	K01520	_
ENSG00000255308	-3.73455	-2.41296	0.0842704	0.491854	RP11-428C19.4	_	_
ENSG00000197629	-3.73455	-2.41296	0.0842704	0.491854	MPEG1	_	cellular_component:integral component of membrane(GO:0016021)
ENSG00000013725	-3.73455	-2.41296	0.0842704	0.491854	CD6	K06456	molecular_function:scavenger receptor activity(GO:0005044);cellular_component:integral component of plasma membrane(GO:0005887);biological_process:cell adhesion(GO:0007155);cellular_component:cell surface(GO:0009986);cellular_component:membrane(GO:0016020)
ENSG00000151952	-3.73455	-2.41296	0.0842704	0.491854	TMEM132D	K17599	molecular_function:molecular_function(GO:0003674);molecular_function:protein binding(GO:0005515);biological_process:biological_process(GO:0008150);biological_process:negative regulation of phosphatase activity(GO:0010923);cellular_component:integral component of membrane(GO:0016021)
ENSG00000236953	-3.73455	-2.41296	0.0842704	0.491854	ZDHHC20-IT1	_	_
ENSG00000137841	-3.73455	-2.41296	0.0842704	0.491854	PLCB2	K05858	molecular_function:phosphatidylinositol phospholipase C activity(GO:0004435);molecular_function:phospholipase C activity(GO:0004629);molecular_function:signal transducer activity(GO:0004871);molecular_function:calcium ion binding(GO:0005509);cellular_component:cytosol(GO:0005829);biological_process:lipid metabolic process(GO:0006629);biological_process:phospholipid metabolic process(GO:0006644);b…
ENSG00000171804	-3.73455	-2.41296	0.0842704	0.491854	WDR87	_	_
ENSG00000180483	-3.73455	-2.41296	0.0842704	0.491854	DEFB119	_	cellular_component:extracellular region(GO:0005576);biological_process:defense response to bacterium(GO:0042742)
ENSG00000019186	-3.73455	-2.41296	0.0842704	0.491854	CYP24A1	K07436	biological_process:osteoblast differentiation(GO:0001649);molecular_function:iron ion binding(GO:0005506);cellular_component:mitochondrial inner membrane(GO:0005743);biological_process:vitamin metabolic process(GO:0006766);biological_process:xenobiotic metabolic process(GO:0006805);biological_process:steroid metabolic process(GO:0008202);molecular_function:25-hydroxycholecalciferol-24-hydroxylase…
ENSG00000177398	-3.73455	-2.41296	0.0842704	0.491854	UMODL1	_	molecular_function:calcium ion binding(GO:0005509);cellular_component:extracellular space(GO:0005615);cellular_component:cytoplasm(GO:0005737);cellular_component:external side of plasma membrane(GO:0009897);cellular_component:integral component of membrane(GO:0016021);molecular_function:peptidase inhibitor activity(GO:0030414)
ENSG00000235265	-3.73455	-2.41296	0.0842704	0.491854	LA16c-4G1.5	_	_
ENSG00000183960	-3.73455	-2.41296	0.0842704	0.491854	KCNH8	K04911	molecular_function:phosphorelay sensor kinase activity(GO:0000155);molecular_function:voltage-gated potassium channel activity(GO:0005249);cellular_component:plasma membrane(GO:0005886);cellular_component:integral component of plasma membrane(GO:0005887);biological_process:synaptic transmission(GO:0007268);cellular_component:membrane(GO:0016020);biological_process:regulation of membrane potential…
ENSG00000185313	-3.73455	-2.41296	0.0842704	0.491854	SCN10A	K04842	cellular_component:voltage-gated sodium channel complex(GO:0001518);biological_process:regulation of heart rate(GO:0002027);molecular_function:voltage-gated sodium channel activity(GO:0005248);biological_process:sodium ion transport(GO:0006814);biological_process:sensory perception(GO:0007600);biological_process:sensory perception of pain(GO:0019233);biological_process:regulation of ion transmemb…
ENSG00000206675	-3.73455	-2.41296	0.0842704	0.491854	RNU6-32P	_	_
ENSG00000251577	-3.73455	-2.41296	0.0842704	0.491854	RP11-297P16.3	_	_
ENSG00000150627	-3.73455	-2.41296	0.0842704	0.491854	WDR17	_	_
ENSG00000250829	-3.73455	-2.41296	0.0842704	0.491854	RP11-11N5.1	_	_
ENSG00000137251	-3.73455	-2.41296	0.0842704	0.491854	TINAG	_	molecular_function:nucleotide binding(GO:0000166);molecular_function:cysteine-type endopeptidase activity(GO:0004197);molecular_function:scavenger receptor activity(GO:0005044);cellular_component:basement membrane(GO:0005604);biological_process:proteolysis(GO:0006508);biological_process:immune response(GO:0006955);biological_process:cell adhesion(GO:0007155);molecular_function:cysteine-type pepti…
ENSG00000225907	-3.73455	-2.41296	0.0842704	0.491854	RPS27P16	K02978	_
ENSG00000221520	-3.73455	-2.41296	0.0842704	0.491854	MIR1285-1	_	_
ENSG00000130226	-3.73455	-2.41296	0.0842704	0.491854	DPP6	K04460	biological_process:proteolysis(GO:0006508);biological_process:cell death(GO:0008219);molecular_function:serine-type peptidase activity(GO:0008236);molecular_function:dipeptidyl-peptidase activity(GO:0008239);cellular_component:membrane(GO:0016020);cellular_component:integral component of membrane(GO:0016021);biological_process:neuronal action potential(GO:0019228);biological_process:regulation of…
ENSG00000231344	-3.73313	-2.41298	0.0842704	0.491854	RP3-426I6.2	_	_
ENSG00000170962	-3.73313	-2.41298	0.0842704	0.491854	PDGFD	K05450	cellular_component:Golgi membrane(GO:0000139);molecular_function:platelet-derived growth factor receptor binding(GO:0005161);cellular_component:extracellular region(GO:0005576);cellular_component:endoplasmic reticulum lumen(GO:0005788);biological_process:multicellular organismal development(GO:0007275);molecular_function:growth factor activity(GO:0008083);biological_process:regulation of peptidyl…
ENSG00000235768	-3.73313	-2.41298	0.0842704	0.491854	BRD7P5	K11723	_
ENSG00000259192	-3.73313	-2.41298	0.0842704	0.491854	AC109631.1	K15731	_
ENSG00000261325	-3.73313	-2.41298	0.0842704	0.491854	AC140542.2	_	_
ENSG00000241868	-3.73313	-2.41298	0.0842704	0.491854	RN7SL434P	_	_
ENSG00000272128	-3.73274	-2.41301	0.0780421	0.473309	KB-1836B5.4	_	_
ENSG00000120329	-3.73274	-2.41301	0.0780516	0.473309	SLC25A2	K15101	biological_process:urea cycle(GO:0000050);molecular_function:L-ornithine transmembrane transporter activity(GO:0000064);biological_process:mitochondrial ornithine transport(GO:0000066);cellular_component:mitochondrial inner membrane(GO:0005743);cellular_component:integral component of membrane(GO:0016021);biological_process:cellular nitrogen compound metabolic process(GO:0034641);biological_proce…
ENSG00000244226	-3.73273	-2.41301	0.0780618	0.473309	ILF2P1	K13089	_
ENSG00000222022	-3.73273	-2.41301	0.0780683	0.473309	AC112721.1	_	_
ENSG00000243179	-3.73272	-2.41301	0.078077	0.473309	AC110769.3	_	_
ENSG00000272420	-3.73272	-2.41301	0.0780796	0.473309	RP4-740C4.7	_	_
ENSG00000206762	-3.73272	-2.41301	0.0780812	0.473309	RNU6-418P	_	_
ENSG00000064489	-3.73272	-2.41301	0.0780842	0.473309	MEF2BNB-MEF2B	K09261	_
ENSG00000260432	-3.73272	-2.41301	0.0780929	0.473309	RP11-297M9.2	_	_
ENSG00000223470	-3.73272	-2.41301	0.0781001	0.473309	RP11-490O24.2	_	_
ENSG00000259020	-3.73271	-2.41301	0.0781014	0.473309	RP11-529H20.3	K13784	_
ENSG00000271806	-3.72624	-2.41306	0.0842704	0.491854	RP5-892K4.1	_	_
ENSG00000234544	-3.72624	-2.41306	0.0842704	0.491854	PTGES3P5	_	_
ENSG00000170627	-3.72624	-2.41306	0.0842704	0.491854	GTSF1	_	cellular_component:cytoplasm(GO:0005737);molecular_function:metal ion binding(GO:0046872)
ENSG00000108924	-3.72624	-2.41306	0.0842704	0.491854	HLF	K09057	molecular_function:DNA binding(GO:0003677);molecular_function:double-stranded DNA binding(GO:0003690);molecular_function:sequence-specific DNA binding transcription factor activity(GO:0003700);cellular_component:nucleus(GO:0005634);biological_process:transcription from RNA polymerase II promoter(GO:0006366);biological_process:multicellular organismal development(GO:0007275);biological_process:ske…
ENSG00000188269	-3.72624	-2.41306	0.0842704	0.491854	OR7A5	K04257	molecular_function:G-protein coupled receptor activity(GO:0004930);molecular_function:olfactory receptor activity(GO:0004984);cellular_component:plasma membrane(GO:0005886);biological_process:sensory perception of smell(GO:0007608);cellular_component:integral component of membrane(GO:0016021);biological_process:detection of chemical stimulus involved in sensory perception of smell(GO:0050911)
ENSG00000167748	-3.72624	-2.41306	0.0842704	0.491854	KLK1	K09623	molecular_function:serine-type endopeptidase activity(GO:0004252);cellular_component:nucleus(GO:0005634);biological_process:proteolysis(GO:0006508)
ENSG00000224220	-3.72624	-2.41306	0.0842704	0.491854	AC104699.1	_	_
ENSG00000220695	-3.72624	-2.41306	0.0842704	0.491854	RP1-121G13.3	K17822	_
ENSG00000254248	-3.72624	-2.41306	0.0842704	0.491854	RP11-320N21.2	_	_
ENSG00000183690	-3.72624	-2.41306	0.0842704	0.491854	EFHC2	_	molecular_function:calcium ion binding(GO:0005509)
ENSG00000183542	-3.72486	-0.128954	4.11e-12	2.16e-10	KLRC4	K06541	biological_process:cellular defense response(GO:0006968);cellular_component:integral component of membrane(GO:0016021)
ENSG00000007908	-3.72351	-2.41309	0.0842704	0.491854	SELE	K06494	biological_process:positive regulation of receptor internalization(GO:0002092);biological_process:leukocyte migration involved in inflammatory response(GO:0002523);biological_process:positive regulation of leukocyte migration(GO:0002687);molecular_function:transmembrane signaling receptor activity(GO:0004888);molecular_function:protein binding(GO:0005515);cellular_component:extracellular space(GO…
ENSG00000228816	-3.72351	-2.41309	0.0842704	0.491854	AK3P5	K00944	_
ENSG00000234167	-3.72351	-2.41309	0.0842704	0.491854	TCEB2P4	_	_
ENSG00000169129	-3.72351	-2.41309	0.0842704	0.491854	AFAP1L2	_	molecular_function:phospholipid binding(GO:0005543);cellular_component:nucleus(GO:0005634);cellular_component:cytoplasm(GO:0005737);cellular_component:plasma membrane(GO:0005886);biological_process:inflammatory response(GO:0006954);biological_process:regulation of mitotic cell cycle(GO:0007346);cellular_component:aggresome(GO:0016235);molecular_function:SH3 domain binding(GO:0017124);molecular_fu…
ENSG00000149506	-3.72351	-2.41309	0.0842704	0.491854	ZP1	_	cellular_component:extracellular region(GO:0005576);cellular_component:proteinaceous extracellular matrix(GO:0005578);cellular_component:Golgi apparatus(GO:0005794);cellular_component:plasma membrane(GO:0005886);biological_process:single fertilization(GO:0007338);biological_process:binding of sperm to zona pellucida(GO:0007339);cellular_component:integral component of membrane(GO:0016021);cellula…
ENSG00000178795	-3.72351	-2.41309	0.0842704	0.491854	GDPD4	_	biological_process:glycerol metabolic process(GO:0006071);biological_process:lipid metabolic process(GO:0006629);molecular_function:glycerophosphodiester phosphodiesterase activity(GO:0008889);cellular_component:integral component of membrane(GO:0016021);molecular_function:metal ion binding(GO:0046872)
ENSG00000137727	-3.72351	-2.41309	0.0842704	0.491854	ARHGAP20	_	molecular_function:GTPase activator activity(GO:0005096);molecular_function:phospholipid binding(GO:0005543);cellular_component:cytosol(GO:0005829);biological_process:small GTPase mediated signal transduction(GO:0007264);biological_process:regulation of small GTPase mediated signal transduction(GO:0051056)
ENSG00000165821	-3.72351	-2.41309	0.0842704	0.491854	SALL2	_	biological_process:negative regulation of transcription from RNA polymerase II promoter(GO:0000122);molecular_function:nucleic acid binding(GO:0003676);molecular_function:DNA binding(GO:0003677);molecular_function:sequence-specific DNA binding transcription factor activity(GO:0003700);cellular_component:nucleus(GO:0005634);biological_process:transcription, DNA-templated(GO:0006351);biological_pro…
ENSG00000188089	-3.72351	-2.41309	0.0842704	0.491854	PLA2G4E	K16342	molecular_function:phospholipase activity(GO:0004620);molecular_function:phospholipase A2 activity(GO:0004623);cellular_component:cytoplasm(GO:0005737);cellular_component:lysosomal membrane(GO:0005765);cellular_component:cytosol(GO:0005829);biological_process:phospholipid metabolic process(GO:0006644);biological_process:phospholipid catabolic process(GO:0009395);biological_process:phosphatidylino…
ENSG00000241890	-3.72351	-2.41309	0.0842704	0.491854	RPL13P4	_	_
ENSG00000205325	-3.72351	-2.41309	0.0842704	0.491854	AC005863.1	_	_
ENSG00000214546	-3.72351	-2.41309	0.0842704	0.491854	AC087491.2	_	_
ENSG00000197079	-3.72351	-2.41309	0.0842704	0.491854	KRT35	K07604	molecular_function:structural molecule activity(GO:0005198);cellular_component:intermediate filament(GO:0005882);biological_process:anatomical structure morphogenesis(GO:0009653)
ENSG00000263644	-3.72351	-2.41309	0.0842704	0.491854	RP11-269G24.3	_	_
ENSG00000185008	-3.72351	-2.41309	0.0842704	0.491854	ROBO2	K06754	biological_process:metanephros development(GO:0001656);biological_process:ureteric bud development(GO:0001657);molecular_function:protein binding(GO:0005515);biological_process:cell adhesion(GO:0007155);biological_process:homophilic cell adhesion via plasma membrane adhesion molecules(GO:0007156);biological_process:axon guidance(GO:0007411);biological_process:central nervous system development(GO…
ENSG00000159650	-3.72351	-2.41309	0.0842704	0.491854	UROC1	K01712	cellular_component:cytosol(GO:0005829);biological_process:histidine catabolic process(GO:0006548);molecular_function:urocanate hydratase activity(GO:0016153);biological_process:histidine catabolic process to glutamate and formamide(GO:0019556);biological_process:histidine catabolic process to glutamate and formate(GO:0019557);biological_process:cellular nitrogen compound metabolic process(GO:0034…
ENSG00000122012	-3.72351	-2.41309	0.0842704	0.491854	SV2C	K06258	biological_process:neurotransmitter transport(GO:0006836);cellular_component:integral component of membrane(GO:0016021);molecular_function:transmembrane transporter activity(GO:0022857);cellular_component:cell junction(GO:0030054);cellular_component:synaptic vesicle membrane(GO:0030672)
ENSG00000146530	-3.72351	-2.41309	0.0842704	0.491854	VWDE	_	molecular_function:calcium ion binding(GO:0005509);cellular_component:extracellular region(GO:0005576)
ENSG00000077080	-3.72351	-2.41309	0.0842704	0.491854	ACTL6B	K11652	molecular_function:transcription coactivator activity(GO:0003713);molecular_function:structural constituent of cytoskeleton(GO:0005200);cellular_component:nucleus(GO:0005634);cellular_component:nucleolus(GO:0005730);biological_process:chromatin organization(GO:0006325);biological_process:chromatin remodeling(GO:0006338);biological_process:transcription, DNA-templated(GO:0006351);biological_proces…
ENSG00000176595	-3.72351	-2.41309	0.0842704	0.491854	KBTBD11	K10476	_
ENSG00000165238	-3.72351	-2.41309	0.0842704	0.491854	WNK2	K08867	molecular_function:protein serine/threonine kinase activity(GO:0004674);molecular_function:ATP binding(GO:0005524);cellular_component:cytoplasm(GO:0005737);cellular_component:plasma membrane(GO:0005886);biological_process:protein phosphorylation(GO:0006468);;biological_process:negative regulation of cell proliferation(GO:0008285);molecular_function:transferase activity, transferring phosphorus-co…
ENSG00000101958	-3.72351	-2.41309	0.0842704	0.491854	GLRA2	K05194	molecular_function:extracellular ligand-gated ion channel activity(GO:0005230);cellular_component:plasma membrane(GO:0005886);cellular_component:integral component of plasma membrane(GO:0005887);biological_process:ion transport(GO:0006811);biological_process:neuropeptide signaling pathway(GO:0007218);biological_process:synapse assembly(GO:0007416);molecular_function:glycine binding(GO:0016594);mo…
ENSG00000147113	-3.72351	-2.41309	0.0842704	0.491854	CXorf36	_	cellular_component:extracellular region(GO:0005576)
ENSG00000180720	-3.71936	-2.41314	0.0842704	0.491854	CHRM4	K04132	cellular_component:plasma membrane(GO:0005886);cellular_component:integral component of plasma membrane(GO:0005887);biological_process:signal transduction(GO:0007165);biological_process:cell surface receptor signaling pathway(GO:0007166);biological_process:adenylate cyclase-inhibiting G-protein coupled acetylcholine receptor signaling pathway(GO:0007197);biological_process:G-protein coupled acety…
ENSG00000255655	-3.71936	-2.41314	0.0842704	0.491854	RP11-256L11.3	_	_
ENSG00000260975	-3.71936	-2.41314	0.0842704	0.491854	RP11-142G1.3	_	_
ENSG00000263818	-3.71936	-2.41314	0.0842704	0.491854	CTD-2206N4.4	_	_
ENSG00000267193	-3.71936	-2.41314	0.0842704	0.491854	RP11-116O18.3	_	_
ENSG00000081138	-3.71936	-2.41314	0.0842704	0.491854	CDH7	K06799	molecular_function:calcium ion binding(GO:0005509);cellular_component:plasma membrane(GO:0005886);biological_process:homophilic cell adhesion via plasma membrane adhesion molecules(GO:0007156);cellular_component:integral component of membrane(GO:0016021);biological_process:single organismal cell-cell adhesion(GO:0016337);biological_process:cell junction assembly(GO:0034329);biological_process:adh…
ENSG00000225588	-3.71936	-2.41314	0.0842704	0.491854	AC096669.1	_	_
ENSG00000162739	-3.7125	-2.41322	0.0842704	0.491854	SLAMF6	K16852	molecular_function:receptor activity(GO:0004872);cellular_component:plasma membrane(GO:0005886);cellular_component:integral component of membrane(GO:0016021)
ENSG00000135750	-3.7125	-2.41322	0.0842704	0.491854	KCNK1	K04912	molecular_function:inward rectifier potassium channel activity(GO:0005242);molecular_function:potassium channel activity(GO:0005267);cellular_component:endosome(GO:0005768);cellular_component:plasma membrane(GO:0005886);biological_process:potassium ion transport(GO:0006813);biological_process:synaptic transmission(GO:0007268);cellular_component:voltage-gated potassium channel complex(GO:0008076);…
ENSG00000233725	-3.7125	-2.41322	0.0842704	0.491854	LINC00284	_	_
ENSG00000232872	-3.7125	-2.41322	0.0842704	0.491854	CTAGE3P	_	cellular_component:cellular_component(GO:0005575);biological_process:biological_process(GO:0008150)
ENSG00000236554	-3.7125	-2.41322	0.0842704	0.491854	ASNSP3	K01953	_
ENSG00000264607	-3.7125	-2.41322	0.0842704	0.491854	MIR3173	_	_
ENSG00000259575	-3.7125	-2.41322	0.0842704	0.491854	RP11-39M21.2	_	_
ENSG00000270490	-3.7125	-2.41322	0.0842704	0.491854	RP11-622C24.1	K17800	_
ENSG00000252534	-3.7125	-2.41322	0.0842704	0.491854	Y_RNA	_	_
ENSG00000264630	-3.7125	-2.41322	0.0842704	0.491854	RP11-4F22.2	_	_
ENSG00000267703	-3.7125	-2.41322	0.0842704	0.491854	CTD-2013N17.4	_	_
ENSG00000212182	-3.7125	-2.41322	0.0842704	0.491854	U3	_	_
ENSG00000252341	-3.7125	-2.41322	0.0842704	0.491854	Y_RNA	_	_
ENSG00000235253	-3.7125	-2.41322	0.0842704	0.491854	AC010240.2	K03231	_
ENSG00000113249	-3.7125	-2.41322	0.0842704	0.491854	HAVCR1	K09228	molecular_function:virus receptor activity(GO:0001618);cellular_component:integral component of membrane(GO:0016021);biological_process:modulation by virus of host morphology or physiology(GO:0019048)
ENSG00000262803	-3.7125	-2.41322	0.0842704	0.491854	RP11-160A9.3	_	_
ENSG00000225206	-3.65877	0.4933	1.02e-15	7.92e-14	MIR137HG	_	_
ENSG00000189056	-3.64699	-0.917095	8.52e-07	2.11e-05	RELN	K06249	biological_process:cell morphogenesis involved in differentiation(GO:0000904);biological_process:neuron migration(GO:0001764);molecular_function:protein serine/threonine/tyrosine kinase activity(GO:0004712);cellular_component:proteinaceous extracellular matrix(GO:0005578);cellular_component:extracellular space(GO:0005615);cellular_component:cytoplasm(GO:0005737);biological_process:proteolysis(GO:…
ENSG00000204644	-3.55933	-1.5021	0.00205825	0.0236992	ZFP57	K09228	biological_process:negative regulation of transcription from RNA polymerase II promoter(GO:0000122);molecular_function:DNA binding(GO:0003677);cellular_component:nuclear heterochromatin(GO:0005720);biological_process:regulation of gene expression by genetic imprinting(GO:0006349);biological_process:transcription, DNA-templated(GO:0006351);biological_process:peripheral nervous system development(G…
ENSG00000262888	-3.46854	-1.59412	0.000475438	0.00661229	RP11-462G12.2	_	_
ENSG00000121904	-3.46844	-2.50005	0.150346	0.739973	CSMD2	K17495	cellular_component:plasma membrane(GO:0005886);cellular_component:integral component of membrane(GO:0016021)
ENSG00000271546	-3.46844	-2.50005	0.150346	0.739973	RP4-725K1.1	_	_
ENSG00000169418	-3.46844	-2.50005	0.150346	0.739973	NPR1	K12323	molecular_function:nucleotide binding(GO:0000166);molecular_function:guanylate cyclase activity(GO:0004383);molecular_function:protein kinase activity(GO:0004672);molecular_function:ATP binding(GO:0005524);molecular_function:GTP binding(GO:0005525);cellular_component:integral component of plasma membrane(GO:0005887);biological_process:cGMP biosynthetic process(GO:0006182);biological_process:cell …
ENSG00000266684	-3.46844	-2.50005	0.150346	0.739973	AL117337.1	_	_
ENSG00000189052	-3.46844	-2.50005	0.150346	0.739973	CGB5	K10045	_
ENSG00000125888	-3.46844	-2.50005	0.150346	0.739973	BANF2	_	molecular_function:DNA binding(GO:0003677);cellular_component:nucleus(GO:0005634);cellular_component:nucleolus(GO:0005730);cellular_component:cytoplasm(GO:0005737)
ENSG00000252763	-3.46844	-2.50005	0.150346	0.739973	RNU2-31P	_	_
ENSG00000109610	-3.46844	-2.50005	0.150346	0.739973	SOD3	K16627	biological_process:response to hypoxia(GO:0001666);molecular_function:superoxide dismutase activity(GO:0004784);molecular_function:copper ion binding(GO:0005507);molecular_function:protein binding(GO:0005515);cellular_component:extracellular space(GO:0005615);cellular_component:nucleus(GO:0005634);cellular_component:cytoplasm(GO:0005737);cellular_component:mitochondrion(GO:0005739);cellular_compo…
ENSG00000264496	-3.46844	-2.50005	0.150346	0.739973	AC108218.1	_	_
ENSG00000113361	-3.46844	-2.50005	0.150346	0.739973	CDH6	K06798	molecular_function:calcium ion binding(GO:0005509);cellular_component:nucleus(GO:0005634);cellular_component:nucleolus(GO:0005730);cellular_component:cytoplasm(GO:0005737);cellular_component:plasma membrane(GO:0005886);biological_process:cell adhesion(GO:0007155);biological_process:homophilic cell adhesion via plasma membrane adhesion molecules(GO:0007156);cellular_component:integral component of…
ENSG00000112038	-3.46844	-2.50005	0.150346	0.739973	OPRM1	K04215	molecular_function:G-protein alpha-subunit binding(GO:0001965);molecular_function:G-protein coupled receptor activity(GO:0004930);molecular_function:beta-endorphin receptor activity(GO:0004979);molecular_function:voltage-gated calcium channel activity(GO:0005245);molecular_function:protein binding(GO:0005515);cellular_component:endoplasmic reticulum(GO:0005783);cellular_component:Golgi apparatus(…
ENSG00000233123	-3.46844	-2.50005	0.150346	0.739973	LINC01007	_	_
ENSG00000184258	-3.46844	-2.50005	0.150346	0.739973	CDR1	_	_
ENSG00000231398	-3.46403	-2.5001	0.150346	0.739973	RP11-375N9.2	_	_
ENSG00000206859	-3.46403	-2.5001	0.150346	0.739973	RNU6-767P	_	_
ENSG00000250859	-3.46403	-2.5001	0.150346	0.739973	HNRNPKP1	K12886	_
ENSG00000252612	-3.45962	-2.50014	0.150346	0.739973	Y_RNA	_	_
ENSG00000234170	-3.45962	-2.50014	0.150346	0.739973	RP11-446F3.2	_	_
ENSG00000227019	-3.45962	-2.50014	0.150346	0.739973	OR7E101P	K04257	_
ENSG00000259495	-3.45962	-2.50014	0.150346	0.739973	RP11-210M15.2	_	_
ENSG00000231802	-3.45962	-2.50014	0.150346	0.739973	AC009502.1	K09512	_
ENSG00000232398	-3.45962	-2.50014	0.150346	0.739973	TMPRSS11CP	K14359	_
ENSG00000169067	-3.45962	-2.50014	0.150346	0.739973	ACTBL2	K05692	molecular_function:ATP binding(GO:0005524);cellular_component:cytoplasm(GO:0005737);cellular_component:cytoskeleton(GO:0005856)
ENSG00000234449	-3.45962	-2.50014	0.150346	0.739973	RP11-706O15.3	_	_
ENSG00000182508	-3.45962	-2.50014	0.150346	0.739973	LHFPL1	_	cellular_component:integral component of membrane(GO:0016021)
ENSG00000049247	-3.45669	-2.50018	0.150346	0.739973	UTS2	K05248	biological_process:response to hypoxia(GO:0001666);biological_process:negative regulation of glomerular filtration(GO:0003105);molecular_function:receptor binding(GO:0005102);molecular_function:hormone activity(GO:0005179);cellular_component:extracellular region(GO:0005576);cellular_component:extracellular space(GO:0005615);biological_process:muscle contraction(GO:0006936);biological_process:posi…
ENSG00000228734	-3.45669	-2.50018	0.150346	0.739973	RP11-335E6.3	_	_
ENSG00000143851	-3.45669	-2.50018	0.150346	0.739973	PTPN7	K18019	molecular_function:protein tyrosine phosphatase activity(GO:0004725);cellular_component:cytoplasm(GO:0005737);cellular_component:cytosol(GO:0005829);cellular_component:cytoskeleton(GO:0005856);biological_process:protein dephosphorylation(GO:0006470);cellular_component:cytoplasmic side of plasma membrane(GO:0009898);biological_process:peptidyl-tyrosine dephosphorylation(GO:0035335)
ENSG00000203710	-3.45669	-2.50018	0.150346	0.739973	CR1	K04011	molecular_function:complement component C3b binding(GO:0001851);molecular_function:complement component C4b binding(GO:0001855);molecular_function:complement component C4b receptor activity(GO:0001861);molecular_function:complement component C3b receptor activity(GO:0004877);cellular_component:plasma membrane(GO:0005886);cellular_component:integral component of plasma membrane(GO:0005887);biologi…
ENSG00000207612	-3.45669	-2.50018	0.150346	0.739973	MIR604	_	_
ENSG00000273030	-3.45669	-2.50018	0.150346	0.739973	RP11-285F16.1	_	_
ENSG00000086205	-3.45669	-2.50018	0.150346	0.739973	FOLH1	K14592	molecular_function:carboxypeptidase activity(GO:0004180);cellular_component:nucleus(GO:0005634);cellular_component:cytoplasm(GO:0005737);cellular_component:integral component of plasma membrane(GO:0005887);biological_process:proteolysis(GO:0006508);biological_process:folic acid-containing compound metabolic process(GO:0006760);molecular_function:peptidase activity(GO:0008233);molecular_function:m…
ENSG00000166928	-3.45669	-2.50018	0.150346	0.739973	MS4A14	_	cellular_component:integral component of membrane(GO:0016021)
ENSG00000166961	-3.45669	-2.50018	0.150346	0.739973	MS4A15	_	cellular_component:integral component of membrane(GO:0016021)
ENSG00000256913	-3.45669	-2.50018	0.150346	0.739973	RP1-102E24.6	K12642	_
ENSG00000139144	-3.45669	-2.50018	0.150346	0.739973	PIK3C2G	K00923	molecular_function:ATP binding(GO:0005524);cellular_component:cytosol(GO:0005829);cellular_component:plasma membrane(GO:0005886);cellular_component:phosphatidylinositol 3-kinase complex(GO:0005942);biological_process:phospholipid metabolic process(GO:0006644);biological_process:phosphatidylinositol biosynthetic process(GO:0006661);biological_process:chemotaxis(GO:0006935);biological_process:biolo…
ENSG00000235472	-3.45669	-2.50018	0.150346	0.739973	EIF4A1P7	K03257	_
ENSG00000092054	-3.45669	-2.50018	0.150346	0.739973	MYH7	K17751	molecular_function:microfilament motor activity(GO:0000146);cellular_component:stress fiber(GO:0001725);biological_process:regulation of heart rate(GO:0002027);molecular_function:actin binding(GO:0003779);molecular_function:protein binding(GO:0005515);molecular_function:calmodulin binding(GO:0005516);molecular_function:ATP binding(GO:0005524);cellular_component:nucleus(GO:0005634);cellular_compon…
ENSG00000140067	-3.45669	-2.50018	0.150346	0.739973	FAM181A	_	_
ENSG00000168398	-3.45669	-2.50018	0.150346	0.739973	BDKRB2	K03916	molecular_function:protease binding(GO:0002020);molecular_function:phosphatidylinositol phospholipase C activity(GO:0004435);molecular_function:bradykinin receptor activity(GO:0004947);molecular_function:protein binding(GO:0005515);cellular_component:endosome(GO:0005768);cellular_component:plasma membrane(GO:0005886);cellular_component:integral component of plasma membrane(GO:0005887);biological_…
ENSG00000259481	-3.45669	-2.50018	0.150346	0.739973	RP11-39M21.1	_	_
ENSG00000078328	-3.45669	-2.50018	0.150346	0.739973	RBFOX1	K14946	molecular_function:nucleotide binding(GO:0000166);molecular_function:nucleic acid binding(GO:0003676);molecular_function:RNA binding(GO:0003723);molecular_function:protein binding(GO:0005515);cellular_component:nucleus(GO:0005634);cellular_component:cytoplasm(GO:0005737);cellular_component:trans-Golgi network(GO:0005802);biological_process:mRNA processing(GO:0006397);molecular_function:protein C-…
ENSG00000212206	-3.45669	-2.50018	0.150346	0.739973	SNORA69	_	_
ENSG00000206432	-3.45669	-2.50018	0.150346	0.739973	TMEM200C	_	cellular_component:integral component of membrane(GO:0016021)
ENSG00000197705	-3.45669	-2.50018	0.150346	0.739973	KLHL14	K10451	cellular_component:endoplasmic reticulum(GO:0005783);cellular_component:endoplasmic reticulum membrane(GO:0005789);cellular_component:cytosol(GO:0005829);cellular_component:neuron projection(GO:0043005);cellular_component:neuronal cell body(GO:0043025)
ENSG00000105278	-3.45669	-2.50018	0.150346	0.739973	ZFR2	_	molecular_function:nucleic acid binding(GO:0003676);molecular_function:zinc ion binding(GO:0008270)
ENSG00000144035	-3.45669	-2.50018	0.150346	0.739973	NAT8	_	biological_process:gastrulation with mouth forming second(GO:0001702);molecular_function:N-acetyltransferase activity(GO:0008080);cellular_component:integral component of membrane(GO:0016021);biological_process:response to drug(GO:0042493)
ENSG00000242515	-3.45669	-2.50018	0.150346	0.739973	UGT1A10	K00699	molecular_function:retinoic acid binding(GO:0001972);molecular_function:protein kinase C binding(GO:0005080);cellular_component:endoplasmic reticulum(GO:0005783);cellular_component:endoplasmic reticulum membrane(GO:0005789);biological_process:metabolic process(GO:0008152);molecular_function:glucuronosyltransferase activity(GO:0015020);cellular_component:integral component of membrane(GO:0016021);…
ENSG00000145242	-3.45669	-2.50018	0.150346	0.739973	EPHA5	K05106	molecular_function:ephrin receptor activity(GO:0005003);molecular_function:GPI-linked ephrin receptor activity(GO:0005004);molecular_function:transmembrane-ephrin receptor activity(GO:0005005);molecular_function:ATP binding(GO:0005524);cellular_component:rough endoplasmic reticulum(GO:0005791);cellular_component:plasma membrane(GO:0005886);cellular_component:integral component of plasma membrane(…
ENSG00000035720	-3.45669	-2.50018	0.150346	0.739973	STAP1	_	molecular_function:SH3/SH2 adaptor activity(GO:0005070);molecular_function:protein binding(GO:0005515);molecular_function:phospholipid binding(GO:0005543);cellular_component:nucleus(GO:0005634);cellular_component:nucleolus(GO:0005730);cellular_component:cytoplasm(GO:0005737);cellular_component:mitochondrion(GO:0005739);biological_process:intracellular protein transport(GO:0006886);;biological_pro…
ENSG00000204969	-3.45669	-2.50018	0.150346	0.739973	PCDHA2	K16493	molecular_function:calcium ion binding(GO:0005509);cellular_component:integral component of plasma membrane(GO:0005887);biological_process:cell adhesion(GO:0007155);biological_process:homophilic cell adhesion via plasma membrane adhesion molecules(GO:0007156);biological_process:nervous system development(GO:0007399)
ENSG00000022355	-3.45669	-2.50018	0.150346	0.739973	GABRA1	K05175	molecular_function:GABA-A receptor activity(GO:0004890);molecular_function:extracellular ligand-gated ion channel activity(GO:0005230);molecular_function:chloride channel activity(GO:0005254);cellular_component:plasma membrane(GO:0005886);cellular_component:integral component of plasma membrane(GO:0005887);biological_process:transport(GO:0006810);biological_process:gamma-aminobutyric acid signali…
ENSG00000227945	-3.45669	-2.50018	0.150346	0.739973	RP11-103C16.2	_	_
ENSG00000164694	-3.45669	-2.50018	0.150346	0.739973	FNDC1	_	biological_process:positive regulation of protein phosphorylation(GO:0001934);cellular_component:extracellular region(GO:0005576);cellular_component:plasma membrane(GO:0005886);cellular_component:cell-cell junction(GO:0005911);biological_process:positive regulation of cardiac muscle cell apoptotic process(GO:0010666);cellular_component:mitochondrial membrane(GO:0031966);biological_process:regulat…
ENSG00000229211	-3.45669	-2.50018	0.150346	0.739973	RP11-363L24.2	_	_
ENSG00000137033	-3.45669	-2.50018	0.150346	0.739973	IL33	K12967	biological_process:negative regulation of leukocyte migration(GO:0002686);biological_process:negative regulation of T-helper 1 type immune response(GO:0002826);biological_process:positive regulation of type 2 immune response(GO:0002830);molecular_function:cytokine activity(GO:0005125);molecular_function:protein binding(GO:0005515);cellular_component:extracellular space(GO:0005615);cellular_compon…
ENSG00000101825	-3.45669	-2.50018	0.150346	0.739973	MXRA5	_	cellular_component:extracellular region(GO:0005576)
ENSG00000076716	-3.45669	-2.50018	0.150346	0.739973	GPC4	K08110	biological_process:retinoid metabolic process(GO:0001523);cellular_component:proteinaceous extracellular matrix(GO:0005578);cellular_component:extracellular space(GO:0005615);cellular_component:Golgi lumen(GO:0005796);cellular_component:plasma membrane(GO:0005886);cellular_component:integral component of plasma membrane(GO:0005887);biological_process:carbohydrate metabolic process(GO:0005975);bio…
ENSG00000226835	-3.45523	-2.50019	0.150346	0.739973	RP11-148B18.3	_	_
ENSG00000225980	-3.45523	-2.50019	0.150346	0.739973	OR7E19P	K04257	_
ENSG00000212497	-3.45523	-2.50019	0.150346	0.739973	RNA5SP465	_	_
ENSG00000109667	-3.45523	-2.50019	0.150346	0.739973	SLC2A9	K08146	molecular_function:sugar:proton symporter activity(GO:0005351);molecular_function:glucose transmembrane transporter activity(GO:0005355);cellular_component:nuclear envelope(GO:0005635);cellular_component:plasma membrane(GO:0005886);cellular_component:integral component of plasma membrane(GO:0005887);biological_process:glucose transport(GO:0015758);cellular_component:integral component of membrane…
ENSG00000218980	-3.45523	-2.50019	0.150346	0.739973	FTH1P15	K00522	_
ENSG00000254316	-3.45523	-2.50019	0.150346	0.739973	CTD-2345M20.2	_	_
ENSG00000242569	-3.45104	-2.50023	0.144483	0.739973	RP11-435B5.3	_	_
ENSG00000236937	-3.45104	-2.50023	0.144474	0.739973	PTGES3P4	K15730	_
ENSG00000213260	-3.45104	-2.50023	0.144474	0.739973	YWHAZP5	K16197	_
ENSG00000133328	-3.45104	-2.50023	0.144463	0.739973	HRASLS2	K16817	cellular_component:cytoplasm(GO:0005737);cellular_component:integral component of membrane(GO:0016021);biological_process:lipid catabolic process(GO:0016042);molecular_function:transferase activity, transferring acyl groups(GO:0016746);molecular_function:hydrolase activity(GO:0016787)
ENSG00000187510	-3.45104	-2.50023	0.144455	0.739973	PLEKHG7	_	molecular_function:Rho guanyl-nucleotide exchange factor activity(GO:0005089);molecular_function:phospholipid binding(GO:0005543);biological_process:regulation of Rho protein signal transduction(GO:0035023)
ENSG00000140044	-3.45103	-2.50023	0.144444	0.739973	JDP2	K09033	biological_process:negative regulation of transcription from RNA polymerase II promoter(GO:0000122);molecular_function:chromatin binding(GO:0003682);molecular_function:double-stranded DNA binding(GO:0003690);molecular_function:sequence-specific DNA binding transcription factor activity(GO:0003700);cellular_component:nucleus(GO:0005634);biological_process:transcription, DNA-templated(GO:0006351);b…
ENSG00000125851	-3.45103	-2.50023	0.144433	0.739973	PCSK2	K01360	molecular_function:serine-type endopeptidase activity(GO:0004252);molecular_function:protein binding(GO:0005515);cellular_component:extracellular space(GO:0005615);biological_process:proteolysis(GO:0006508);biological_process:nervous system development(GO:0007399);biological_process:embryo development(GO:0009790);cellular_component:membrane(GO:0016020);biological_process:protein autoprocessing(GO…
ENSG00000267787	-3.45103	-2.50023	0.144426	0.739973	RP11-35G9.5	_	_
ENSG00000160224	-3.45103	-2.50023	0.144415	0.739973	AIRE	K10603	molecular_function:chromatin binding(GO:0003682);molecular_function:protein binding(GO:0005515);cellular_component:nucleus(GO:0005634);cellular_component:nucleolus(GO:0005730);cellular_component:cytoplasm(GO:0005737);cellular_component:plasma membrane(GO:0005886);biological_process:transcription, DNA-templated(GO:0006351);biological_process:regulation of transcription, DNA-templated(GO:0006355);b…
ENSG00000241481	-3.45103	-2.50023	0.144408	0.739973	AC159540.2	_	_
ENSG00000172478	-3.45103	-2.50023	0.144408	0.739973	C2orf54	_	_
ENSG00000231574	-3.45102	-2.50023	0.144401	0.739973	RP11-91K9.1	_	_
ENSG00000171864	-3.45102	-2.50023	0.144398	0.739973	PRND	K17985	molecular_function:copper ion binding(GO:0005507);cellular_component:plasma membrane(GO:0005886);biological_process:cellular copper ion homeostasis(GO:0006878);cellular_component:anchored component of membrane(GO:0031225);biological_process:protein homooligomerization(GO:0051260)
ENSG00000178597	-3.45102	-2.50023	0.144384	0.739973	PSAPL1	K12382	cellular_component:extracellular region(GO:0005576);cellular_component:lysosome(GO:0005764);biological_process:sphingolipid metabolic process(GO:0006665)
ENSG00000163106	-3.45102	-2.50023	0.144375	0.739973	HPGDS	K01830	molecular_function:magnesium ion binding(GO:0000287);molecular_function:glutathione transferase activity(GO:0004364);molecular_function:prostaglandin-D synthase activity(GO:0004667);molecular_function:calcium ion binding(GO:0005509);cellular_component:nucleus(GO:0005634);cellular_component:nucleolus(GO:0005730);cellular_component:cytoplasm(GO:0005737);cellular_component:cytosol(GO:0005829);biolog…
ENSG00000122145	-3.45102	-2.50023	0.144368	0.739973	TBX22	K10186	biological_process:negative regulation of transcription from RNA polymerase II promoter(GO:0000122);molecular_function:DNA binding(GO:0003677);molecular_function:sequence-specific DNA binding transcription factor activity(GO:0003700);cellular_component:nucleus(GO:0005634);biological_process:transcription, DNA-templated(GO:0006351);biological_process:regulation of transcription, DNA-templated(GO:0…
ENSG00000273363	-3.45084	-2.50024	0.150346	0.739973	RP11-285G1.14	_	_
ENSG00000222371	-3.45084	-2.50024	0.150346	0.739973	RN7SKP202	_	_
ENSG00000200274	-3.45084	-2.50024	0.150346	0.739973	RNU4-32P	_	_
ENSG00000259437	-3.45084	-2.50024	0.150346	0.739973	RP11-798K3.4	_	_
ENSG00000260851	-3.45084	-2.50024	0.150346	0.739973	RP11-403P17.5	K00857	_
ENSG00000262870	-3.45084	-2.50024	0.150346	0.739973	CYCSP40	_	_
ENSG00000237978	-3.45084	-2.50024	0.150346	0.739973	RP11-385J1.2	_	_
ENSG00000102128	-3.45084	-2.50024	0.150346	0.739973	RAB40AL	K07928	molecular_function:GTP binding(GO:0005525);cellular_component:cytoplasm(GO:0005737);cellular_component:mitochondrion(GO:0005739);cellular_component:plasma membrane(GO:0005886);biological_process:small GTPase mediated signal transduction(GO:0007264);biological_process:protein transport(GO:0015031);biological_process:protein ubiquitination(GO:0016567)
ENSG00000266129	-3.44744	-2.50027	0.143607	0.73828	SRP68P1	K03107	_
ENSG00000232124	-3.44744	-2.50027	0.143589	0.73828	AP001057.1	_	_
ENSG00000137872	-3.44744	-2.50027	0.143588	0.73828	SEMA6D	K06842	molecular_function:receptor activity(GO:0004872);cellular_component:Golgi apparatus(GO:0005794);cellular_component:plasma membrane(GO:0005886);biological_process:multicellular organismal development(GO:0007275);biological_process:axon guidance(GO:0007411);cellular_component:integral component of membrane(GO:0016021);molecular_function:semaphorin receptor binding(GO:0030215)
ENSG00000261528	-3.44744	-2.50027	0.143588	0.73828	AC002400.1	K18468	_
ENSG00000233834	-3.44744	-2.50027	0.143574	0.73828	AC005083.1	_	_
ENSG00000224549	-3.44744	-2.50027	0.14357	0.73828	RP11-370B11.3	_	_
ENSG00000162571	-3.445	-2.50031	0.150346	0.739973	TTLL10	_	cellular_component:cytoplasm(GO:0005737);cellular_component:plasma membrane(GO:0005886);biological_process:protein polyglycylation(GO:0018094);cellular_component:nuclear membrane(GO:0031965);molecular_function:protein-glycine ligase activity(GO:0070735)
ENSG00000203589	-3.445	-2.50031	0.150346	0.739973	RP5-886K2.1	K17985	_
ENSG00000174348	-3.445	-2.50031	0.150346	0.739973	PODN	_	molecular_function:collagen binding(GO:0005518);cellular_component:proteinaceous extracellular matrix(GO:0005578);cellular_component:extracellular space(GO:0005615);cellular_component:cytoplasm(GO:0005737);biological_process:negative regulation of cell proliferation(GO:0008285);biological_process:negative regulation of cell migration(GO:0030336)
ENSG00000021852	-3.445	-2.50031	0.150346	0.739973	C8B	K03998	cellular_component:extracellular region(GO:0005576);cellular_component:membrane attack complex(GO:0005579);cellular_component:extracellular space(GO:0005615);biological_process:immune response(GO:0006955);biological_process:complement activation(GO:0006956);biological_process:complement activation, alternative pathway(GO:0006957);biological_process:complement activation, classical pathway(GO:0006…
ENSG00000180869	-3.445	-2.50031	0.150346	0.739973	C1orf180	_	_
ENSG00000237756	-3.445	-2.50031	0.150346	0.739973	RP11-77M5.1	_	_
ENSG00000225112	-3.445	-2.50031	0.150346	0.739973	RP11-295P9.6	_	_
ENSG00000148702	-3.445	-2.50031	0.150346	0.739973	HABP2	K08648	molecular_function:serine-type endopeptidase activity(GO:0004252);molecular_function:glycosaminoglycan binding(GO:0005539);cellular_component:extracellular region(GO:0005576);cellular_component:extracellular space(GO:0005615);biological_process:proteolysis(GO:0006508);biological_process:cell adhesion(GO:0007155)
ENSG00000187908	-3.445	-2.50031	0.150346	0.739973	DMBT1	K13912	biological_process:inner cell mass cell proliferation(GO:0001833);biological_process:pattern recognition receptor signaling pathway(GO:0002221);molecular_function:scavenger receptor activity(GO:0005044);molecular_function:protein binding(GO:0005515);cellular_component:extracellular region(GO:0005576);cellular_component:proteinaceous extracellular matrix(GO:0005578);cellular_component:cytoplasm(GO…
ENSG00000171811	-3.445	-2.50031	0.150346	0.739973	TTC40	_	_
ENSG00000006071	-3.445	-2.50031	0.150346	0.739973	ABCC8	K05032	molecular_function:ATP binding(GO:0005524);cellular_component:plasma membrane(GO:0005886);biological_process:carbohydrate metabolic process(GO:0005975);biological_process:energy reserve metabolic process(GO:0006112);biological_process:potassium ion transport(GO:0006813);biological_process:synaptic transmission(GO:0007268);cellular_component:voltage-gated potassium channel complex(GO:0008076);mole…
ENSG00000111241	-3.445	-2.50031	0.150346	0.739973	FGF6	K04358	biological_process:cartilage condensation(GO:0001502);biological_process:angiogenesis(GO:0001525);cellular_component:extracellular region(GO:0005576);cellular_component:extracellular space(GO:0005615);biological_process:signal transduction(GO:0007165);biological_process:epidermal growth factor receptor signaling pathway(GO:0007173);biological_process:cell-cell signaling(GO:0007267);molecular_func…
ENSG00000224640	-3.445	-2.50031	0.150346	0.739973	SRSF1P1	K12890	_
ENSG00000196832	-3.445	-2.50031	0.150346	0.739973	OR11G2	K04257	molecular_function:G-protein coupled receptor activity(GO:0004930);molecular_function:olfactory receptor activity(GO:0004984);cellular_component:plasma membrane(GO:0005886);cellular_component:integral component of membrane(GO:0016021)
ENSG00000139865	-3.445	-2.50031	0.150346	0.739973	TTC6	_	_
ENSG00000065320	-3.445	-2.50031	0.150346	0.739973	NTN1	K06843	biological_process:neuron migration(GO:0001764);molecular_function:protein binding(GO:0005515);cellular_component:extracellular region(GO:0005576);cellular_component:basement membrane(GO:0005604);cellular_component:cytoplasm(GO:0005737);biological_process:apoptotic process(GO:0006915);biological_process:axon guidance(GO:0007411);biological_process:positive regulation of cell proliferation(GO:0008…
ENSG00000188803	-3.445	-2.50031	0.150346	0.739973	SHISA6	_	cellular_component:alpha-amino-3-hydroxy-5-methyl-4-isoxazolepropionic acid selective glutamate receptor complex(GO:0032281)
ENSG00000265474	-3.445	-2.50031	0.150346	0.739973	AC010761.9	_	_
ENSG00000175065	-3.445	-2.50031	0.150346	0.739973	DSG4	K07599	molecular_function:calcium ion binding(GO:0005509);cellular_component:plasma membrane(GO:0005886);biological_process:homophilic cell adhesion via plasma membrane adhesion molecules(GO:0007156);cellular_component:integral component of membrane(GO:0016021);cellular_component:desmosome(GO:0030057);biological_process:keratinocyte differentiation(GO:0030216);biological_process:BMP signaling pathway(GO…
ENSG00000141431	-3.445	-2.50031	0.150346	0.739973	ASXL3	K11471	molecular_function:DNA binding(GO:0003677);cellular_component:nucleus(GO:0005634);biological_process:transcription, DNA-templated(GO:0006351);biological_process:regulation of transcription, DNA-templated(GO:0006355);molecular_function:metal ion binding(GO:0046872)
ENSG00000105492	-3.445	-2.50031	0.150346	0.739973	SIGLEC6	K06738	cellular_component:extracellular region(GO:0005576);cellular_component:integral component of plasma membrane(GO:0005887);biological_process:cell adhesion(GO:0007155);biological_process:cell-cell signaling(GO:0007267);cellular_component:membrane(GO:0016020)
ENSG00000196872	-3.445	-2.50031	0.150346	0.739973	KIAA1211L	_	_
ENSG00000180251	-3.445	-2.50031	0.150346	0.739973	SLC9A4	K13961	cellular_component:plasma membrane(GO:0005886);biological_process:ion transport(GO:0006811);biological_process:regulation of pH(GO:0006885);molecular_function:sodium:proton antiporter activity(GO:0015385);cellular_component:integral component of membrane(GO:0016021);cellular_component:basolateral plasma membrane(GO:0016323);cellular_component:apical plasma membrane(GO:0016324);biological_process:…
ENSG00000144285	-3.445	-2.50031	0.150346	0.739973	SCN1A	K04833	cellular_component:voltage-gated sodium channel complex(GO:0001518);molecular_function:voltage-gated sodium channel activity(GO:0005248);biological_process:sodium ion transport(GO:0006814);biological_process:adult walking behavior(GO:0007628);cellular_component:intercalated disc(GO:0014704);cellular_component:integral component of membrane(GO:0016021);biological_process:neuronal action potential …
ENSG00000144407	-3.445	-2.50031	0.150346	0.739973	PTH2R	_	molecular_function:G-protein coupled receptor activity(GO:0004930);molecular_function:parathyroid hormone receptor activity(GO:0004991);cellular_component:plasma membrane(GO:0005886);cellular_component:integral component of plasma membrane(GO:0005887);biological_process:G-protein coupled receptor signaling pathway(GO:0007186);cellular_component:membrane(GO:0016020)
ENSG00000125788	-3.445	-2.50031	0.150346	0.739973	DEFB126	_	cellular_component:extracellular region(GO:0005576);cellular_component:cell surface(GO:0009986);cellular_component:glycocalyx(GO:0030112);biological_process:defense response to bacterium(GO:0042742)
ENSG00000101336	-3.445	-2.50031	0.150346	0.739973	HCK	K08893	biological_process:leukocyte migration involved in immune response(GO:0002522);biological_process:innate immune response-activating signal transduction(GO:0002758);molecular_function:protein tyrosine kinase activity(GO:0004713);molecular_function:non-membrane spanning protein tyrosine kinase activity(GO:0004715);molecular_function:protein binding(GO:0005515);molecular_function:ATP binding(GO:0005…
ENSG00000202150	-3.445	-2.50031	0.150346	0.739973	RNU6-407P	_	_
ENSG00000202071	-3.445	-2.50031	0.150346	0.739973	Y_RNA	_	_
ENSG00000082684	-3.445	-2.50031	0.150346	0.739973	SEMA5B	K06841	molecular_function:receptor activity(GO:0004872);biological_process:multicellular organismal development(GO:0007275);biological_process:nervous system development(GO:0007399);cellular_component:integral component of membrane(GO:0016021);biological_process:cell differentiation(GO:0030154)
ENSG00000121871	-3.445	-2.50031	0.150346	0.739973	SLITRK3	_	biological_process:axonogenesis(GO:0007409);cellular_component:integral component of membrane(GO:0016021)
ENSG00000145192	-3.445	-2.50031	0.150346	0.739973	AHSG	_	biological_process:skeletal system development(GO:0001501);biological_process:ossification(GO:0001503);molecular_function:cysteine-type endopeptidase inhibitor activity(GO:0004869);cellular_component:extracellular region(GO:0005576);cellular_component:extracellular space(GO:0005615);biological_process:pinocytosis(GO:0006907);biological_process:acute-phase response(GO:0006953);molecular_function:k…
ENSG00000152969	-3.445	-2.50031	0.150346	0.739973	JAKMIP1	_	molecular_function:RNA binding(GO:0003723);cellular_component:cytoplasm(GO:0005737);cellular_component:microtubule(GO:0005874);molecular_function:microtubule binding(GO:0008017);biological_process:protein transport(GO:0015031);molecular_function:kinesin binding(GO:0019894);cellular_component:extrinsic component of membrane(GO:0019898);molecular_function:kinase binding(GO:0019900);cellular_compone…
ENSG00000174145	-3.445	-2.50031	0.150346	0.739973	KIAA1239	_	_
ENSG00000164089	-3.445	-2.50031	0.150346	0.739973	ETNPPL	K14286	cellular_component:cellular_component(GO:0005575);cellular_component:mitochondrion(GO:0005739);biological_process:cellular amino acid metabolic process(GO:0006520);molecular_function:alanine-glyoxylate transaminase activity(GO:0008453);molecular_function:transaminase activity(GO:0008483);molecular_function:pyridoxal phosphate binding(GO:0030170);molecular_function:ethanolamine-phosphate phospho-l…
ENSG00000197083	-3.445	-2.50031	0.150346	0.739973	ZNF300P1	K09228	molecular_function:nucleic acid binding(GO:0003676);cellular_component:intracellular(GO:0005622);biological_process:regulation of transcription, DNA-templated(GO:0006355)
ENSG00000146151	-3.445	-2.50031	0.150346	0.739973	HMGCLL1	K01640	molecular_function:hydroxymethylglutaryl-CoA lyase activity(GO:0004419);cellular_component:endoplasmic reticulum(GO:0005783);cellular_component:endoplasmic reticulum membrane(GO:0005789);cellular_component:cytosol(GO:0005829);cellular_component:membrane(GO:0016020);molecular_function:metal ion binding(GO:0046872);biological_process:ketone body biosynthetic process(GO:0046951);cellular_component:p…
ENSG00000185811	-3.445	-2.50031	0.150346	0.739973	IKZF1	K09220	biological_process:negative regulation of transcription from RNA polymerase II promoter(GO:0000122);biological_process:natural killer cell differentiation(GO:0001779);molecular_function:DNA binding(GO:0003677);molecular_function:sequence-specific DNA binding transcription factor activity(GO:0003700);cellular_component:nucleus(GO:0005634);cellular_component:pericentric heterochromatin(GO:0005721);…
ENSG00000226965	-3.445	-2.50031	0.150346	0.739973	AC003088.1	_	_
ENSG00000078579	-3.445	-2.50031	0.150346	0.739973	FGF20	K04358	molecular_function:fibroblast growth factor receptor binding(GO:0005104);cellular_component:extracellular region(GO:0005576);biological_process:signal transduction(GO:0007165);biological_process:epidermal growth factor receptor signaling pathway(GO:0007173);biological_process:cell-cell signaling(GO:0007267);molecular_function:growth factor activity(GO:0008083);biological_process:positive regulati…
ENSG00000253789	-3.445	-2.50031	0.150346	0.739973	CTD-2571E19.1	_	_
ENSG00000083307	-3.445	-2.50031	0.150346	0.739973	GRHL2	K09275	biological_process:in utero embryonic development(GO:0001701);biological_process:neural tube closure(GO:0001843);molecular_function:DNA binding(GO:0003677);cellular_component:nucleus(GO:0005634);cellular_component:nucleolus(GO:0005730);cellular_component:cytoplasm(GO:0005737);biological_process:transcription, DNA-templated(GO:0006351);biological_process:regulation of transcription, DNA-templated(…
ENSG00000165023	-3.445	-2.50031	0.150346	0.739973	DIRAS2	K07841	molecular_function:GTPase activity(GO:0003924);molecular_function:GTP binding(GO:0005525);cellular_component:plasma membrane(GO:0005886);biological_process:small GTPase mediated signal transduction(GO:0007264)
ENSG00000101916	-3.445	-2.50031	0.150346	0.739973	TLR8	K10170	cellular_component:Golgi membrane(GO:0000139);biological_process:toll-like receptor signaling pathway(GO:0002224);biological_process:MyD88-dependent toll-like receptor signaling pathway(GO:0002755);molecular_function:DNA binding(GO:0003677);molecular_function:RNA binding(GO:0003723);molecular_function:double-stranded RNA binding(GO:0003725);molecular_function:single-stranded RNA binding(GO:000372…
ENSG00000175718	-3.445	-2.50031	0.150346	0.739973	RBMXL3	K12885	molecular_function:nucleotide binding(GO:0000166);molecular_function:RNA binding(GO:0003723)
ENSG00000258425	-3.44354	-2.50032	0.150346	0.739973	CTD-2207P18.1	_	_
ENSG00000105696	-3.44354	-2.50032	0.150346	0.739973	TMEM59L	_	cellular_component:Golgi membrane(GO:0000139);cellular_component:membrane(GO:0016020);cellular_component:integral component of membrane(GO:0016021)
ENSG00000228386	-3.44354	-2.50032	0.150346	0.739973	RP5-1125A11.4	_	_
ENSG00000236794	-3.44354	-2.50032	0.150346	0.739973	BCRP8	K08878	_
ENSG00000221264	-3.44354	-2.50032	0.150346	0.739973	MIR1284	_	_
ENSG00000250934	-3.44354	-2.50032	0.150346	0.739973	RP11-71E19.1	_	_
ENSG00000213761	-3.44354	-2.50032	0.150346	0.739973	MT1P1	K14739	_
ENSG00000095110	-3.44203	-2.50035	0.141986	0.733071	NXPE1	_	cellular_component:extracellular region(GO:0005576)
ENSG00000077498	-3.44203	-2.50035	0.14199	0.733071	TYR	K00505	molecular_function:monophenol monooxygenase activity(GO:0004503);molecular_function:copper ion binding(GO:0005507);molecular_function:protein binding(GO:0005515);cellular_component:cytoplasm(GO:0005737);cellular_component:lysosome(GO:0005764);cellular_component:Golgi-associated vesicle(GO:0005798);biological_process:melanin biosynthetic process from tyrosine(GO:0006583);biological_process:eye pig…
ENSG00000251139	-3.44203	-2.50035	0.141996	0.733071	RP11-701P16.2	_	_
ENSG00000152092	-3.44203	-2.50035	0.141998	0.733071	ASTN1	_	biological_process:neuron migration(GO:0001764);cellular_component:cellular_component(GO:0005575);cellular_component:endosome(GO:0005768);biological_process:neuron cell-cell adhesion(GO:0007158);biological_process:locomotory behavior(GO:0007626);cellular_component:external side of plasma membrane(GO:0009897);cellular_component:integral component of membrane(GO:0016021);biological_process:cell mig…
ENSG00000255670	-3.44203	-2.50035	0.142002	0.733071	RP11-253I19.3	_	_
ENSG00000090534	-3.44203	-2.50035	0.142002	0.733071	THPO	K06854	molecular_function:cytokine activity(GO:0005125);molecular_function:hormone activity(GO:0005179);cellular_component:extracellular region(GO:0005576);cellular_component:extracellular space(GO:0005615);biological_process:multicellular organismal development(GO:0007275);biological_process:blood coagulation(GO:0007596);molecular_function:growth factor activity(GO:0008083);biological_process:cell prol…
ENSG00000226087	-3.44203	-2.50035	0.142004	0.733071	AC106869.2	_	_
ENSG00000212385	-3.44203	-2.50035	0.142005	0.733071	RNU6-817P	_	_
ENSG00000201862	-3.44203	-2.50035	0.142008	0.733071	Y_RNA	_	_
ENSG00000113303	-3.44203	-2.50035	0.14201	0.733071	BTNL8	K06712	molecular_function:protein binding(GO:0005515);cellular_component:integral component of membrane(GO:0016021)
ENSG00000104112	-3.44203	-2.50035	0.142013	0.733071	SCG3	_	biological_process:platelet degranulation(GO:0002576);cellular_component:extracellular region(GO:0005576);biological_process:blood coagulation(GO:0007596);biological_process:platelet activation(GO:0030168);cellular_component:transport vesicle membrane(GO:0030658);cellular_component:secretory granule lumen(GO:0034774)
ENSG00000183747	-3.44203	-2.50035	0.142014	0.733071	ACSM2A	K01896	molecular_function:catalytic activity(GO:0003824);molecular_function:ATP binding(GO:0005524);cellular_component:mitochondrion(GO:0005739);cellular_component:mitochondrial matrix(GO:0005759);biological_process:fatty acid metabolic process(GO:0006631);biological_process:medium-chain fatty-acyl-CoA metabolic process(GO:0036112);biological_process:glucose homeostasis(GO:0042593);molecular_function:me…
ENSG00000172554	-3.44203	-2.50035	0.142017	0.733071	SNTG2	_	molecular_function:actin binding(GO:0003779);molecular_function:phospholipid binding(GO:0005543);cellular_component:cytoplasm(GO:0005737);cellular_component:cytoskeleton(GO:0005856);biological_process:central nervous system development(GO:0007417);cellular_component:syntrophin complex(GO:0016013);molecular_function:PDZ domain binding(GO:0030165);cellular_component:sarcolemma(GO:0042383)
ENSG00000106341	-3.44203	-2.50035	0.142018	0.733071	PPP1R17	K08067	molecular_function:protein phosphatase inhibitor activity(GO:0004864);molecular_function:protein serine/threonine phosphatase inhibitor activity(GO:0004865);cellular_component:cellular_component(GO:0005575);biological_process:protein phosphorylation(GO:0006468);biological_process:signal transduction(GO:0007165);;biological_process:central nervous system development(GO:0007417);biological_process:…
ENSG00000165084	-3.44203	-2.50035	0.142021	0.733071	C8orf34	_	biological_process:signal transduction(GO:0007165);molecular_function:cAMP-dependent protein kinase regulator activity(GO:0008603)
ENSG00000217512	-3.44203	-2.50035	0.142022	0.733071	RP11-477E3.2	K14312	_
ENSG00000263388	-3.44202	-2.50035	0.142025	0.733071	CTC-297N7.10	_	_
ENSG00000248159	-3.44202	-2.50035	0.142025	0.733071	HSPA8P11	K03283	_
ENSG00000252677	-3.44202	-2.50035	0.14203	0.733071	SNORA81	_	_
ENSG00000231978	-3.43626	-2.5004	0.150346	0.739973	RP11-132G19.3	_	_
ENSG00000066185	-3.43626	-2.5004	0.150346	0.739973	ZMYND12	_	cellular_component:intracellular(GO:0005622);molecular_function:metal ion binding(GO:0046872)
ENSG00000225928	-3.43626	-2.5004	0.150346	0.739973	CACYBPP1	K04507	_
ENSG00000238995	-3.43626	-2.5004	0.150346	0.739973	snoU13	_	_
ENSG00000258134	-3.43626	-2.5004	0.150346	0.739973	RP11-956A19.1	_	_
ENSG00000241631	-3.43626	-2.5004	0.150346	0.739973	RN7SL316P	_	_
ENSG00000270876	-3.43626	-2.5004	0.150346	0.739973	CTC-523E23.8	_	_
ENSG00000163599	-3.43626	-2.5004	0.150346	0.739973	CTLA4	K06538	molecular_function:protein binding(GO:0005515);cellular_component:Golgi apparatus(GO:0005794);cellular_component:plasma membrane(GO:0005886);cellular_component:integral component of plasma membrane(GO:0005887);biological_process:immune response(GO:0006955);biological_process:cellular response to DNA damage stimulus(GO:0006974);cellular_component:external side of plasma membrane(GO:0009897);biolog…
ENSG00000261757	-3.43626	-2.5004	0.150346	0.739973	AC005592.3	_	_
ENSG00000106178	-3.43626	-2.5004	0.150346	0.739973	CCL24	K05514	biological_process:positive regulation of endothelial cell proliferation(GO:0001938);cellular_component:extracellular space(GO:0005615);biological_process:chemotaxis(GO:0006935);biological_process:inflammatory response(GO:0006954);biological_process:immune response(GO:0006955);biological_process:cytoskeleton organization(GO:0007010);biological_process:signal transduction(GO:0007165);biological_pr…
ENSG00000104313	-3.43626	-2.5004	0.150346	0.739973	EYA1	K15616	biological_process:establishment of mitotic spindle orientation(GO:0000132);biological_process:metanephros development(GO:0001656);biological_process:branching involved in ureteric bud morphogenesis(GO:0001658);biological_process:outflow tract morphogenesis(GO:0003151);molecular_function:protein tyrosine phosphatase activity(GO:0004725);molecular_function:protein binding(GO:0005515);cellular_comp…
ENSG00000142609	-3.43335	-2.50043	0.150346	0.739973	C1orf222	_	_
ENSG00000175206	-3.43335	-2.50043	0.150346	0.739973	NPPA	K12334	molecular_function:receptor binding(GO:0005102);molecular_function:hormone activity(GO:0005179);cellular_component:extracellular region(GO:0005576);cellular_component:extracellular space(GO:0005615);cellular_component:nucleus(GO:0005634);biological_process:cGMP biosynthetic process(GO:0006182);biological_process:transcription initiation from RNA polymerase II promoter(GO:0006367);biological_proce…
ENSG00000186118	-3.43335	-2.50043	0.150346	0.739973	TEX38	_	cellular_component:integral component of membrane(GO:0016021)
ENSG00000066294	-3.43335	-2.50043	0.150346	0.739973	CD84	K06511	molecular_function:receptor activity(GO:0004872);cellular_component:plasma membrane(GO:0005886);cellular_component:integral component of plasma membrane(GO:0005887);biological_process:defense response(GO:0006952);biological_process:homophilic cell adhesion via plasma membrane adhesion molecules(GO:0007156);biological_process:blood coagulation(GO:0007596);biological_process:leukocyte migration(GO:…
ENSG00000118194	-3.43335	-2.50043	0.150346	0.739973	TNNT2	K12045	molecular_function:actin binding(GO:0003779);molecular_function:structural constituent of cytoskeleton(GO:0005200);molecular_function:tropomyosin binding(GO:0005523);cellular_component:cytosol(GO:0005829);cellular_component:troponin complex(GO:0005861);cellular_component:striated muscle thin filament(GO:0005865);;biological_process:regulation of muscle contraction(GO:0006937);biological_process:r…
ENSG00000185523	-3.43335	-2.50043	0.150346	0.739973	C1orf227	_	_
ENSG00000196660	-3.43335	-2.50043	0.150346	0.739973	SLC30A10	K14697	cellular_component:plasma membrane(GO:0005886);biological_process:zinc II ion transport(GO:0006829);molecular_function:cation transmembrane transporter activity(GO:0008324);cellular_component:integral component of membrane(GO:0016021)
ENSG00000154485	-3.43335	-2.50043	0.150346	0.739973	MMP21	K08000	molecular_function:metalloendopeptidase activity(GO:0004222);molecular_function:calcium ion binding(GO:0005509);cellular_component:extracellular region(GO:0005576);biological_process:proteolysis(GO:0006508);molecular_function:zinc ion binding(GO:0008270);cellular_component:extracellular matrix(GO:0031012)
ENSG00000255470	-3.43335	-2.50043	0.150346	0.739973	RP11-113D6.6	_	_
ENSG00000110786	-3.43335	-2.50043	0.150346	0.739973	PTPN5	K18018	molecular_function:phosphotyrosine binding(GO:0001784);molecular_function:protein tyrosine phosphatase activity(GO:0004725);cellular_component:endoplasmic reticulum membrane(GO:0005789);biological_process:protein dephosphorylation(GO:0006470);cellular_component:integral component of membrane(GO:0016021)
ENSG00000165970	-3.43335	-2.50043	0.150346	0.739973	SLC6A5	K05038	molecular_function:neurotransmitter:sodium symporter activity(GO:0005328);cellular_component:plasma membrane(GO:0005886);biological_process:transport(GO:0006810);biological_process:synaptic transmission(GO:0007268);molecular_function:glycine:sodium symporter activity(GO:0015375);cellular_component:integral component of membrane(GO:0016021);biological_process:transmembrane transport(GO:0055085)
ENSG00000239856	-3.43335	-2.50043	0.150346	0.739973	RN7SL225P	_	_
ENSG00000110243	-3.43335	-2.50043	0.150346	0.739973	APOA5	K09025	molecular_function:protein binding(GO:0005515);molecular_function:phospholipid binding(GO:0005543);cellular_component:extracellular region(GO:0005576);cellular_component:extracellular space(GO:0005615);biological_process:triglyceride metabolic process(GO:0006641);biological_process:lipid transport(GO:0006869);molecular_function:enzyme activator activity(GO:0008047);molecular_function:heparin bind…
ENSG00000139155	-3.43335	-2.50043	0.150346	0.739973	SLCO1C1	K08747	molecular_function:transporter activity(GO:0005215);cellular_component:plasma membrane(GO:0005886);cellular_component:integral component of membrane(GO:0016021);biological_process:sodium-independent organic anion transport(GO:0043252);biological_process:transmembrane transport(GO:0055085)
ENSG00000100884	-3.43335	-2.50043	0.150346	0.739973	CPNE6	_	molecular_function:phosphatidylserine binding(GO:0001786);molecular_function:transporter activity(GO:0005215);molecular_function:calcium ion binding(GO:0005509);biological_process:lipid metabolic process(GO:0006629);biological_process:synaptic transmission(GO:0007268);biological_process:nervous system development(GO:0007399);cellular_component:membrane(GO:0016020);biological_process:vesicle-media…
ENSG00000258620	-3.43335	-2.50043	0.150346	0.739973	RP11-362L22.1	_	_
ENSG00000259463	-3.43335	-2.50043	0.150346	0.739973	RP11-540O11.7	_	_
ENSG00000007171	-3.43335	-2.50043	0.150346	0.739973	NOS2	K13241	biological_process:response to hypoxia(GO:0001666);biological_process:positive regulation of leukocyte mediated cytotoxicity(GO:0001912);biological_process:innate immune response in mucosa(GO:0002227);molecular_function:NADPH-hemoprotein reductase activity(GO:0003958);molecular_function:nitric-oxide synthase activity(GO:0004517);molecular_function:receptor binding(GO:0005102);molecular_function:i…
ENSG00000271049	-3.43335	-2.50043	0.150346	0.739973	CTD-2553L13.7	K09228	_
ENSG00000266559	-3.43335	-2.50043	0.150346	0.739973	MIR4530	_	_
ENSG00000260059	-3.43335	-2.50043	0.150346	0.739973	RP11-231E19.1	_	_
ENSG00000222031	-3.43335	-2.50043	0.150346	0.739973	AC023469.1	_	_
ENSG00000153246	-3.43335	-2.50043	0.150346	0.739973	PLA2R1	K06560	biological_process:cytokine production(GO:0001816);molecular_function:receptor activity(GO:0004872);cellular_component:extracellular region(GO:0005576);cellular_component:plasma membrane(GO:0005886);cellular_component:integral component of plasma membrane(GO:0005887);biological_process:receptor-mediated endocytosis(GO:0006898);cellular_component:cell surface(GO:0009986);cellular_component:integra…
ENSG00000101251	-3.43335	-2.50043	0.150346	0.739973	SEL1L2	K14026	cellular_component:integral component of membrane(GO:0016021)
ENSG00000243440	-3.43335	-2.50043	0.150346	0.739973	AF165138.7	_	_
ENSG00000183844	-3.43335	-2.50043	0.150346	0.739973	FAM3B	_	molecular_function:cytokine activity(GO:0005125);cellular_component:extracellular region(GO:0005576);cellular_component:extracellular space(GO:0005615);biological_process:apoptotic process(GO:0006915);biological_process:insulin secretion(GO:0030073)
ENSG00000128285	-3.43335	-2.50043	0.150346	0.739973	MCHR1	K04320	molecular_function:G-protein coupled receptor activity(GO:0004930);cellular_component:plasma membrane(GO:0005886);cellular_component:integral component of plasma membrane(GO:0005887);biological_process:generation of precursor metabolites and energy(GO:0006091);biological_process:G-protein coupled receptor signaling pathway(GO:0007186);biological_process:adenylate cyclase-inhibiting G-protein coup…
ENSG00000186732	-3.43335	-2.50043	0.150346	0.739973	MPPED1	_	molecular_function:molecular_function(GO:0003674);cellular_component:cellular_component(GO:0005575);biological_process:biological_process(GO:0008150);molecular_function:hydrolase activity(GO:0016787)
ENSG00000163412	-3.43335	-2.50043	0.150346	0.739973	EIF4E3	_	molecular_function:translation initiation factor activity(GO:0003743);cellular_component:cytoplasm(GO:0005737);cellular_component:cytosol(GO:0005829);cellular_component:mRNA cap binding complex(GO:0005845);biological_process:regulation of translation(GO:0006417);biological_process:cytokine-mediated signaling pathway(GO:0019221)
ENSG00000251317	-3.43335	-2.50043	0.150346	0.739973	KLF17P2	_	_
ENSG00000039537	-3.43335	-2.50043	0.150346	0.739973	C6	K03995	biological_process:in utero embryonic development(GO:0001701);biological_process:positive regulation of activation of membrane attack complex(GO:0001970);molecular_function:protein binding(GO:0005515);cellular_component:extracellular region(GO:0005576);cellular_component:membrane attack complex(GO:0005579);biological_process:complement activation(GO:0006956);biological_process:complement activati…
ENSG00000255587	-3.43335	-2.50043	0.150346	0.739973	RAB44	_	molecular_function:GTP binding(GO:0005525);cellular_component:plasma membrane(GO:0005886);biological_process:small GTPase mediated signal transduction(GO:0007264);biological_process:protein transport(GO:0015031)
ENSG00000232290	-3.43335	-2.50043	0.150346	0.739973	RP1-292B18.3	_	_
ENSG00000105851	-3.43335	-2.50043	0.150346	0.739973	PIK3CG	K00922	biological_process:angiogenesis(GO:0001525);biological_process:cytokine production(GO:0001816);biological_process:adaptive immune response(GO:0002250);biological_process:dendritic cell chemotaxis(GO:0002407);biological_process:positive regulation of acute inflammatory response(GO:0002675);biological_process:respiratory burst involved in defense response(GO:0002679);molecular_function:protein kina…
ENSG00000159860	-3.43335	-2.50043	0.150346	0.739973	FAM115D	_	_
ENSG00000069206	-3.43335	-2.50043	0.150346	0.739973	ADAM7	K16071	molecular_function:metalloendopeptidase activity(GO:0004222);cellular_component:plasma membrane(GO:0005886);biological_process:proteolysis(GO:0006508);molecular_function:zinc ion binding(GO:0008270);cellular_component:integral component of membrane(GO:0016021)
ENSG00000010438	-3.43335	-2.50043	0.150346	0.739973	PRSS3	K01312	molecular_function:serine-type endopeptidase activity(GO:0004252);molecular_function:calcium ion binding(GO:0005509);molecular_function:protein binding(GO:0005515);cellular_component:extracellular region(GO:0005576);cellular_component:extracellular space(GO:0005615);biological_process:proteolysis(GO:0006508);biological_process:vitamin metabolic process(GO:0006766);biological_process:water-soluble…
ENSG00000200141	-3.43335	-2.50043	0.150346	0.739973	Y_RNA	_	_
ENSG00000185915	-3.43335	-2.50043	0.150346	0.739973	KLHL34	K10469	_
ENSG00000229491	-3.43335	-2.50043	0.150346	0.739973	RP11-342D14.1	_	_
ENSG00000235262	-3.43335	-2.50043	0.150346	0.739973	KDM5C-IT1	_	_
ENSG00000116774	-3.429	-2.50048	0.150346	0.739973	OLFML3	_	cellular_component:extracellular region(GO:0005576);biological_process:multicellular organismal development(GO:0007275)
ENSG00000225217	-3.429	-2.50048	0.150346	0.739973	HSPA7	K03283	molecular_function:ATP binding(GO:0005524);biological_process:response to unfolded protein(GO:0006986);cellular_component:COP9 signalosome(GO:0008180)
ENSG00000162753	-3.429	-2.50048	0.150346	0.739973	SLC9C2	K14726	biological_process:sodium ion transport(GO:0006814);molecular_function:solute:proton antiporter activity(GO:0015299);cellular_component:integral component of membrane(GO:0016021)
ENSG00000252371	-3.429	-2.50048	0.150346	0.739973	RNU6-725P	_	_
ENSG00000202184	-3.429	-2.50048	0.150346	0.739973	RNU6-1283P	_	_
ENSG00000221063	-3.429	-2.50048	0.150346	0.739973	MIR1296	_	_
ENSG00000166408	-3.429	-2.50048	0.150346	0.739973	OR5P1P	K04257	_
ENSG00000231817	-3.429	-2.50048	0.150346	0.739973	RP11-189B4.6	_	_
ENSG00000223617	-3.429	-2.50048	0.150346	0.739973	LINC00370	_	_
ENSG00000100626	-3.429	-2.50048	0.150346	0.739973	GALNT16	K00710	cellular_component:Golgi membrane(GO:0000139);molecular_function:polypeptide N-acetylgalactosaminyltransferase activity(GO:0004653);biological_process:protein glycosylation(GO:0006486);cellular_component:integral component of membrane(GO:0016021)
ENSG00000265677	-3.429	-2.50048	0.150346	0.739973	AL137229.1	_	_
ENSG00000261048	-3.429	-2.50048	0.150346	0.739973	RP11-810K23.9	_	_
ENSG00000199856	-3.429	-2.50048	0.150346	0.739973	U3	_	_
ENSG00000267497	-3.429	-2.50048	0.150346	0.739973	NFE2L3P1	K09040	_
ENSG00000226622	-3.429	-2.50048	0.150346	0.739973	AC092155.4	_	_
ENSG00000199570	-3.429	-2.50048	0.150346	0.739973	RNU6-228P	_	_
ENSG00000273464	-3.429	-2.50048	0.150346	0.739973	RP11-313P22.1	_	_
ENSG00000263969	-3.429	-2.50048	0.150346	0.739973	RN7SL678P	_	_
ENSG00000229986	-3.429	-2.50048	0.150346	0.739973	AP001042.1	_	_
ENSG00000183090	-3.429	-2.50048	0.150346	0.739973	FREM3	_	cellular_component:basement membrane(GO:0005604);biological_process:cell communication(GO:0007154);biological_process:cell adhesion(GO:0007155);cellular_component:integral component of membrane(GO:0016021);cellular_component:extracellular matrix(GO:0031012);molecular_function:metal ion binding(GO:0046872)
ENSG00000271874	-3.429	-2.50048	0.150346	0.739973	CTD-2024P10.2	_	_
ENSG00000232949	-3.429	-2.50048	0.150346	0.739973	AC002480.4	_	_
ENSG00000273069	-3.429	-2.50048	0.150346	0.739973	RP5-1186P10.2	_	_
ENSG00000197462	-3.429	-2.50048	0.150346	0.739973	AC005276.1	_	_
ENSG00000228862	-3.429	-2.50048	0.150346	0.739973	RP11-91I20.3	_	_
ENSG00000255289	-3.429	-2.50048	0.150346	0.739973	RP11-91I20.1	_	_
ENSG00000229010	-3.42176	-2.50056	0.150346	0.739973	RP5-979D14.1	_	_
ENSG00000201448	-3.42176	-2.50056	0.150346	0.739973	SNORA63	_	_
ENSG00000206931	-3.42176	-2.50056	0.150346	0.739973	RNU6-1042P	_	_
ENSG00000134389	-3.42176	-2.50056	0.150346	0.739973	CFHR5	K04004	cellular_component:extracellular region(GO:0005576);biological_process:complement activation, alternative pathway(GO:0006957)
ENSG00000116852	-3.42176	-2.50056	0.150346	0.739973	KIF21B	K10395	molecular_function:microtubule motor activity(GO:0003777);molecular_function:ATP binding(GO:0005524);cellular_component:cytoplasm(GO:0005737);cellular_component:kinesin complex(GO:0005871);cellular_component:microtubule(GO:0005874);biological_process:microtubule-based movement(GO:0007018);molecular_function:microtubule binding(GO:0008017)
ENSG00000237540	-3.42176	-2.50056	0.150346	0.739973	RP11-730A19.7	K02929	_
ENSG00000237280	-3.42176	-2.50056	0.150346	0.739973	RP11-96C23.9	_	_
ENSG00000235268	-3.42176	-2.50056	0.150346	0.739973	KDM4E	K06709	cellular_component:nucleus(GO:0005634);biological_process:transcription, DNA-templated(GO:0006351);biological_process:regulation of transcription, DNA-templated(GO:0006355);biological_process:chromatin modification(GO:0016568);molecular_function:metal ion binding(GO:0046872);molecular_function:dioxygenase activity(GO:0051213)
ENSG00000259090	-3.42176	-2.50056	0.150346	0.739973	RP11-173D9.5	K16944	_
ENSG00000259964	-3.42176	-2.50056	0.150346	0.739973	RP11-673C5.2	_	_
ENSG00000166743	-3.42176	-2.50056	0.150346	0.739973	ACSM1	K01896	molecular_function:catalytic activity(GO:0003824);molecular_function:acyl-CoA ligase activity(GO:0003996);molecular_function:ATP binding(GO:0005524);molecular_function:GTP binding(GO:0005525);cellular_component:mitochondrion(GO:0005739);cellular_component:mitochondrial matrix(GO:0005759);biological_process:fatty acid biosynthetic process(GO:0006633);biological_process:xenobiotic metabolic process…
ENSG00000251868	-3.42176	-2.50056	0.150346	0.739973	RNU7-71P	_	_
ENSG00000269898	-3.42176	-2.50056	0.150346	0.739973	RP11-568J23.4	_	_
ENSG00000173908	-3.42176	-2.50056	0.150346	0.739973	KRT28	K07604	molecular_function:structural molecule activity(GO:0005198);cellular_component:cytoplasm(GO:0005737);cellular_component:intermediate filament(GO:0005882)
ENSG00000261978	-3.42176	-2.50056	0.150346	0.739973	CTD-2529O21.2	_	_
ENSG00000267167	-3.42176	-2.50056	0.150346	0.739973	RP11-687F6.1	_	_
ENSG00000267749	-3.42176	-2.50056	0.150346	0.739973	CTC-265F19.1	_	_
ENSG00000130167	-3.42176	-2.50056	0.150346	0.739973	TSPAN16	K17357	cellular_component:integral component of membrane(GO:0016021)
ENSG00000131126	-3.42176	-2.50056	0.150346	0.739973	TEX101	_	cellular_component:acrosomal membrane(GO:0002080);cellular_component:plasma membrane(GO:0005886);cellular_component:anchored component of membrane(GO:0031225)
ENSG00000267522	-3.42176	-2.50056	0.150346	0.739973	CTD-2621I17.6	_	_
ENSG00000130294	-3.42176	-2.50056	0.150346	0.739973	KIF1A	K10392	molecular_function:motor activity(GO:0003774);molecular_function:microtubule motor activity(GO:0003777);molecular_function:ATP binding(GO:0005524);molecular_function:phospholipid binding(GO:0005543);cellular_component:nucleus(GO:0005634);cellular_component:cytoplasm(GO:0005737);cellular_component:kinesin complex(GO:0005871);cellular_component:microtubule(GO:0005874);biological_process:microtubule…
ENSG00000235621	-3.42176	-2.50056	0.150346	0.739973	LINC00494	_	_
ENSG00000225867	-3.42176	-2.50056	0.150346	0.739973	RP5-1177I5.3	_	_
ENSG00000243883	-3.42176	-2.50056	0.150346	0.739973	RN7SL419P	_	_
ENSG00000094755	-3.42176	-2.50056	0.150346	0.739973	GABRP	K05189	molecular_function:GABA-A receptor activity(GO:0004890);molecular_function:extracellular ligand-gated ion channel activity(GO:0005230);molecular_function:chloride channel activity(GO:0005254);cellular_component:plasma membrane(GO:0005886);biological_process:ion transport(GO:0006811);cellular_component:membrane(GO:0016020);cellular_component:integral component of membrane(GO:0016021);cellular_comp…
ENSG00000146250	-3.42176	-2.50056	0.150346	0.739973	PRSS35	_	molecular_function:catalytic activity(GO:0003824);cellular_component:extracellular region(GO:0005576);cellular_component:mitochondrion(GO:0005739)
ENSG00000173612	-3.42176	-2.50056	0.150346	0.739973	GPRC6A	K04622	molecular_function:G-protein coupled receptor activity(GO:0004930);cellular_component:plasma membrane(GO:0005886);cellular_component:cell surface(GO:0009986);cellular_component:integral component of membrane(GO:0016021);biological_process:calcium-mediated signaling(GO:0019722);biological_process:response to amino acid(GO:0043200)
ENSG00000272446	-3.42176	-2.50056	0.150346	0.739973	RP1-225E12.3	_	_
ENSG00000118491	-3.42176	-2.50056	0.150346	0.739973	ZC2HC1B	K14798	molecular_function:metal ion binding(GO:0046872)
ENSG00000238939	-3.42176	-2.50056	0.150346	0.739973	snoU13	_	_
ENSG00000264814	-3.42176	-2.50056	0.150346	0.739973	MIR1273C	_	_
ENSG00000184408	-3.42176	-2.50056	0.150346	0.739973	KCND2	K04892	biological_process:action potential(GO:0001508);molecular_function:voltage-gated potassium channel activity(GO:0005249);molecular_function:A-type (transient outward) potassium channel activity(GO:0005250);molecular_function:delayed rectifier potassium channel activity(GO:0005251);molecular_function:protein binding(GO:0005515);cellular_component:plasma membrane(GO:0005886);biological_process:synap…
ENSG00000225017	-3.42176	-2.50056	0.150346	0.739973	AP004289.1	K01681	_
ENSG00000238222	-3.42176	-2.50056	0.150346	0.739973	MKRN4P	K15687	molecular_function:zinc ion binding(GO:0008270);biological_process:protein ubiquitination(GO:0016567);molecular_function:ligase activity(GO:0016874)
ENSG00000232828	-3.42176	-2.50056	0.150346	0.739973	AF196970.3	_	_
ENSG00000252525	-3.42176	-2.50056	0.150346	0.739973	snoU13	_	_
ENSG00000101890	-3.42176	-2.50056	0.150346	0.739973	GUCY2F	K12321	molecular_function:guanylate cyclase activity(GO:0004383);molecular_function:protein kinase activity(GO:0004672);molecular_function:receptor activity(GO:0004872);molecular_function:ATP binding(GO:0005524);molecular_function:GTP binding(GO:0005525);cellular_component:nuclear outer membrane(GO:0005640);cellular_component:integral component of plasma membrane(GO:0005887);biological_process:receptor …
ENSG00000261916	-3.32689	-1.64368	0.00615351	0.0601992	RP11-235E17.4	_	_
ENSG00000134376	-3.29281	-1.69324	0.0013434	0.0164251	CRB1	K16681	molecular_function:calcium ion binding(GO:0005509);cellular_component:extracellular region(GO:0005576);cellular_component:plasma membrane(GO:0005886);cellular_component:microvillus(GO:0005902);biological_process:plasma membrane organization(GO:0007009);biological_process:establishment or maintenance of cell polarity(GO:0007163);biological_process:cell-cell signaling(GO:0007267);cellular_component…
ENSG00000103184	-3.29139	-1.69352	0.00131669	0.0161429	SEC14L5	_	molecular_function:transporter activity(GO:0005215);cellular_component:intracellular(GO:0005622);cellular_component:integral component of membrane(GO:0016021)
ENSG00000272894	-3.28933	-1.69366	0.00263255	0.029315	RP5-1159O4.1	_	_
ENSG00000168918	-3.28882	-1.69366	0.00150775	0.018117	INPP5D	K03084	molecular_function:inositol-polyphosphate 5-phosphatase activity(GO:0004445);molecular_function:protein binding(GO:0005515);cellular_component:cytosol(GO:0005829);biological_process:phospholipid metabolic process(GO:0006644);biological_process:phosphatidylinositol biosynthetic process(GO:0006661);biological_process:phosphate-containing compound metabolic process(GO:0006796);biological_process:apo…
ENSG00000222047	-3.28819	-1.69368	0.00158729	0.0189393	C10orf55	K01348	_
ENSG00000187955	-3.26022	-0.801241	1.59e-07	4.48e-06	COL14A1	K08133	biological_process:ventricular cardiac muscle tissue development(GO:0003229);molecular_function:extracellular matrix structural constituent(GO:0005201);molecular_function:collagen binding(GO:0005518);cellular_component:extracellular region(GO:0005576);cellular_component:proteinaceous extracellular matrix(GO:0005578);cellular_component:collagen trimer(GO:0005581);cellular_component:collagen type X…
ENSG00000187123	-3.22242	-1.74559	0.00901799	0.0833366	LYPD6	_	cellular_component:extracellular region(GO:0005576)
ENSG00000260910	-3.20386	-1.21657	5.51e-05	0.000960997	LINC00565	_	_
ENSG00000179300	-3.19264	-1.74612	0.00264224	0.0294115	ZCCHC5	_	molecular_function:nucleic acid binding(GO:0003676);molecular_function:zinc ion binding(GO:0008270)
ENSG00000261554	-3.19233	-1.74616	0.00253673	0.0284008	RP11-810K23.10	_	_
ENSG00000233085	-3.19113	-1.7462	0.0026761	0.029715	XXyac-YX65C7_A.3	_	_
ENSG00000074047	-3.16321	-1.74657	0.00901799	0.0833366	GLI2	K16798	biological_process:negative regulation of transcription from RNA polymerase II promoter(GO:0000122);biological_process:skeletal system development(GO:0001501);biological_process:osteoblast differentiation(GO:0001649);biological_process:in utero embryonic development(GO:0001701);biological_process:kidney development(GO:0001822);biological_process:osteoblast development(GO:0002076);molecular_functi…
ENSG00000117069	-3.15428	-1.25365	0.000819839	0.0106346	ST6GALNAC5	K03375	molecular_function:alpha-N-acetylgalactosaminide alpha-2,6-sialyltransferase activity(GO:0001665);cellular_component:Golgi apparatus(GO:0005794);biological_process:protein glycosylation(GO:0006486);biological_process:glycosphingolipid biosynthetic process(GO:0006688);molecular_function:sialyltransferase activity(GO:0008373);biological_process:oligosaccharide biosynthetic process(GO:0009312);cellu…
ENSG00000074211	-3.15087	-1.25358	8.45e-05	0.00141942	PPP2R2C	K04354	cellular_component:protein phosphatase type 2A complex(GO:0000159);biological_process:signal transduction(GO:0007165);molecular_function:protein phosphatase type 2A regulator activity(GO:0008601)
ENSG00000232470	-3.14929	-1.25386	7.11e-05	0.00121005	RP11-313D6.3	_	_
ENSG00000224215	-3.09686	-1.80013	0.00629778	0.0613618	RP11-371A19.2	_	_
ENSG00000168454	-3.09682	-1.80004	0.0049744	0.0504453	TXNDC2	_	cellular_component:outer dense fiber(GO:0001520);molecular_function:protein disulfide isomerase activity(GO:0003756);molecular_function:thioredoxin-disulfide reductase activity(GO:0004791);cellular_component:nucleus(GO:0005634);cellular_component:nucleolus(GO:0005730);cellular_component:cytoplasm(GO:0005737);biological_process:glycerol ether metabolic process(GO:0006662);biological_process:multic…
ENSG00000269978	-3.09461	-1.79996	0.00497264	0.0504363	RP11-338N10.3	_	_
ENSG00000104490	-3.09347	-1.80023	0.0044317	0.0457511	NCALD	_	molecular_function:actin binding(GO:0003779);molecular_function:calcium ion binding(GO:0005509);cellular_component:intracellular(GO:0005622);cellular_component:cytosol(GO:0005829);biological_process:synaptic transmission(GO:0007268);molecular_function:tubulin binding(GO:0015631);biological_process:vesicle-mediated transport(GO:0016192);cellular_component:clathrin coat of trans-Golgi network vesic…
ENSG00000131686	-3.09213	-2.59317	0.274957	1	CA6	K01672	molecular_function:carbonate dehydratase activity(GO:0004089);cellular_component:extracellular region(GO:0005576);cellular_component:extracellular space(GO:0005615);cellular_component:cytoplasm(GO:0005737);biological_process:one-carbon metabolic process(GO:0006730);molecular_function:zinc ion binding(GO:0008270);biological_process:bicarbonate transport(GO:0015701);biological_process:small molecul…
ENSG00000000938	-3.09213	-2.59317	0.274957	1	FGR	K08891	molecular_function:phosphotyrosine binding(GO:0001784);biological_process:immune response-regulating cell surface receptor signaling pathway(GO:0002768);molecular_function:protein tyrosine kinase activity(GO:0004713);molecular_function:non-membrane spanning protein tyrosine kinase activity(GO:0004715);molecular_function:protein binding(GO:0005515);molecular_function:ATP binding(GO:0005524);cellul…
ENSG00000228056	-3.09213	-2.59317	0.274957	1	CFL1P3	K05765	_
ENSG00000012779	-3.09213	-2.59317	0.274957	1	ALOX5	K00461	biological_process:leukotriene production involved in inflammatory response(GO:0002540);molecular_function:arachidonate 5-lipoxygenase activity(GO:0004051);molecular_function:iron ion binding(GO:0005506);molecular_function:protein binding(GO:0005515);cellular_component:nuclear envelope(GO:0005635);cellular_component:nuclear envelope lumen(GO:0005641);cellular_component:cytosol(GO:0005829);biologi…
ENSG00000233163	-3.09213	-2.59317	0.274957	1	RP11-259F16.3	K02951	_
ENSG00000225850	-3.09213	-2.59317	0.274957	1	RP11-452K12.4	_	_
ENSG00000176895	-3.09213	-2.59317	0.274957	1	OR51A7	K04257	molecular_function:G-protein coupled receptor activity(GO:0004930);molecular_function:olfactory receptor activity(GO:0004984);cellular_component:plasma membrane(GO:0005886);cellular_component:integral component of membrane(GO:0016021)
ENSG00000255496	-3.09213	-2.59317	0.274957	1	RP11-587D21.4	_	_
ENSG00000110079	-3.09213	-2.59317	0.274957	1	MS4A4A	_	cellular_component:integral component of membrane(GO:0016021)
ENSG00000256349	-3.09213	-2.59317	0.274957	1	CTD-3074O7.11	K16746	_
ENSG00000137707	-3.09213	-2.59317	0.274957	1	BTG4	K14443	cellular_component:cellular_component(GO:0005575);biological_process:cell cycle arrest(GO:0007050);biological_process:negative regulation of cell proliferation(GO:0008285);biological_process:neuron differentiation(GO:0030182);biological_process:negative regulation of mitotic cell cycle(GO:0045930)
ENSG00000254944	-3.09213	-2.59317	0.274957	1	ATP5F1P5	K02127	_
ENSG00000256790	-3.09213	-2.59317	0.274957	1	RP11-429A20.3	_	_
ENSG00000257735	-3.09213	-2.59317	0.274957	1	RP11-370I10.6	_	_
ENSG00000258104	-3.09213	-2.59317	0.274957	1	HIGD1AP9	_	_
ENSG00000224419	-3.09213	-2.59317	0.274957	1	KRT18P27	K07604	_
ENSG00000092096	-3.09213	-2.59317	0.274957	1	SLC22A17	K08213	molecular_function:transmembrane signaling receptor activity(GO:0004888);cellular_component:vacuolar membrane(GO:0005774);cellular_component:integral component of plasma membrane(GO:0005887);biological_process:ion transport(GO:0006811);biological_process:siderophore transport(GO:0015891);cellular_component:integral component of membrane(GO:0016021);molecular_function:transmembrane transporter act…
ENSG00000263179	-3.09213	-2.59317	0.274957	1	HNRNPCP4	K12884	_
ENSG00000006074	-3.09213	-2.59317	0.274957	1	CCL18	K05514	molecular_function:protein binding(GO:0005515);cellular_component:extracellular space(GO:0005615);biological_process:chemotaxis(GO:0006935);biological_process:inflammatory response(GO:0006954);biological_process:immune response(GO:0006955);biological_process:cell communication(GO:0007154);biological_process:signal transduction(GO:0007165);biological_process:cell-cell signaling(GO:0007267);molecul…
ENSG00000171360	-3.09213	-2.59317	0.274957	1	KRT38	K07604	molecular_function:structural molecule activity(GO:0005198);cellular_component:intermediate filament(GO:0005882)
ENSG00000267765	-3.09213	-2.59317	0.274957	1	CTD-3193K9.3	_	_
ENSG00000186244	-3.09213	-2.59317	0.274957	1	RP11-1079K10.1	K02889	_
ENSG00000252234	-3.09213	-2.59317	0.274957	1	AC006557.1	_	_
ENSG00000206075	-3.09213	-2.59317	0.274957	1	SERPINB5	K10139	biological_process:morphogenesis of an epithelium(GO:0002009);molecular_function:serine-type endopeptidase inhibitor activity(GO:0004867);molecular_function:protein binding(GO:0005515);cellular_component:extracellular space(GO:0005615);cellular_component:cytoplasm(GO:0005737);biological_process:movement of cell or subcellular component(GO:0006928);biological_process:negative regulation of endopep…
ENSG00000166634	-3.09213	-2.59317	0.274957	1	SERPINB12	K13966	molecular_function:serine-type endopeptidase inhibitor activity(GO:0004867);cellular_component:cytoplasm(GO:0005737);biological_process:negative regulation of endopeptidase activity(GO:0010951);molecular_function:enzyme binding(GO:0019899);biological_process:regulation of proteolysis(GO:0030162);biological_process:negative regulation of protein catabolic process(GO:0042177)
ENSG00000171954	-3.09213	-2.59317	0.274957	1	CYP4F22	K17731	molecular_function:monooxygenase activity(GO:0004497);molecular_function:iron ion binding(GO:0005506);cellular_component:endoplasmic reticulum membrane(GO:0005789);molecular_function:electron carrier activity(GO:0009055);molecular_function:oxidoreductase activity, acting on paired donors, with incorporation or reduction of molecular oxygen(GO:0016705);molecular_function:heme binding(GO:0020037)
ENSG00000267581	-3.09213	-2.59317	0.274957	1	CTC-559E9.4	_	_
ENSG00000265650	-3.09213	-2.59317	0.274957	1	AC012627.1	_	_
ENSG00000198597	-3.09213	-2.59317	0.274957	1	ZNF536	_	molecular_function:nucleic acid binding(GO:0003676);cellular_component:nucleus(GO:0005634);biological_process:transcription, DNA-templated(GO:0006351);biological_process:regulation of transcription, DNA-templated(GO:0006355);molecular_function:retinoic acid-responsive element binding(GO:0044323);biological_process:negative regulation of neuron differentiation(GO:0045665);molecular_function:metal …
ENSG00000268041	-3.09213	-2.59317	0.274957	1	CTD-2575K13.6	K09434	_
ENSG00000214842	-3.09213	-2.59317	0.274957	1	RAD51AP2	_	_
ENSG00000233479	-3.09213	-2.59317	0.274957	1	AC017074.1	_	_
ENSG00000240761	-3.09213	-2.59317	0.274957	1	AC098831.4	K11001	_
ENSG00000273301	-3.09213	-2.59317	0.274957	1	RP11-314B1.2	_	_
ENSG00000235013	-3.09213	-2.59317	0.274957	1	COX20P2	K18184	_
ENSG00000144644	-3.09213	-2.59317	0.274957	1	GADL1	K18966	molecular_function:carboxy-lyase activity(GO:0016831);biological_process:carboxylic acid metabolic process(GO:0019752);molecular_function:pyridoxal phosphate binding(GO:0030170)
ENSG00000179934	-3.09213	-2.59317	0.274957	1	CCR8	K04183	molecular_function:chemokine receptor activity(GO:0004950);cellular_component:plasma membrane(GO:0005886);cellular_component:integral component of plasma membrane(GO:0005887);biological_process:chemotaxis(GO:0006935);biological_process:immune response(GO:0006955);biological_process:cell adhesion(GO:0007155);biological_process:G-protein coupled receptor signaling pathway(GO:0007186);biological_pro…
ENSG00000173769	-3.09213	-2.59317	0.274957	1	TOPAZ1	_	cellular_component:cytosol(GO:0005829);molecular_function:metal ion binding(GO:0046872)
ENSG00000244730	-3.09213	-2.59317	0.274957	1	RP13-1056D16.2	K12834	_
ENSG00000239568	-3.09213	-2.59317	0.274957	1	RP11-654C22.1	_	_
ENSG00000243429	-3.09213	-2.59317	0.274957	1	OR7E29P	K04257	_
ENSG00000240006	-3.09213	-2.59317	0.274957	1	RP11-200A1.1	_	_
ENSG00000144891	-3.09213	-2.59317	0.274957	1	AGTR1	K04166	biological_process:regulation of cell growth(GO:0001558);molecular_function:angiotensin type I receptor activity(GO:0001596);biological_process:kidney development(GO:0001822);biological_process:renin-angiotensin regulation of aldosterone production(GO:0002018);biological_process:regulation of blood vessel size by renin-angiotensin(GO:0002034);biological_process:regulation of systemic arterial blo…
ENSG00000252975	-3.09213	-2.59317	0.274957	1	Y_RNA	_	_
ENSG00000135226	-3.09213	-2.59317	0.274957	1	UGT2B28	K00699	cellular_component:endoplasmic reticulum(GO:0005783);cellular_component:endoplasmic reticulum membrane(GO:0005789);biological_process:xenobiotic metabolic process(GO:0006805);biological_process:metabolic process(GO:0008152);molecular_function:glucuronosyltransferase activity(GO:0015020);cellular_component:integral component of membrane(GO:0016021)
ENSG00000152591	-3.09213	-2.59317	0.274957	1	DSPP	_	biological_process:skeletal system development(GO:0001501);biological_process:ossification(GO:0001503);molecular_function:extracellular matrix structural constituent(GO:0005201);molecular_function:calcium ion binding(GO:0005509);molecular_function:collagen binding(GO:0005518);cellular_component:proteinaceous extracellular matrix(GO:0005578);biological_process:multicellular organismal development(…
ENSG00000224349	-3.09213	-2.59317	0.274957	1	RP11-462G2.2	_	_
ENSG00000220237	-3.09213	-2.59317	0.274957	1	RPS24P12	_	_
ENSG00000182348	-3.09213	-2.59317	0.274957	1	ZNF804B	K00012	cellular_component:nucleus(GO:0005634);cellular_component:nucleolus(GO:0005730);cellular_component:cytoplasm(GO:0005737);molecular_function:metal ion binding(GO:0046872)
ENSG00000272219	-3.09213	-2.59317	0.274957	1	CTB-181H17.1	_	_
ENSG00000223113	-3.09213	-2.59317	0.274957	1	RNA5SP247	_	_
ENSG00000221813	-3.09213	-2.59317	0.274957	1	OR6B1	K04257	molecular_function:G-protein coupled receptor activity(GO:0004930);molecular_function:olfactory receptor activity(GO:0004984);cellular_component:plasma membrane(GO:0005886);cellular_component:integral component of membrane(GO:0016021)
ENSG00000237647	-3.09213	-2.59317	0.274957	1	ERICH1-AS1	_	_
ENSG00000168546	-3.09213	-2.59317	0.274957	1	GFRA2	_	molecular_function:receptor activity(GO:0004872);cellular_component:plasma membrane(GO:0005886);biological_process:transmembrane receptor protein tyrosine kinase signaling pathway(GO:0007169);biological_process:nervous system development(GO:0007399);molecular_function:glial cell-derived neurotrophic factor receptor activity(GO:0016167);cellular_component:extrinsic component of membrane(GO:0019898…
ENSG00000169495	-3.09213	-2.59317	0.274957	1	HTRA4	K08786	biological_process:regulation of cell growth(GO:0001558);molecular_function:endopeptidase activity(GO:0004175);molecular_function:serine-type endopeptidase activity(GO:0004252);molecular_function:insulin-like growth factor binding(GO:0005520);cellular_component:extracellular region(GO:0005576);biological_process:proteolysis(GO:0006508);biological_process:negative regulation of transforming growth…
ENSG00000169122	-3.09213	-2.59317	0.274957	1	FAM110B	_	cellular_component:nucleus(GO:0005634);cellular_component:cytoplasm(GO:0005737);cellular_component:mitochondrion(GO:0005739);cellular_component:microtubule organizing center(GO:0005815)
ENSG00000147697	-3.09213	-2.59317	0.274957	1	GSDMC	_	molecular_function:molecular_function(GO:0003674);cellular_component:cytoplasm(GO:0005737);cellular_component:mitochondrion(GO:0005739);biological_process:biological_process(GO:0008150)
ENSG00000224815	-3.09213	-2.59317	0.274957	1	RP11-307E17.9	K18751	_
ENSG00000263979	-3.09213	-2.59317	0.274957	1	MIR4672	_	_
ENSG00000077279	-3.09213	-2.59317	0.274957	1	DCX	K16579	biological_process:neuron migration(GO:0001764);cellular_component:intracellular(GO:0005622);cellular_component:cytosol(GO:0005829);cellular_component:cytoskeleton(GO:0005856);cellular_component:microtubule(GO:0005874);cellular_component:microtubule associated complex(GO:0005875);biological_process:nervous system development(GO:0007399);biological_process:axon guidance(GO:0007411);biological_proc…
ENSG00000180772	-3.09213	-2.59317	0.274957	1	AGTR2	K04167	biological_process:blood vessel remodeling(GO:0001974);biological_process:regulation of systemic arterial blood pressure by circulatory renin-angiotensin(GO:0001991);biological_process:renin-angiotensin regulation of aldosterone production(GO:0002018);biological_process:vasodilation by angiotensin involved in regulation of systemic arterial blood pressure(GO:0002033);biological_process:brain reni…
ENSG00000184347	-3.09197	-1.80024	0.00441332	0.0455776	SLIT3	K06850	molecular_function:calcium ion binding(GO:0005509);cellular_component:extracellular region(GO:0005576);cellular_component:extracellular space(GO:0005615);cellular_component:mitochondrion(GO:0005739);biological_process:axon guidance(GO:0007411);biological_process:negative regulation of cell proliferation(GO:0008285);biological_process:organ morphogenesis(GO:0009887);biological_process:negative reg…
ENSG00000203805	-3.09104	-1.29176	0.000398433	0.00564228	PPAPDC1A	_	molecular_function:catalytic activity(GO:0003824);cellular_component:plasma membrane(GO:0005886);molecular_function:phosphatidate phosphatase activity(GO:0008195);cellular_component:membrane(GO:0016020);cellular_component:integral component of membrane(GO:0016021);biological_process:Fc-gamma receptor signaling pathway involved in phagocytosis(GO:0038096);biological_process:innate immune response(…
ENSG00000101425	-3.09082	-1.80041	0.00445457	0.0459381	BPI	_	molecular_function:lipopolysaccharide binding(GO:0001530);cellular_component:extracellular region(GO:0005576);cellular_component:cytoplasm(GO:0005737);cellular_component:integral component of plasma membrane(GO:0005887);biological_process:immune response(GO:0006955);molecular_function:lipid binding(GO:0008289);biological_process:negative regulation of interleukin-6 production(GO:0032715);biologic…
ENSG00000115896	-3.08934	-1.80025	0.00438728	0.0453572	PLCL1	_	molecular_function:phosphatidylinositol phospholipase C activity(GO:0004435);molecular_function:phospholipase C activity(GO:0004629);molecular_function:signal transducer activity(GO:0004871);molecular_function:calcium ion binding(GO:0005509);molecular_function:phospholipid binding(GO:0005543);cellular_component:cytoplasm(GO:0005737);biological_process:lipid metabolic process(GO:0006629);biologica…
ENSG00000112936	-3.08872	-1.80045	0.00450218	0.0463537	C7	K03996	cellular_component:extracellular region(GO:0005576);cellular_component:membrane attack complex(GO:0005579);biological_process:complement activation(GO:0006956);biological_process:complement activation, alternative pathway(GO:0006957);biological_process:complement activation, classical pathway(GO:0006958);biological_process:cytolysis(GO:0019835);biological_process:regulation of complement activati…
ENSG00000256091	-3.08749	-2.59321	0.274957	1	RP11-627G1.1	K02835	_
ENSG00000151136	-3.08749	-2.59321	0.274957	1	BTBD11	K10483	cellular_component:integral component of membrane(GO:0016021);molecular_function:protein heterodimerization activity(GO:0046982)
ENSG00000260810	-3.08749	-2.59321	0.274957	1	CTD-2547L24.4	_	_
ENSG00000153933	-3.08749	-2.59321	0.274957	1	DGKE	K00901	molecular_function:diacylglycerol kinase activity(GO:0004143);molecular_function:ATP binding(GO:0005524);cellular_component:cytoplasm(GO:0005737);cellular_component:plasma membrane(GO:0005886);biological_process:protein kinase C-activating G-protein coupled receptor signaling pathway(GO:0007205);biological_process:blood coagulation(GO:0007596);biological_process:phospholipid biosynthetic process(…
ENSG00000267735	-3.08749	-2.59321	0.274957	1	CTD-2265O21.7	_	_
ENSG00000126262	-3.08749	-2.59321	0.274957	1	FFAR2	K04328	molecular_function:G-protein coupled receptor activity(GO:0004930);cellular_component:plasma membrane(GO:0005886);cellular_component:integral component of plasma membrane(GO:0005887);biological_process:G-protein coupled receptor signaling pathway(GO:0007186);molecular_function:lipid binding(GO:0008289);cellular_component:cell projection(GO:0042995)
ENSG00000226963	-3.08749	-2.59321	0.274957	1	AC078883.4	_	_
ENSG00000232218	-3.08749	-2.59321	0.274957	1	RP1-149A16.16	_	_
ENSG00000243321	-3.08749	-2.59321	0.274957	1	snoU13	_	_
ENSG00000214146	-3.08749	-2.59321	0.274957	1	RP11-699L21.1	_	_
ENSG00000248360	-3.08749	-2.59321	0.274957	1	LINC00504	_	_
ENSG00000253194	-3.08749	-2.59321	0.274957	1	RP11-351A11.1	_	_
ENSG00000203933	-3.08749	-2.59321	0.274957	1	CXorf66	_	cellular_component:integral component of membrane(GO:0016021)
ENSG00000143167	-3.08287	-2.59326	0.274957	1	GPA33	K06790	molecular_function:receptor activity(GO:0004872);cellular_component:integral component of plasma membrane(GO:0005887)
ENSG00000200942	-3.08287	-2.59326	0.274957	1	RNU6-501P	_	_
ENSG00000255492	-3.08287	-2.59326	0.274957	1	CTD-2381F24.1	K11253	_
ENSG00000259396	-3.08287	-2.59326	0.274957	1	RP11-16O9.2	_	_
ENSG00000263279	-3.08287	-2.59326	0.274957	1	RP11-109M19.1	_	_
ENSG00000261457	-3.08287	-2.59326	0.274957	1	AC002519.6	K04382	_
ENSG00000268601	-3.08287	-2.59326	0.274957	1	AC115522.3	_	_
ENSG00000185176	-3.08287	-2.59326	0.274957	1	AQP12B	K09871	molecular_function:transporter activity(GO:0005215);cellular_component:integral component of membrane(GO:0016021)
ENSG00000265355	-3.08287	-2.59326	0.274957	1	MIR3136	_	_
ENSG00000228981	-3.08287	-2.59326	0.274957	1	RP11-364L4.1	K02981	_
ENSG00000164122	-3.08287	-2.59326	0.274957	1	ASB5	K10327	biological_process:protein ubiquitination(GO:0016567);biological_process:intracellular signal transduction(GO:0035556)
ENSG00000213755	-3.08287	-2.59326	0.274957	1	RP11-342F17.1	K02905	_
ENSG00000229054	-3.08287	-2.59326	0.274957	1	AC074338.4	_	_
ENSG00000185274	-3.08287	-2.59326	0.274957	1	WBSCR17	K00710	cellular_component:Golgi membrane(GO:0000139);molecular_function:polypeptide N-acetylgalactosaminyltransferase activity(GO:0004653);biological_process:protein glycosylation(GO:0006486);cellular_component:integral component of membrane(GO:0016021);molecular_function:transferase activity, transferring glycosyl groups(GO:0016757)
ENSG00000242162	-3.08287	-2.59326	0.274957	1	RP11-128A6.3	K10956	_
ENSG00000182648	-3.08287	-2.59326	0.274957	1	LINC01006	_	_
ENSG00000228322	-3.08287	-2.59326	0.274957	1	RP11-358M14.2	_	_
ENSG00000107159	-3.08287	-2.59326	0.274957	1	CA9	K01672	biological_process:morphogenesis of an epithelium(GO:0002009);molecular_function:carbonate dehydratase activity(GO:0004089);cellular_component:nucleolus(GO:0005730);cellular_component:plasma membrane(GO:0005886);biological_process:one-carbon metabolic process(GO:0006730);molecular_function:zinc ion binding(GO:0008270);biological_process:bicarbonate transport(GO:0015701);cellular_component:integra…
ENSG00000207202	-3.08287	-2.59326	0.274957	1	RNU6-800P	_	_
ENSG00000158816	-3.07973	-2.59329	0.274957	1	VWA5B1	_	cellular_component:extracellular region(GO:0005576)
ENSG00000070886	-3.07973	-2.59329	0.274957	1	EPHA8	K05109	molecular_function:GPI-linked ephrin receptor activity(GO:0005004);molecular_function:ATP binding(GO:0005524);cellular_component:integral component of plasma membrane(GO:0005887);biological_process:substrate-dependent cell migration(GO:0006929);biological_process:cell adhesion(GO:0007155);biological_process:axon guidance(GO:0007411);biological_process:neuron remodeling(GO:0016322);biological_proc…
ENSG00000214973	-3.07973	-2.59329	0.274957	1	CHCHD3P3	K17563	_
ENSG00000162365	-3.07973	-2.59329	0.274957	1	CYP4A22	K17688	molecular_function:monooxygenase activity(GO:0004497);molecular_function:iron ion binding(GO:0005506);cellular_component:endoplasmic reticulum membrane(GO:0005789);molecular_function:electron carrier activity(GO:0009055);molecular_function:oxidoreductase activity, acting on paired donors, with incorporation or reduction of molecular oxygen(GO:0016705);molecular_function:alkane 1-monooxygenase act…
ENSG00000203914	-3.07973	-2.59329	0.274957	1	HSP90B3P	K09487	_
ENSG00000118729	-3.07973	-2.59329	0.274957	1	CASQ2	K00272	biological_process:regulation of heart rate(GO:0002027);molecular_function:calcium ion binding(GO:0005509);biological_process:detection of calcium ion(GO:0005513);molecular_function:protein binding(GO:0005515);cellular_component:intracellular(GO:0005622);cellular_component:cytoplasm(GO:0005737);cellular_component:voltage-gated calcium channel complex(GO:0005891);biological_process:striated muscle…
ENSG00000116882	-3.07973	-2.59329	0.274957	1	HAO2	K11517	molecular_function:(S)-2-hydroxy-acid oxidase activity(GO:0003973);molecular_function:receptor binding(GO:0005102);cellular_component:mitochondrion(GO:0005739);cellular_component:peroxisome(GO:0005777);molecular_function:FMN binding(GO:0010181);molecular_function:oxidoreductase activity(GO:0016491);biological_process:mandelate metabolic process(GO:0018924);biological_process:fatty acid oxidation(…
ENSG00000117501	-3.07973	-2.59329	0.274957	1	MROH9	_	_
ENSG00000116147	-3.07973	-2.59329	0.274957	1	TNR	K06252	cellular_component:extracellular region(GO:0005576);cellular_component:proteinaceous extracellular matrix(GO:0005578);cellular_component:nucleus(GO:0005634);cellular_component:nucleolus(GO:0005730);cellular_component:cytoplasm(GO:0005737);biological_process:cell adhesion(GO:0007155);biological_process:neuron cell-cell adhesion(GO:0007158);biological_process:axon guidance(GO:0007411);biological_pr…
ENSG00000122180	-3.07973	-2.59329	0.274957	1	MYOG	K18483	molecular_function:RNA polymerase II regulatory region sequence-specific DNA binding(GO:0000977);molecular_function:core promoter proximal region sequence-specific DNA binding(GO:0000987);molecular_function:RNA polymerase II transcription regulatory region sequence-specific DNA binding transcription factor activity involved in positive regulation of transcription(GO:0001228);biological_process:os…
ENSG00000135744	-3.07973	-2.59329	0.274957	1	AGT	K09821	biological_process:ovarian follicle rupture(GO:0001543);biological_process:regulation of cell growth(GO:0001558);biological_process:blood vessel development(GO:0001568);biological_process:branching involved in ureteric bud morphogenesis(GO:0001658);biological_process:positive regulation of cytokine production(GO:0001819);biological_process:kidney development(GO:0001822);biological_process:blood v…
ENSG00000223477	-3.07973	-2.59329	0.274957	1	LINC00842	_	_
ENSG00000148602	-3.07973	-2.59329	0.274957	1	LRIT1	_	molecular_function:molecular_function(GO:0003674);biological_process:biological_process(GO:0008150);cellular_component:integral component of endoplasmic reticulum membrane(GO:0030176)
ENSG00000180974	-3.07973	-2.59329	0.274957	1	OR52E4	K04257	molecular_function:G-protein coupled receptor activity(GO:0004930);molecular_function:olfactory receptor activity(GO:0004984);cellular_component:plasma membrane(GO:0005886);cellular_component:integral component of membrane(GO:0016021)
ENSG00000134571	-3.07973	-2.59329	0.274957	1	MYBPC3	K12568	molecular_function:ATPase activator activity(GO:0001671);biological_process:regulation of heart rate(GO:0002027);biological_process:heart morphogenesis(GO:0003007);molecular_function:actin binding(GO:0003779);cellular_component:cytosol(GO:0005829);cellular_component:striated muscle myosin thick filament(GO:0005863);biological_process:regulation of striated muscle contraction(GO:0006942);biologica…
ENSG00000172208	-3.07973	-2.59329	0.274957	1	OR4X2	K04257	molecular_function:G-protein coupled receptor activity(GO:0004930);molecular_function:olfactory receptor activity(GO:0004984);cellular_component:plasma membrane(GO:0005886);cellular_component:integral component of membrane(GO:0016021)
ENSG00000156689	-3.07973	-2.59329	0.274957	1	GLYATL2	_	cellular_component:mitochondrion(GO:0005739);cellular_component:endoplasmic reticulum(GO:0005783);molecular_function:glycine N-acyltransferase activity(GO:0047961)
ENSG00000213409	-3.07973	-2.59329	0.274957	1	RP11-658F2.3	K15414	_
ENSG00000168959	-3.07973	-2.59329	0.274957	1	GRM5	K04604	biological_process:activation of MAPKKK activity(GO:0000185);biological_process:desensitization of G-protein coupled receptor protein signaling pathway(GO:0002029);molecular_function:G-protein coupled receptor activity(GO:0004930);cellular_component:cytoplasm(GO:0005737);cellular_component:plasma membrane(GO:0005886);cellular_component:integral component of plasma membrane(GO:0005887);biological_…
ENSG00000149403	-3.07973	-2.59329	0.274957	1	GRIK4	K05204	molecular_function:extracellular-glutamate-gated ion channel activity(GO:0005234);cellular_component:plasma membrane(GO:0005886);cellular_component:integral component of plasma membrane(GO:0005887);biological_process:transport(GO:0006810);biological_process:glutamate receptor signaling pathway(GO:0007215);biological_process:synaptic transmission(GO:0007268);molecular_function:kainate selective gl…
ENSG00000197849	-3.07973	-2.59329	0.274957	1	OR8G1	K04257	molecular_function:G-protein coupled receptor activity(GO:0004930);molecular_function:olfactory receptor activity(GO:0004984);cellular_component:plasma membrane(GO:0005886);biological_process:sensory perception of smell(GO:0007608);cellular_component:integral component of membrane(GO:0016021);biological_process:detection of chemical stimulus involved in sensory perception of smell(GO:0050911)
ENSG00000120457	-3.07973	-2.59329	0.274957	1	KCNJ5	K04999	molecular_function:inward rectifier potassium channel activity(GO:0005242);molecular_function:protein binding(GO:0005515);cellular_component:plasma membrane(GO:0005886);biological_process:potassium ion transport(GO:0006813);biological_process:synaptic transmission(GO:0007268);cellular_component:voltage-gated potassium channel complex(GO:0008076);molecular_function:G-protein activated inward recti…
ENSG00000134917	-3.07973	-2.59329	0.274957	1	ADAMTS8	K08623	molecular_function:metalloendopeptidase activity(GO:0004222);molecular_function:integrin binding(GO:0005178);cellular_component:proteinaceous extracellular matrix(GO:0005578);biological_process:proteolysis(GO:0006508);molecular_function:heparin binding(GO:0008201);molecular_function:metallopeptidase activity(GO:0008237);molecular_function:zinc ion binding(GO:0008270);biological_process:negative r…
ENSG00000018236	-3.07973	-2.59329	0.274957	1	CNTN1	K06759	molecular_function:glycoprotein binding(GO:0001948);cellular_component:plasma membrane(GO:0005886);biological_process:cell adhesion(GO:0007155);biological_process:Notch signaling pathway(GO:0007219);biological_process:axon guidance(GO:0007411);biological_process:positive regulation of gene expression(GO:0010628);biological_process:positive regulation of sodium ion transport(GO:0010765);biological…
ENSG00000165966	-3.07973	-2.59329	0.274957	1	PDZRN4	K15682	molecular_function:ubiquitin-protein transferase activity(GO:0004842);molecular_function:zinc ion binding(GO:0008270)
ENSG00000184613	-3.07973	-2.59329	0.274957	1	NELL2	_	molecular_function:structural molecule activity(GO:0005198);molecular_function:calcium ion binding(GO:0005509);molecular_function:protein binding(GO:0005515);cellular_component:extracellular region(GO:0005576);biological_process:cell adhesion(GO:0007155)
ENSG00000257925	-3.07973	-2.59329	0.274957	1	RP11-493L12.3	_	_
ENSG00000167612	-3.07973	-2.59329	0.274957	1	ANKRD33	_	biological_process:skeletal muscle cell differentiation(GO:0035914)
ENSG00000238086	-3.07973	-2.59329	0.274957	1	PPP1R26P1	K17565	_
ENSG00000169488	-3.07973	-2.59329	0.274957	1	OR4K15	K04257	molecular_function:G-protein coupled receptor activity(GO:0004930);molecular_function:olfactory receptor activity(GO:0004984);cellular_component:plasma membrane(GO:0005886);cellular_component:integral component of membrane(GO:0016021)
ENSG00000129467	-3.07973	-2.59329	0.274957	1	ADCY4	K08044	molecular_function:nucleotide binding(GO:0000166);molecular_function:adenylate cyclase activity(GO:0004016);molecular_function:protein binding(GO:0005515);molecular_function:ATP binding(GO:0005524);cellular_component:intracellular(GO:0005622);cellular_component:cytoplasm(GO:0005737);cellular_component:plasma membrane(GO:0005886);biological_process:energy reserve metabolic process(GO:0006112);biol…
ENSG00000222990	-3.07973	-2.59329	0.274957	1	RNU4-22P	_	_
ENSG00000260211	-3.07973	-2.59329	0.274957	1	RP13-395E19.2	K04955	_
ENSG00000259500	-3.07973	-2.59329	0.274957	1	KRT8P24	K07605	_
ENSG00000259251	-3.07973	-2.59329	0.274957	1	RP11-643M14.1	_	_
ENSG00000157766	-3.07973	-2.59329	0.274957	1	ACAN	K06792	biological_process:skeletal system development(GO:0001501);biological_process:cartilage condensation(GO:0001502);biological_process:chondrocyte development(GO:0002063);molecular_function:extracellular matrix structural constituent(GO:0005201);molecular_function:calcium ion binding(GO:0005509);molecular_function:protein binding(GO:0005515);molecular_function:hyaluronic acid binding(GO:0005540);cel…
ENSG00000196557	-3.07973	-2.59329	0.274957	1	CACNA1H	K04855	molecular_function:ion channel activity(GO:0005216);cellular_component:voltage-gated calcium channel complex(GO:0005891);cellular_component:caveola(GO:0005901);biological_process:transport(GO:0006810);biological_process:muscle contraction(GO:0006936);biological_process:axon guidance(GO:0007411);biological_process:muscle organ development(GO:0007517);biological_process:myoblast fusion(GO:0007520);…
ENSG00000259926	-3.07973	-2.59329	0.274957	1	RP11-44F14.5	_	_
ENSG00000159708	-3.07973	-2.59329	0.274957	1	LRRC36	K16594	_
ENSG00000180068	-3.07973	-2.59329	0.274957	1	OR3A4P	K04257	molecular_function:G-protein coupled receptor activity(GO:0004930);molecular_function:olfactory receptor activity(GO:0004984);cellular_component:plasma membrane(GO:0005886);biological_process:sensory perception of smell(GO:0007608);cellular_component:integral component of membrane(GO:0016021);biological_process:detection of chemical stimulus involved in sensory perception of smell(GO:0050911)
ENSG00000252657	-3.07973	-2.59329	0.274957	1	SNORA70	_	_
ENSG00000141200	-3.07973	-2.59329	0.274957	1	KIF2B	K10393	biological_process:mitotic cell cycle(GO:0000278);cellular_component:condensed chromosome kinetochore(GO:0000777);molecular_function:microtubule motor activity(GO:0003777);molecular_function:ATP binding(GO:0005524);cellular_component:nucleus(GO:0005634);cellular_component:nucleolus(GO:0005730);cellular_component:microtubule organizing center(GO:0005815);cellular_component:spindle(GO:0005819);cell…
ENSG00000267530	-3.07973	-2.59329	0.274957	1	AC006273.5	_	_
ENSG00000212576	-3.07973	-2.59329	0.274957	1	RNA5SP467	_	_
ENSG00000186526	-3.07973	-2.59329	0.274957	1	CYP4F8	_	molecular_function:iron ion binding(GO:0005506);cellular_component:endoplasmic reticulum membrane(GO:0005789);biological_process:icosanoid metabolic process(GO:0006690);biological_process:prostaglandin metabolic process(GO:0006693);biological_process:xenobiotic metabolic process(GO:0006805);molecular_function:electron carrier activity(GO:0009055);cellular_component:integral component of membrane(…
ENSG00000198521	-3.07973	-2.59329	0.274957	1	ZNF43	K09228	molecular_function:nucleic acid binding(GO:0003676);molecular_function:DNA binding(GO:0003677);cellular_component:intracellular(GO:0005622);cellular_component:nucleus(GO:0005634);biological_process:transcription, DNA-templated(GO:0006351);biological_process:regulation of transcription, DNA-templated(GO:0006355);molecular_function:metal ion binding(GO:0046872)
ENSG00000127903	-3.07973	-2.59329	0.274957	1	ZNF835	_	molecular_function:DNA binding(GO:0003677);cellular_component:nucleus(GO:0005634);biological_process:transcription, DNA-templated(GO:0006351);biological_process:regulation of transcription, DNA-templated(GO:0006355);molecular_function:metal ion binding(GO:0046872)
ENSG00000115705	-3.07973	-2.59329	0.274957	1	TPO	K00431	molecular_function:iodide peroxidase activity(GO:0004447);molecular_function:peroxidase activity(GO:0004601);molecular_function:calcium ion binding(GO:0005509);cellular_component:mitochondrion(GO:0005739);cellular_component:plasma membrane(GO:0005886);cellular_component:integral component of plasma membrane(GO:0005887);biological_process:thyroid hormone generation(GO:0006590);biological_process:r…
ENSG00000169618	-3.07973	-2.59329	0.274957	1	PROKR1	K08379	molecular_function:neuropeptide Y receptor activity(GO:0004983);cellular_component:plasma membrane(GO:0005886);cellular_component:integral component of membrane(GO:0016021);biological_process:negative regulation of apoptotic process(GO:0043066)
ENSG00000204872	-3.07973	-2.59329	0.274957	1	AC092653.5	_	_
ENSG00000243264	-3.07973	-2.59329	0.274957	1	IGKV2D-29	_	_
ENSG00000175497	-3.07973	-2.59329	0.274957	1	DPP10	_	biological_process:proteolysis(GO:0006508);molecular_function:serine-type peptidase activity(GO:0008236);molecular_function:dipeptidyl-peptidase activity(GO:0008239);cellular_component:membrane(GO:0016020);cellular_component:integral component of membrane(GO:0016021)
ENSG00000178171	-3.07973	-2.59329	0.274957	1	AMER3	K04372	cellular_component:plasma membrane(GO:0005886);molecular_function:lipid binding(GO:0008289);biological_process:Wnt signaling pathway(GO:0016055)
ENSG00000169507	-3.07973	-2.59329	0.274957	1	SLC38A11	K14997	biological_process:sodium ion transport(GO:0006814);biological_process:amino acid transport(GO:0006865);cellular_component:integral component of membrane(GO:0016021)
ENSG00000169432	-3.07973	-2.59329	0.274957	1	SCN9A	K04841	cellular_component:voltage-gated sodium channel complex(GO:0001518);molecular_function:ion channel activity(GO:0005216);molecular_function:voltage-gated sodium channel activity(GO:0005248);biological_process:sodium ion transport(GO:0006814);biological_process:inflammatory response(GO:0006954);biological_process:response to toxic substance(GO:0009636);biological_process:post-embryonic development(…
ENSG00000101327	-3.07973	-2.59329	0.274957	1	PDYN	K15840	molecular_function:opioid peptide activity(GO:0001515);cellular_component:extracellular region(GO:0005576);cellular_component:plasma membrane(GO:0005886);biological_process:neuropeptide signaling pathway(GO:0007218);biological_process:synaptic transmission(GO:0007268);biological_process:cell death(GO:0008219)
ENSG00000125813	-3.07973	-2.59329	0.274957	1	PAX1	K09382	biological_process:skeletal system development(GO:0001501);biological_process:somitogenesis(GO:0001756);molecular_function:DNA binding(GO:0003677);cellular_component:nucleus(GO:0005634);biological_process:transcription from RNA polymerase II promoter(GO:0006366);biological_process:cell proliferation(GO:0008283);biological_process:CD4-positive, alpha-beta T cell differentiation(GO:0043367);biologi…
ENSG00000232855	-3.07973	-2.59329	0.274957	1	AF131217.1	_	_
ENSG00000198445	-3.07973	-2.59329	0.274957	1	CCT8L2	K09500	molecular_function:anion channel activity(GO:0005253);molecular_function:ATP binding(GO:0005524);cellular_component:cytoplasm(GO:0005737);biological_process:transport(GO:0006810);molecular_function:calcium-activated potassium channel activity(GO:0015269);biological_process:cellular protein metabolic process(GO:0044267)
ENSG00000144619	-3.07973	-2.59329	0.274957	1	CNTN4	K06762	cellular_component:extracellular region(GO:0005576);cellular_component:plasma membrane(GO:0005886);biological_process:neuron cell-cell adhesion(GO:0007158);biological_process:nervous system development(GO:0007399);biological_process:axonogenesis(GO:0007409);biological_process:axon guidance(GO:0007411);biological_process:axonal fasciculation(GO:0007413);biological_process:brain development(GO:0007…
ENSG00000238267	-3.07973	-2.59329	0.274957	1	RP11-241K18.2	K11508	_
ENSG00000177494	-3.07973	-2.59329	0.274957	1	ZBED2	K06517	molecular_function:DNA binding(GO:0003677);molecular_function:metal ion binding(GO:0046872)
ENSG00000114013	-3.07973	-2.59329	0.274957	1	CD86	K05413	biological_process:toll-like receptor signaling pathway(GO:0002224);molecular_function:receptor activity(GO:0004872);molecular_function:protein binding(GO:0005515);cellular_component:plasma membrane(GO:0005886);biological_process:immune response(GO:0006955);biological_process:epidermal growth factor receptor signaling pathway(GO:0007173);biological_process:cell-cell signaling(GO:0007267);biologic…
ENSG00000241929	-3.07973	-2.59329	0.274957	1	RP11-278L15.3	_	_
ENSG00000090402	-3.07973	-2.59329	0.274957	1	SI	K01203	molecular_function:hydrolase activity, hydrolyzing O-glycosyl compounds(GO:0004553);molecular_function:alpha-1,4-glucosidase activity(GO:0004558);molecular_function:oligo-1,6-glucosidase activity(GO:0004574);molecular_function:sucrose alpha-glucosidase activity(GO:0004575);cellular_component:Golgi apparatus(GO:0005794);cellular_component:plasma membrane(GO:0005886);cellular_component:brush border…
ENSG00000121853	-3.07973	-2.59329	0.274957	1	GHSR	K04284	molecular_function:growth hormone secretagogue receptor activity(GO:0001616);molecular_function:G-protein coupled receptor activity(GO:0004930);cellular_component:plasma membrane(GO:0005886);biological_process:G-protein coupled receptor signaling pathway(GO:0007186);biological_process:actin polymerization or depolymerization(GO:0008154);biological_process:adult feeding behavior(GO:0008343);biolog…
ENSG00000127241	-3.07973	-2.59329	0.274957	1	MASP1	K03992	biological_process:complement activation, lectin pathway(GO:0001867);molecular_function:serine-type endopeptidase activity(GO:0004252);molecular_function:calcium ion binding(GO:0005509);molecular_function:protein binding(GO:0005515);cellular_component:extracellular region(GO:0005576);cellular_component:extracellular space(GO:0005615);biological_process:proteolysis(GO:0006508);biological_process:c…
ENSG00000151834	-3.07973	-2.59329	0.274957	1	GABRA2	K05175	biological_process:regulation of neurotransmitter levels(GO:0001505);molecular_function:GABA-A receptor activity(GO:0004890);molecular_function:extracellular ligand-gated ion channel activity(GO:0005230);molecular_function:chloride channel activity(GO:0005254);cellular_component:plasma membrane(GO:0005886);biological_process:ion transport(GO:0006811);biological_process:chloride transport(GO:00068…
ENSG00000180613	-3.07973	-2.59329	0.274957	1	GSX2	K09310	biological_process:regulation of respiratory gaseous exchange by neurological system process(GO:0002087);molecular_function:sequence-specific DNA binding transcription factor activity(GO:0003700);cellular_component:nucleus(GO:0005634);biological_process:transcription, DNA-templated(GO:0006351);biological_process:spinal cord association neuron differentiation(GO:0021527);biological_process:hindbra…
ENSG00000196616	-3.07973	-2.59329	0.274957	1	ADH1B	K13951	molecular_function:alcohol dehydrogenase activity, zinc-dependent(GO:0004024);cellular_component:cytosol(GO:0005829);biological_process:ethanol oxidation(GO:0006069);biological_process:xenobiotic metabolic process(GO:0006805);molecular_function:zinc ion binding(GO:0008270);molecular_function:oxidoreductase activity(GO:0016491);biological_process:small molecule metabolic process(GO:0044281)
ENSG00000178403	-3.07973	-2.59329	0.274957	1	NEUROG2	K09082	biological_process:neuron migration(GO:0001764);cellular_component:nucleus(GO:0005634);biological_process:transcription, DNA-templated(GO:0006351);biological_process:axon guidance(GO:0007411);biological_process:central nervous system neuron development(GO:0021954);biological_process:forebrain development(GO:0030900);molecular_function:sequence-specific DNA binding(GO:0043565);biological_process:c…
ENSG00000249509	-3.07973	-2.59329	0.274957	1	RP11-402J6.1	_	_
ENSG00000138653	-3.07973	-2.59329	0.274957	1	NDST4	K02579	cellular_component:Golgi membrane(GO:0000139);biological_process:heparan sulfate proteoglycan biosynthetic process(GO:0015012);molecular_function:[heparan sulfate]-glucosamine N-sulfotransferase activity(GO:0015016);cellular_component:integral component of membrane(GO:0016021);molecular_function:hydrolase activity(GO:0016787);molecular_function:deacetylase activity(GO:0019213);biological_process:…
ENSG00000171509	-3.07973	-2.59329	0.274957	1	RXFP1	K04306	molecular_function:G-protein coupled receptor activity(GO:0004930);cellular_component:plasma membrane(GO:0005886);biological_process:adenylate cyclase-modulating G-protein coupled receptor signaling pathway(GO:0007188);biological_process:parturition(GO:0007567);cellular_component:integral component of membrane(GO:0016021);biological_process:cell differentiation(GO:0030154);biological_process:extr…
ENSG00000069018	-3.07973	-2.59329	0.274957	1	TRPC7	_	molecular_function:calcium channel activity(GO:0005262);molecular_function:protein binding(GO:0005515);cellular_component:nuclear envelope(GO:0005635);cellular_component:plasma membrane(GO:0005886);biological_process:manganese ion transport(GO:0006828);biological_process:axon guidance(GO:0007411);biological_process:blood coagulation(GO:0007596);cellular_component:integral component of membrane(GO…
ENSG00000243232	-3.07973	-2.59329	0.274957	1	PCDHAC2	K16493	molecular_function:calcium ion binding(GO:0005509);cellular_component:integral component of plasma membrane(GO:0005887);biological_process:cell adhesion(GO:0007155);biological_process:homophilic cell adhesion via plasma membrane adhesion molecules(GO:0007156);biological_process:nervous system development(GO:0007399)
ENSG00000248626	-3.07973	-2.59329	0.274957	1	GAPDHP40	K00134	_
ENSG00000145864	-3.07973	-2.59329	0.274957	1	GABRB2	_	molecular_function:GABA-A receptor activity(GO:0004890);molecular_function:extracellular ligand-gated ion channel activity(GO:0005230);molecular_function:inhibitory extracellular ligand-gated ion channel activity(GO:0005237);molecular_function:chloride channel activity(GO:0005254);cellular_component:cytosol(GO:0005829);cellular_component:plasma membrane(GO:0005886);cellular_component:integral com…
ENSG00000254130	-3.07973	-2.59329	0.274957	1	CTB-7E3.1	_	_
ENSG00000234284	-3.07973	-2.59329	0.274957	1	ZNF879	K09228	molecular_function:nucleic acid binding(GO:0003676);molecular_function:DNA binding(GO:0003677);cellular_component:intracellular(GO:0005622);cellular_component:nucleus(GO:0005634);biological_process:transcription, DNA-templated(GO:0006351);biological_process:regulation of transcription, DNA-templated(GO:0006355);molecular_function:metal ion binding(GO:0046872)
ENSG00000219712	-3.07973	-2.59329	0.274957	1	RP11-532F6.2	_	_
ENSG00000079689	-3.07973	-2.59329	0.274957	1	SCGN	_	molecular_function:calcium ion binding(GO:0005509);cellular_component:extracellular region(GO:0005576);cellular_component:cytoplasm(GO:0005737);biological_process:biological_process(GO:0008150);cellular_component:transport vesicle membrane(GO:0030658)
ENSG00000187987	-3.07973	-2.59329	0.274957	1	ZSCAN23	K09230	molecular_function:DNA binding(GO:0003677);molecular_function:sequence-specific DNA binding transcription factor activity(GO:0003700);cellular_component:nucleus(GO:0005634);biological_process:transcription, DNA-templated(GO:0006351);molecular_function:metal ion binding(GO:0046872)
ENSG00000146216	-3.07973	-2.59329	0.274957	1	TTBK1	K08815	molecular_function:protein serine/threonine kinase activity(GO:0004674);molecular_function:ATP binding(GO:0005524);cellular_component:nucleus(GO:0005634);cellular_component:cytoplasm(GO:0005737);cellular_component:cell junction(GO:0030054)
ENSG00000172348	-3.07973	-2.59329	0.274957	1	RCAN2	K17903	molecular_function:nucleotide binding(GO:0000166);cellular_component:cellular_component(GO:0005575);biological_process:central nervous system development(GO:0007417);biological_process:calcium-mediated signaling(GO:0019722);molecular_function:protein phosphatase 2B binding(GO:0030346)
ENSG00000146147	-3.07973	-2.59329	0.274957	1	MLIP	_	cellular_component:nuclear envelope(GO:0005635);cellular_component:PML body(GO:0016605);cellular_component:nuclear lumen(GO:0031981)
ENSG00000216809	-3.07973	-2.59329	0.274957	1	RP11-57K17.1	K14805	_
ENSG00000118526	-3.07973	-2.59329	0.274957	1	TCF21	K09072	biological_process:negative regulation of transcription from RNA polymerase II promoter(GO:0000122);molecular_function:RNA polymerase II core promoter proximal region sequence-specific DNA binding transcription factor activity involved in positive regulation of transcription(GO:0001077);molecular_function:RNA polymerase II core promoter proximal region sequence-specific DNA binding transcription …
ENSG00000203690	-3.07973	-2.59329	0.274957	1	TCP10	_	cellular_component:cytosol(GO:0005829)
ENSG00000198286	-3.07973	-2.59329	0.274957	1	CARD11	K07367	biological_process:positive regulation of cytokine production(GO:0001819);molecular_function:guanylate kinase activity(GO:0004385);molecular_function:protein binding(GO:0005515);cellular_component:intracellular(GO:0005622);cellular_component:cytoplasm(GO:0005737);cellular_component:cytosol(GO:0005829);cellular_component:plasma membrane(GO:0005886);biological_process:signal transduction(GO:0007165…
ENSG00000238781	-3.07973	-2.59329	0.274957	1	snoU13	_	_
ENSG00000225792	-3.07973	-2.59329	0.274957	1	AC004540.4	_	_
ENSG00000226102	-3.07973	-2.59329	0.274957	1	SEPT7P3	K16944	_
ENSG00000257138	-3.07973	-2.59329	0.274957	1	TAS2R38	K08474	molecular_function:G-protein coupled receptor activity(GO:0004930);cellular_component:plasma membrane(GO:0005886);cellular_component:integral component of membrane(GO:0016021);biological_process:sensory perception of taste(GO:0050909)
ENSG00000036448	-3.07973	-2.59329	0.274957	1	MYOM2	_	molecular_function:protein binding(GO:0005515);biological_process:muscle contraction(GO:0006936);molecular_function:structural constituent of muscle(GO:0008307);cellular_component:M band(GO:0031430);cellular_component:myosin filament(GO:0032982)
ENSG00000184608	-3.07973	-2.59329	0.274957	1	C8orf12	_	_
ENSG00000120907	-3.07973	-2.59329	0.274957	1	ADRA1A	K04135	biological_process:negative regulation of heart rate involved in baroreceptor response to increased systemic arterial blood pressure(GO:0001985);biological_process:norepinephrine-epinephrine vasoconstriction involved in regulation of systemic arterial blood pressure(GO:0001994);biological_process:positive regulation of heart rate by epinephrine-norepinephrine(GO:0001996);biological_process:positi…
ENSG00000215262	-3.07973	-2.59329	0.274957	1	KCNU1	K05274	molecular_function:ion channel activity(GO:0005216);molecular_function:voltage-gated potassium channel activity(GO:0005249);molecular_function:potassium channel activity(GO:0005267);cellular_component:plasma membrane(GO:0005886);biological_process:single fertilization(GO:0007338);cellular_component:voltage-gated potassium channel complex(GO:0008076);molecular_function:calcium-activated potassium …
ENSG00000147488	-3.07973	-2.59329	0.274957	1	ST18	_	molecular_function:DNA binding(GO:0003677);molecular_function:sequence-specific DNA binding transcription factor activity(GO:0003700);cellular_component:nucleus(GO:0005634);biological_process:transcription, DNA-templated(GO:0006351);molecular_function:zinc ion binding(GO:0008270)
ENSG00000224083	-3.07973	-2.59329	0.274957	1	RP11-39K24.4	K02256	_
ENSG00000175164	-3.07973	-2.59329	0.274957	1	ABO	_	molecular_function:glycoprotein-fucosylgalactoside alpha-N-acetylgalactosaminyltransferase activity(GO:0004380);molecular_function:fucosylgalactoside 3-alpha-galactosyltransferase activity(GO:0004381);cellular_component:extracellular region(GO:0005576);biological_process:protein glycosylation(GO:0006486);cellular_component:integral component of Golgi membrane(GO:0030173);cellular_component:Golgi …
ENSG00000072133	-3.07973	-2.59329	0.274957	1	RPS6KA6	K04373	molecular_function:magnesium ion binding(GO:0000287);molecular_function:protein kinase activity(GO:0004672);molecular_function:protein serine/threonine kinase activity(GO:0004674);molecular_function:ATP binding(GO:0005524);cellular_component:nucleoplasm(GO:0005654);cellular_component:cytosol(GO:0005829);biological_process:DNA damage response, signal transduction by p53 class mediator resulting in…
ENSG00000179542	-3.07973	-2.59329	0.274957	1	SLITRK4	_	biological_process:axonogenesis(GO:0007409);cellular_component:integral component of membrane(GO:0016021)
ENSG00000162711	-3.07825	-2.59331	0.274957	1	NLRP3	K12800	biological_process:negative regulation of acute inflammatory response(GO:0002674);molecular_function:protein binding(GO:0005515);molecular_function:ATP binding(GO:0005524);cellular_component:cytoplasm(GO:0005737);cellular_component:cytosol(GO:0005829);;biological_process:activation of cysteine-type endopeptidase activity involved in apoptotic process(GO:0006919);biological_process:defense respons…
ENSG00000251989	-3.07825	-2.59331	0.274957	1	AL160011.1	_	_
ENSG00000170683	-3.07825	-2.59331	0.274957	1	OR10A3	K04257	molecular_function:G-protein coupled receptor activity(GO:0004930);molecular_function:olfactory receptor activity(GO:0004984);cellular_component:plasma membrane(GO:0005886);biological_process:sensory perception of smell(GO:0007608);cellular_component:integral component of membrane(GO:0016021);biological_process:detection of chemical stimulus involved in sensory perception of smell(GO:0050911)
ENSG00000256101	-3.07825	-2.59331	0.274957	1	RP11-90D4.3	_	_
ENSG00000214772	-3.07825	-2.59331	0.274957	1	RP11-174G6.1	_	_
ENSG00000257940	-3.07825	-2.59331	0.274957	1	RP11-248E9.6	_	_
ENSG00000271336	-3.07825	-2.59331	0.274957	1	IGHD1OR15-1A	_	_
ENSG00000259710	-3.07825	-2.59331	0.274957	1	RP11-150L8.3	_	_
ENSG00000259395	-3.07825	-2.59331	0.274957	1	RP11-475A13.2	_	_
ENSG00000261788	-3.07825	-2.59331	0.274957	1	RP11-480G7.1	_	_
ENSG00000260345	-3.07825	-2.59331	0.274957	1	AC009052.12	_	_
ENSG00000243101	-3.07825	-2.59331	0.274957	1	RPS3P7	K02985	_
ENSG00000265069	-3.07825	-2.59331	0.274957	1	RP11-781P6.1	_	_
ENSG00000260372	-3.07825	-2.59331	0.274957	1	AQP4-AS1	_	_
ENSG00000175489	-3.07825	-2.59331	0.274957	1	LRRC25	K17985	cellular_component:integral component of membrane(GO:0016021)
ENSG00000235914	-3.07825	-2.59331	0.274957	1	MACROD2-AS1	_	_
ENSG00000101448	-3.07825	-2.59331	0.274957	1	EPPIN	_	molecular_function:serine-type endopeptidase inhibitor activity(GO:0004867);molecular_function:protein binding(GO:0005515);cellular_component:extracellular region(GO:0005576);cellular_component:cell surface(GO:0009986);biological_process:negative regulation of peptidase activity(GO:0010466);molecular_function:peptidase inhibitor activity(GO:0030414);biological_process:defense response to bacteriu…
ENSG00000200361	-3.07825	-2.59331	0.274957	1	Y_RNA	_	_
ENSG00000223715	-3.07825	-2.59331	0.274957	1	RP11-71G7.1	_	_
ENSG00000240966	-3.07825	-2.59331	0.274957	1	RN7SL681P	_	_
ENSG00000249639	-3.07825	-2.59331	0.274957	1	CTB-138E5.1	_	_
ENSG00000253966	-3.07825	-2.59331	0.274957	1	CTC-455F18.3	K10391	_
ENSG00000230626	-3.07825	-2.59331	0.274957	1	RP11-286H14.4	K04369	_
ENSG00000133561	-3.07825	-2.59331	0.274957	1	GIMAP6	_	molecular_function:GTP binding(GO:0005525);cellular_component:cytosol(GO:0005829)
ENSG00000253302	-3.07825	-2.59331	0.274957	1	STAU2-AS1	_	_
ENSG00000228039	-3.07496	-2.59334	0.269955	1	KB-1125A3.10	K00799	_
ENSG00000121075	-3.07496	-2.59334	0.269952	1	TBX4	K10178	biological_process:angiogenesis(GO:0001525);biological_process:morphogenesis of an epithelium(GO:0002009);molecular_function:DNA binding(GO:0003677);molecular_function:sequence-specific DNA binding transcription factor activity(GO:0003700);cellular_component:nucleus(GO:0005634);biological_process:transcription, DNA-templated(GO:0006351);biological_process:regulation of transcription, DNA-template…
ENSG00000251939	-3.07496	-2.59334	0.269947	1	RNU6-1278P	_	_
ENSG00000221039	-3.07496	-2.59334	0.269947	1	MIR1286	_	_
ENSG00000225157	-3.07496	-2.59334	0.269943	1	AC005779.1	K13194	_
ENSG00000163827	-3.07496	-2.59334	0.269941	1	LRRC2	K17985	_
ENSG00000167798	-3.07496	-2.59334	0.269941	1	C3P1	K03990	molecular_function:endopeptidase inhibitor activity(GO:0004866);cellular_component:extracellular space(GO:0005615)
ENSG00000232969	-3.07496	-2.59334	0.26994	1	AP001062.9	_	_
ENSG00000215148	-3.07496	-2.59334	0.269935	1	PRSS41	K09625	molecular_function:serine-type endopeptidase activity(GO:0004252);cellular_component:plasma membrane(GO:0005886);biological_process:proteolysis(GO:0006508);cellular_component:anchored component of membrane(GO:0031225);cellular_component:intracellular organelle(GO:0043229)
ENSG00000115488	-3.07496	-2.59334	0.269935	1	NEU2	K12357	molecular_function:catalytic activity(GO:0003824);cellular_component:cytoplasm(GO:0005737);cellular_component:cytosol(GO:0005829);biological_process:sphingolipid metabolic process(GO:0006665);biological_process:glycosphingolipid metabolic process(GO:0006687);biological_process:small molecule metabolic process(GO:0044281);molecular_function:exo-alpha-(2->3)-sialidase activity(GO:0052794);molecular…
ENSG00000269923	-3.07496	-2.59334	0.269934	1	RP11-214K3.24	_	_
ENSG00000125430	-3.07496	-2.59334	0.269933	1	HS3ST3B1	K07809	cellular_component:Golgi membrane(GO:0000139);cellular_component:integral component of plasma membrane(GO:0005887);biological_process:carbohydrate metabolic process(GO:0005975);biological_process:glycosaminoglycan biosynthetic process(GO:0006024);molecular_function:[heparan sulfate]-glucosamine 3-sulfotransferase 1 activity(GO:0008467);biological_process:heparan sulfate proteoglycan biosynthetic …
ENSG00000236409	-3.07496	-2.59334	0.269922	1	NRADDP	_	_
ENSG00000178175	-3.07496	-2.59334	0.2699	1	ZNF366	_	biological_process:negative regulation of transcription from RNA polymerase II promoter(GO:0000122);molecular_function:protein binding transcription factor activity(GO:0000988);molecular_function:DNA binding(GO:0003677);molecular_function:protein binding(GO:0005515);cellular_component:nucleus(GO:0005634);biological_process:transcription, DNA-templated(GO:0006351);molecular_function:estrogen recep…
ENSG00000177679	-3.07496	-2.59334	0.269898	1	SRRM3	_	_
ENSG00000170374	-3.07496	-2.59334	0.269889	1	SP7	K09197	biological_process:osteoblast differentiation(GO:0001649);molecular_function:DNA binding(GO:0003677);cellular_component:nucleus(GO:0005634);cellular_component:cytoplasm(GO:0005737);biological_process:transcription, DNA-templated(GO:0006351);biological_process:regulation of transcription from RNA polymerase II promoter(GO:0006357);molecular_function:DEAD/H-box RNA helicase binding(GO:0017151);biol…
ENSG00000255122	-3.07496	-2.59334	0.269889	1	RP11-303G3.6	_	_
ENSG00000105967	-3.07495	-2.59334	0.269883	1	TFEC	_	molecular_function:DNA binding(GO:0003677);molecular_function:sequence-specific DNA binding transcription factor activity(GO:0003700);molecular_function:transcription coactivator activity(GO:0003713);molecular_function:transcription corepressor activity(GO:0003714);cellular_component:nucleus(GO:0005634);biological_process:transcription, DNA-templated(GO:0006351);biological_process:regulation of t…
ENSG00000106018	-3.07495	-2.59334	0.269874	1	VIPR2	K04590	molecular_function:G-protein coupled receptor activity(GO:0004930);molecular_function:vasoactive intestinal polypeptide receptor activity(GO:0004999);cellular_component:plasma membrane(GO:0005886);cellular_component:integral component of plasma membrane(GO:0005887);biological_process:signal transduction(GO:0007165);biological_process:activation of adenylate cyclase activity(GO:0007190);biological…
ENSG00000199038	-3.07495	-2.59334	0.26987	1	MIR210	_	_
ENSG00000256870	-3.07495	-2.59334	0.269868	1	SLC5A8	K14388	cellular_component:plasma membrane(GO:0005886);biological_process:ion transport(GO:0006811);biological_process:sodium ion transport(GO:0006814);biological_process:apoptotic process(GO:0006915);molecular_function:symporter activity(GO:0015293);cellular_component:integral component of membrane(GO:0016021);cellular_component:apical plasma membrane(GO:0016324);biological_process:transmembrane transpo…
ENSG00000241811	-3.07495	-2.59334	0.269867	1	RN7SL651P	_	_
ENSG00000202242	-3.07495	-2.59334	0.269863	1	RNU6-1276P	_	_
ENSG00000225531	-3.07495	-2.59334	0.269858	1	RP11-196I18.3	K08964	_
ENSG00000244081	-3.07495	-2.59334	0.269852	1	RP11-350D23.4	K12019	_
ENSG00000204381	-3.07495	-2.59334	0.269851	1	LAYN	K10077	cellular_component:ruffle(GO:0001726);molecular_function:hyaluronic acid binding(GO:0005540);cellular_component:focal adhesion(GO:0005925);cellular_component:cell surface(GO:0009986);cellular_component:integral component of membrane(GO:0016021);molecular_function:carbohydrate binding(GO:0030246)
ENSG00000272921	-3.07495	-2.59334	0.269849	1	RP11-500M8.7	K03953	_
ENSG00000238444	-3.07495	-2.59334	0.269845	1	RNU6-893P	_	_
ENSG00000162723	-3.07495	-2.59334	0.269789	1	SLAMF9	_	molecular_function:receptor activity(GO:0004872);cellular_component:integral component of membrane(GO:0016021)
ENSG00000158473	-3.07495	-2.59334	0.269787	1	CD1D	K06448	molecular_function:receptor activity(GO:0004872);cellular_component:cytoplasm(GO:0005737);cellular_component:lysosomal membrane(GO:0005765);cellular_component:integral component of plasma membrane(GO:0005887);cellular_component:cell surface(GO:0009986);cellular_component:endosome membrane(GO:0010008);biological_process:detection of bacterium(GO:0016045);biological_process:modulation by virus of h…
ENSG00000151892	-3.07495	-2.59334	0.269778	1	GFRA1	_	biological_process:kidney development(GO:0001822);molecular_function:receptor activity(GO:0004872);molecular_function:receptor binding(GO:0005102);molecular_function:integrin binding(GO:0005178);cellular_component:extracellular space(GO:0005615);biological_process:cell surface receptor signaling pathway(GO:0007166);biological_process:axon guidance(GO:0007411);biological_process:male gonad develop…
ENSG00000184185	-3.0708	-0.393211	1.35e-08	4.46e-07	KCNJ12	K19468	molecular_function:inward rectifier potassium channel activity(GO:0005242);cellular_component:plasma membrane(GO:0005886);biological_process:potassium ion transport(GO:0006813);biological_process:muscle contraction(GO:0006936);biological_process:synaptic transmission(GO:0007268);biological_process:regulation of heart contraction(GO:0008016);cellular_component:integral component of membrane(GO:001…
ENSG00000162624	-3.07052	-2.59339	0.274957	1	LHX8	K09375	molecular_function:sequence-specific DNA binding transcription factor activity(GO:0003700);cellular_component:nucleus(GO:0005634);biological_process:transcription, DNA-templated(GO:0006351);biological_process:learning or memory(GO:0007611);molecular_function:zinc ion binding(GO:0008270);biological_process:female gonad development(GO:0008585);biological_process:forebrain neuron development(GO:0021…
ENSG00000224535	-3.07052	-2.59339	0.274957	1	RP11-61J19.2	_	_
ENSG00000177791	-3.07052	-2.59339	0.274957	1	MYOZ1	_	molecular_function:protein binding(GO:0005515);cellular_component:nucleus(GO:0005634);cellular_component:actin cytoskeleton(GO:0015629);biological_process:myofibril assembly(GO:0030239);cellular_component:pseudopodium(GO:0031143);molecular_function:FATZ binding(GO:0051373)
ENSG00000270929	-3.07052	-2.59339	0.274957	1	SRD5A3P1	K12345	_
ENSG00000264978	-3.07052	-2.59339	0.274957	1	RN7SL630P	_	_
ENSG00000271424	-3.07052	-2.59339	0.274957	1	RP11-647O20.1	_	_
ENSG00000258767	-3.07052	-2.59339	0.274957	1	RP11-32B5.5	_	_
ENSG00000200070	-3.07052	-2.59339	0.274957	1	RNU4-80P	_	_
ENSG00000263033	-3.07052	-2.59339	0.274957	1	RP11-396B14.2	_	_
ENSG00000261336	-3.07052	-2.59339	0.274957	1	EIF4BP5	K03258	_
ENSG00000253058	-3.07052	-2.59339	0.274957	1	RNA5SP437	_	_
ENSG00000266155	-3.07052	-2.59339	0.274957	1	RP11-927P21.6	_	_
ENSG00000080511	-3.07052	-2.59339	0.274957	1	RDH8	K11150	biological_process:retinoid metabolic process(GO:0001523);molecular_function:estradiol 17-beta-dehydrogenase activity(GO:0004303);molecular_function:retinol dehydrogenase activity(GO:0004745);cellular_component:cytoplasm(GO:0005737);cellular_component:integral component of plasma membrane(GO:0005887);biological_process:steroid biosynthetic process(GO:0006694);biological_process:estrogen biosynthe…
ENSG00000230587	-3.07052	-2.59339	0.274957	1	AC093609.1	_	_
ENSG00000233671	-3.07052	-2.59339	0.274957	1	AC083899.1	K11506	_
ENSG00000124107	-3.07052	-2.59339	0.274957	1	SLPI	_	molecular_function:endopeptidase inhibitor activity(GO:0004866);molecular_function:serine-type endopeptidase inhibitor activity(GO:0004867);molecular_function:protein binding(GO:0005515);cellular_component:extracellular region(GO:0005576);biological_process:negative regulation of endopeptidase activity(GO:0010951);molecular_function:enzyme binding(GO:0019899);cellular_component:extracellular matr…
ENSG00000249112	-3.07052	-2.59339	0.274957	1	RP11-43D2.2	_	_
ENSG00000236714	-3.07052	-2.59339	0.274957	1	AC005592.1	_	_
ENSG00000204789	-3.07052	-2.59339	0.274957	1	ZNF204P	K09228	_
ENSG00000146666	-3.07052	-2.59339	0.274957	1	LINC00525	_	_
ENSG00000273011	-3.07052	-2.59339	0.274957	1	RP11-728K20.3	_	_
ENSG00000223220	-3.07052	-2.59339	0.274957	1	Y_RNA	_	_
ENSG00000069812	-3.06741	-2.59342	0.274957	1	HES2	K09087	molecular_function:double-stranded DNA binding(GO:0003690);cellular_component:nucleus(GO:0005634);biological_process:transcription, DNA-templated(GO:0006351);molecular_function:transcription factor binding(GO:0008134);biological_process:negative regulation of transcription, DNA-templated(GO:0045892);molecular_function:protein dimerization activity(GO:0046983)
ENSG00000271989	-3.06741	-2.59342	0.274957	1	RP4-736L20.3	_	_
ENSG00000174950	-3.06741	-2.59342	0.274957	1	CD164L2	K10104	cellular_component:integral component of membrane(GO:0016021)
ENSG00000162373	-3.06741	-2.59342	0.274957	1	BEND5	_	cellular_component:Golgi apparatus(GO:0005794)
ENSG00000143536	-3.06741	-2.59342	0.274957	1	CRNN	_	molecular_function:calcium ion binding(GO:0005509);cellular_component:cytoplasm(GO:0005737);biological_process:response to heat(GO:0009408);cellular_component:membrane(GO:0016020);biological_process:single organismal cell-cell adhesion(GO:0016337)
ENSG00000132704	-3.06741	-2.59342	0.274957	1	FCRL2	K17985	molecular_function:SH3/SH2 adaptor activity(GO:0005070);cellular_component:plasma membrane(GO:0005886);biological_process:cell-cell signaling(GO:0007267);cellular_component:integral component of membrane(GO:0016021)
ENSG00000179639	-3.06741	-2.59342	0.274957	1	FCER1A	K08089	biological_process:positive regulation of type I hypersensitivity(GO:0001812);biological_process:serotonin secretion(GO:0001820);cellular_component:plasma membrane(GO:0005886);cellular_component:integral component of plasma membrane(GO:0005887);biological_process:activation of JUN kinase activity(GO:0007257);cellular_component:external side of plasma membrane(GO:0009897);biological_process:leukot…
ENSG00000158764	-3.06741	-2.59342	0.274957	1	ITLN2	K17527	cellular_component:extracellular region(GO:0005576)
ENSG00000081277	-3.06741	-2.59342	0.274957	1	PKP1	K10387	molecular_function:signal transducer activity(GO:0004871);molecular_function:protein binding(GO:0005515);molecular_function:lamin binding(GO:0005521);cellular_component:nucleus(GO:0005634);cellular_component:nucleolus(GO:0005730);cellular_component:intermediate filament(GO:0005882);cellular_component:plasma membrane(GO:0005886);biological_process:apoptotic process(GO:0006915);biological_process:c…
ENSG00000240710	-3.06741	-2.59342	0.274957	1	RP11-430C7.4	_	_
ENSG00000197617	-3.06741	-2.59342	0.274957	1	VN1R5	K04614	cellular_component:plasma membrane(GO:0005886);cellular_component:integral component of membrane(GO:0016021);molecular_function:pheromone receptor activity(GO:0016503);biological_process:response to pheromone(GO:0019236)
ENSG00000198128	-3.06741	-2.59342	0.274957	1	OR2L3	K04257	molecular_function:molecular_function(GO:0003674);molecular_function:G-protein coupled receptor activity(GO:0004930);molecular_function:olfactory receptor activity(GO:0004984);cellular_component:plasma membrane(GO:0005886);biological_process:biological_process(GO:0008150);cellular_component:integral component of membrane(GO:0016021)
ENSG00000183130	-3.06741	-2.59342	0.274957	1	OR2T11	K04257	molecular_function:G-protein coupled receptor activity(GO:0004930);molecular_function:olfactory receptor activity(GO:0004984);cellular_component:plasma membrane(GO:0005886);cellular_component:integral component of membrane(GO:0016021)
ENSG00000136750	-3.06741	-2.59342	0.274957	1	GAD2	K01580	cellular_component:Golgi membrane(GO:0000139);molecular_function:glutamate decarboxylase activity(GO:0004351);molecular_function:protein binding(GO:0005515);cellular_component:cytosol(GO:0005829);cellular_component:plasma membrane(GO:0005886);biological_process:glutamate decarboxylation to succinate(GO:0006540);biological_process:synaptic transmission(GO:0007268);biological_process:neurotransmitt…
ENSG00000107623	-3.06741	-2.59342	0.274957	1	GDF10	K05496	biological_process:skeletal system development(GO:0001501);molecular_function:cytokine activity(GO:0005125);cellular_component:extracellular space(GO:0005615);biological_process:transforming growth factor beta receptor signaling pathway(GO:0007179);molecular_function:growth factor activity(GO:0008083);biological_process:growth(GO:0040007)
ENSG00000156574	-3.06741	-2.59342	0.274957	1	NODAL	K04666	biological_process:negative regulation of transcription from RNA polymerase II promoter(GO:0000122);biological_process:trophectodermal cellular morphogenesis(GO:0001831);biological_process:neural fold formation(GO:0001842);biological_process:liver development(GO:0001889);biological_process:placenta development(GO:0001890);biological_process:embryonic placenta development(GO:0001892);biological_pr…
ENSG00000075891	-3.06741	-2.59342	0.274957	1	PAX2	K15608	biological_process:negative regulation of transcription from RNA polymerase II promoter(GO:0000122);molecular_function:core promoter proximal region sequence-specific DNA binding(GO:0000987);biological_process:urogenital system development(GO:0001655);biological_process:branching involved in ureteric bud morphogenesis(GO:0001658);biological_process:cell fate determination(GO:0001709);biological_p…
ENSG00000176769	-3.06741	-2.59342	0.274957	1	TCERG1L	_	_
ENSG00000006611	-3.06741	-2.59342	0.274957	1	USH1C	_	biological_process:G2/M transition of mitotic cell cycle(GO:0000086);cellular_component:photoreceptor outer segment(GO:0001750);cellular_component:photoreceptor inner segment(GO:0001917);molecular_function:protein binding(GO:0005515);cellular_component:cytoplasm(GO:0005737);cellular_component:cytosol(GO:0005829);cellular_component:cytoskeleton(GO:0005856);cellular_component:plasma membrane(GO:000…
ENSG00000066382	-3.06741	-2.59342	0.274957	1	MPPED2	_	biological_process:nervous system development(GO:0007399);molecular_function:hydrolase activity(GO:0016787);molecular_function:metal ion binding(GO:0046872)
ENSG00000156575	-3.06741	-2.59342	0.274957	1	PRG3	_	biological_process:histamine biosynthetic process(GO:0001694);biological_process:immune response(GO:0006955);biological_process:negative regulation of translation(GO:0017148);biological_process:leukotriene biosynthetic process(GO:0019370);molecular_function:carbohydrate binding(GO:0030246);biological_process:neutrophil activation(GO:0042119);biological_process:superoxide anion generation(GO:00425…
ENSG00000166927	-3.06741	-2.59342	0.274957	1	MS4A7	_	cellular_component:integral component of membrane(GO:0016021)
ENSG00000166391	-3.06741	-2.59342	0.274957	1	MOGAT2	K14457	molecular_function:2-acylglycerol O-acyltransferase activity(GO:0003846);cellular_component:endoplasmic reticulum(GO:0005783);cellular_component:endoplasmic reticulum membrane(GO:0005789);biological_process:glycerol metabolic process(GO:0006071);biological_process:diacylglycerol biosynthetic process(GO:0006651);cellular_component:integral component of membrane(GO:0016021);molecular_function:acety…
ENSG00000254479	-3.06741	-2.59342	0.274957	1	SLC25A1P1	K15100	_
ENSG00000082175	-3.06741	-2.59342	0.274957	1	PGR	K08556	biological_process:ovulation from ovarian follicle(GO:0001542);biological_process:epithelial cell maturation(GO:0002070);molecular_function:DNA binding(GO:0003677);molecular_function:steroid hormone receptor activity(GO:0003707);molecular_function:ligand-activated sequence-specific DNA binding RNA polymerase II transcription factor activity(GO:0004879);molecular_function:receptor binding(GO:00051…
ENSG00000109956	-3.06741	-2.59342	0.274957	1	B3GAT1	K00735	cellular_component:Golgi membrane(GO:0000139);biological_process:carbohydrate metabolic process(GO:0005975);biological_process:protein glycosylation(GO:0006486);molecular_function:UDP-galactose:beta-N-acetylglucosamine beta-1,3-galactosyltransferase activity(GO:0008499);molecular_function:galactosylgalactosylxylosylprotein 3-beta-glucuronosyltransferase activity(GO:0015018);cellular_component:mem…
ENSG00000205846	-3.06741	-2.59342	0.274957	1	CLEC6A	K17514	cellular_component:integral component of membrane(GO:0016021);molecular_function:carbohydrate binding(GO:0030246);biological_process:positive regulation of I-kappaB kinase/NF-kappaB signaling(GO:0043123);biological_process:innate immune response(GO:0045087);biological_process:positive regulation of cytokine secretion(GO:0050715);biological_process:defense response to fungus(GO:0050832)
ENSG00000172322	-3.06741	-2.59342	0.274957	1	CLEC12A	K17516	cellular_component:plasma membrane(GO:0005886);cellular_component:integral component of membrane(GO:0016021);molecular_function:carbohydrate binding(GO:0030246)
ENSG00000188991	-3.06741	-2.59342	0.274957	1	SLC15A5	K14639	biological_process:protein transport(GO:0015031);molecular_function:symporter activity(GO:0015293);biological_process:peptide transport(GO:0015833);cellular_component:integral component of membrane(GO:0016021)
ENSG00000239033	-3.06741	-2.59342	0.274957	1	snoU13	_	_
ENSG00000257137	-3.06741	-2.59342	0.274957	1	C12orf80	_	_
ENSG00000161850	-3.06741	-2.59342	0.274957	1	KRT82	K07605	cellular_component:cellular_component(GO:0005575);biological_process:biological_process(GO:0008150);molecular_function:structural constituent of epidermis(GO:0030280);cellular_component:keratin filament(GO:0045095)
ENSG00000139547	-3.06741	-2.59342	0.274957	1	RDH16	K11154	molecular_function:retinol dehydrogenase activity(GO:0004745);cellular_component:endoplasmic reticulum membrane(GO:0005789);biological_process:lipid metabolic process(GO:0006629);molecular_function:electron carrier activity(GO:0009055);cellular_component:integral component of membrane(GO:0016021);cellular_component:intracellular membrane-bounded organelle(GO:0043231)
ENSG00000139445	-3.06741	-2.59342	0.274957	1	FOXN4	K09407	molecular_function:double-stranded DNA binding(GO:0003690);molecular_function:RNA polymerase II distal enhancer sequence-specific DNA binding transcription factor activity(GO:0003705);cellular_component:nucleus(GO:0005634);cellular_component:transcription factor complex(GO:0005667);biological_process:pattern specification process(GO:0007389);biological_process:regulation of heart contraction(GO:0…
ENSG00000265603	-3.06741	-2.59342	0.274957	1	RN7SL133P	_	_
ENSG00000133116	-3.06741	-2.59342	0.274957	1	KL	K14756	biological_process:acute inflammatory response(GO:0002526);molecular_function:hydrolase activity, hydrolyzing O-glycosyl compounds(GO:0004553);molecular_function:beta-glucuronidase activity(GO:0004566);molecular_function:signal transducer activity(GO:0004871);molecular_function:fibroblast growth factor receptor binding(GO:0005104);molecular_function:hormone activity(GO:0005179);molecular_function…
ENSG00000165762	-3.06741	-2.59342	0.274957	1	OR4K2	K04257	molecular_function:G-protein coupled receptor activity(GO:0004930);molecular_function:olfactory receptor activity(GO:0004984);cellular_component:plasma membrane(GO:0005886);cellular_component:integral component of membrane(GO:0016021)
ENSG00000259078	-3.06741	-2.59342	0.274957	1	PTBP1P	K13218	_
ENSG00000186910	-3.06741	-2.59342	0.274957	1	SERPINA11	K04525	molecular_function:serine-type endopeptidase inhibitor activity(GO:0004867);cellular_component:extracellular region(GO:0005576);biological_process:negative regulation of endopeptidase activity(GO:0010951);biological_process:regulation of proteolysis(GO:0030162)
ENSG00000258581	-3.06741	-2.59342	0.274957	1	RP11-638I2.10	K03959	_
ENSG00000185559	-3.06741	-2.59342	0.274957	1	DLK1	_	molecular_function:molecular_function(GO:0003674);cellular_component:extracellular space(GO:0005615);biological_process:Notch signaling pathway(GO:0007219);biological_process:multicellular organismal development(GO:0007275);biological_process:post-embryonic development(GO:0009791);cellular_component:external side of plasma membrane(GO:0009897);cellular_component:integral component of membrane(GO:…
ENSG00000185823	-3.06741	-2.59342	0.274957	1	NPAP1	K01368	molecular_function:molecular_function(GO:0003674);cellular_component:cellular_component(GO:0005575);cellular_component:nuclear inner membrane(GO:0005637);cellular_component:nucleoplasm(GO:0005654);biological_process:multicellular organismal development(GO:0007275);biological_process:spermatogenesis(GO:0007283);biological_process:cell differentiation(GO:0030154)
ENSG00000169783	-3.06741	-2.59342	0.274957	1	LINGO1	_	molecular_function:epidermal growth factor receptor binding(GO:0005154);cellular_component:plasma membrane(GO:0005886);cellular_component:integral component of membrane(GO:0016021);biological_process:central nervous system neuron development(GO:0021954);biological_process:neuron projection development(GO:0031175);biological_process:protein kinase B signaling(GO:0043491);biological_process:neurotr…
ENSG00000238502	-3.06741	-2.59342	0.274957	1	snoU13	_	_
ENSG00000214344	-3.06741	-2.59342	0.274957	1	OR4F13P	K04257	_
ENSG00000005513	-3.06741	-2.59342	0.274957	1	SOX8	K09270	molecular_function:RNA polymerase II core promoter sequence-specific DNA binding(GO:0000979);biological_process:osteoblast differentiation(GO:0001649);biological_process:in utero embryonic development(GO:0001701);biological_process:neural crest cell migration(GO:0001755);molecular_function:DNA binding(GO:0003677);molecular_function:sequence-specific DNA binding transcription factor activity(GO:00…
ENSG00000169340	-3.06741	-2.59342	0.274957	1	PDILT	K09654	cellular_component:endoplasmic reticulum(GO:0005783);biological_process:multicellular organismal development(GO:0007275);biological_process:spermatogenesis(GO:0007283);molecular_function:isomerase activity(GO:0016853);biological_process:cell differentiation(GO:0030154);biological_process:cell redox homeostasis(GO:0045454)
ENSG00000197322	-3.06741	-2.59342	0.274957	1	C17orf102	_	_
ENSG00000167914	-3.06741	-2.59342	0.274957	1	GSDMA	_	biological_process:apoptotic process(GO:0006915);;cellular_component:perinuclear region of cytoplasm(GO:0048471)
ENSG00000141433	-3.06741	-2.59342	0.274957	1	ADCYAP1	K05262	biological_process:ovarian follicle development(GO:0001541);biological_process:behavioral fear response(GO:0001662);biological_process:histamine secretion(GO:0001821);biological_process:negative regulation of acute inflammatory response to antigenic stimulus(GO:0002865);biological_process:negative regulation of acute inflammatory response to non-antigenic stimulus(GO:0002878);molecular_function:r…
ENSG00000154864	-3.06741	-2.59342	0.274957	1	PIEZO2	K05069	molecular_function:cation channel activity(GO:0005261);biological_process:cation transport(GO:0006812);molecular_function:mechanically-gated ion channel activity(GO:0008381);cellular_component:integral component of membrane(GO:0016021);biological_process:regulation of membrane potential(GO:0042391)
ENSG00000267656	-3.06741	-2.59342	0.274957	1	RP11-807E13.3	K14815	_
ENSG00000057149	-3.06741	-2.59342	0.274957	1	SERPINB3	K13963	molecular_function:virus receptor activity(GO:0001618);molecular_function:serine-type endopeptidase inhibitor activity(GO:0004867);cellular_component:extracellular region(GO:0005576);cellular_component:cytoplasm(GO:0005737);biological_process:response to virus(GO:0009615);biological_process:negative regulation of peptidase activity(GO:0010466);biological_process:negative regulation of endopeptida…
ENSG00000171119	-3.06741	-2.59342	0.274957	1	NRTN	_	biological_process:MAPK cascade(GO:0000165);biological_process:neural crest cell migration(GO:0001755);molecular_function:receptor binding(GO:0005102);cellular_component:extracellular region(GO:0005576);biological_process:transmembrane receptor protein tyrosine kinase signaling pathway(GO:0007169);biological_process:nervous system development(GO:0007399);biological_process:axon guidance(GO:000741…
ENSG00000231274	-3.06741	-2.59342	0.274957	1	SBK3	K08858	_
ENSG00000198440	-3.06741	-2.59342	0.274957	1	ZNF583	K09228	molecular_function:nucleic acid binding(GO:0003676);molecular_function:DNA binding(GO:0003677);cellular_component:intracellular(GO:0005622);cellular_component:nucleus(GO:0005634);biological_process:transcription, DNA-templated(GO:0006351);biological_process:regulation of transcription, DNA-templated(GO:0006355);molecular_function:metal ion binding(GO:0046872)
ENSG00000258873	-3.06741	-2.59342	0.274957	1	DUXA	K01082	molecular_function:transcription regulatory region sequence-specific DNA binding(GO:0000976);molecular_function:sequence-specific DNA binding transcription factor activity(GO:0003700);cellular_component:nucleus(GO:0005634);biological_process:transcription, DNA-templated(GO:0006351)
ENSG00000232056	-3.06741	-2.59342	0.274957	1	AC092687.4	_	_
ENSG00000013016	-3.06741	-2.59342	0.274957	1	EHD3	K12476	molecular_function:nucleic acid binding(GO:0003676);molecular_function:GTPase activity(GO:0003924);molecular_function:calcium ion binding(GO:0005509);molecular_function:protein binding(GO:0005515);molecular_function:ATP binding(GO:0005524);molecular_function:GTP binding(GO:0005525);cellular_component:nucleus(GO:0005634);cellular_component:cytoplasm(GO:0005737);cellular_component:plasma membrane(G…
ENSG00000135625	-3.06741	-2.59342	0.274957	1	EGR4	K12498	molecular_function:DNA binding(GO:0003677);molecular_function:sequence-specific DNA binding transcription factor activity(GO:0003700);cellular_component:nucleus(GO:0005634);biological_process:transcription, DNA-templated(GO:0006351);biological_process:positive regulation of cell proliferation(GO:0008284);molecular_function:metal ion binding(GO:0046872)
ENSG00000153563	-3.06741	-2.59342	0.274957	1	CD8A	K06458	biological_process:T cell mediated immunity(GO:0002456);molecular_function:protein binding(GO:0005515);cellular_component:extracellular region(GO:0005576);cellular_component:plasma membrane(GO:0005886);cellular_component:integral component of plasma membrane(GO:0005887);biological_process:immune response(GO:0006955);biological_process:transmembrane receptor protein tyrosine kinase signaling pathw…
ENSG00000168754	-3.06741	-2.59342	0.274957	1	FAM178B	K12581	_
ENSG00000115607	-3.06741	-2.59342	0.274957	1	IL18RAP	K05174	molecular_function:receptor activity(GO:0004872);biological_process:inflammatory response(GO:0006954);biological_process:immune response(GO:0006955);biological_process:signal transduction(GO:0007165);biological_process:cell surface receptor signaling pathway(GO:0007166);cellular_component:integral component of membrane(GO:0016021)
ENSG00000235522	-3.06741	-2.59342	0.274957	1	AC009505.2	_	_
ENSG00000267784	-3.06741	-2.59342	0.274957	1	RP11-171I2.1	_	_
ENSG00000171551	-3.06741	-2.59342	0.274957	1	ECEL1	K09610	biological_process:respiratory system process(GO:0003016);molecular_function:metalloendopeptidase activity(GO:0004222);cellular_component:integral component of plasma membrane(GO:0005887);biological_process:proteolysis(GO:0006508);biological_process:neuropeptide signaling pathway(GO:0007218);molecular_function:metallopeptidase activity(GO:0008237);molecular_function:metal ion binding(GO:0046872)
ENSG00000132321	-3.06741	-2.59342	0.274957	1	IQCA1	_	molecular_function:ATP binding(GO:0005524)
ENSG00000196209	-3.06741	-2.59342	0.274957	1	SIRPB2	K16826	cellular_component:integral component of membrane(GO:0016021)
ENSG00000175121	-3.06741	-2.59342	0.274957	1	WFDC5	_	molecular_function:serine-type endopeptidase inhibitor activity(GO:0004867);cellular_component:extracellular region(GO:0005576)
ENSG00000101115	-3.06741	-2.59342	0.274957	1	SALL4	_	biological_process:negative regulation of transcription from RNA polymerase II promoter(GO:0000122);cellular_component:heterochromatin(GO:0000792);biological_process:inner cell mass cell proliferation(GO:0001833);biological_process:neural tube closure(GO:0001843);biological_process:ventricular septum development(GO:0003281);molecular_function:nucleic acid binding(GO:0003676);molecular_function:DN…
ENSG00000124092	-3.06741	-2.59342	0.274957	1	CTCFL	_	molecular_function:nucleic acid binding(GO:0003676);molecular_function:DNA binding(GO:0003677);molecular_function:protein binding(GO:0005515);cellular_component:nucleus(GO:0005634);cellular_component:cytoplasm(GO:0005737);biological_process:regulation of gene expression by genetic imprinting(GO:0006349);biological_process:transcription, DNA-templated(GO:0006351);biological_process:cell cycle(GO:0…
ENSG00000154654	-3.06741	-2.59342	0.274957	1	NCAM2	K06491	cellular_component:plasma membrane(GO:0005886);biological_process:cell adhesion(GO:0007155);biological_process:neuron cell-cell adhesion(GO:0007158);cellular_component:membrane(GO:0016020);cellular_component:integral component of membrane(GO:0016021);cellular_component:axon(GO:0030424)
ENSG00000175894	-3.06741	-2.59342	0.274957	1	TSPEAR	_	molecular_function:molecular_function(GO:0003674);cellular_component:extracellular region(GO:0005576);biological_process:sensory perception of sound(GO:0007605);cellular_component:cell surface(GO:0009986);cellular_component:stereocilium(GO:0032420);cellular_component:ciliary membrane(GO:0060170)
ENSG00000224435	-3.06741	-2.59342	0.274957	1	NF1P6	K08052	_
ENSG00000237446	-3.06741	-2.59342	0.274957	1	RHEBP3	_	_
ENSG00000100095	-3.06741	-2.59342	0.274957	1	SEZ6L	_	cellular_component:endoplasmic reticulum membrane(GO:0005789);cellular_component:integral component of membrane(GO:0016021)
ENSG00000100368	-3.06741	-2.59342	0.274957	1	CSF2RB	K04738	molecular_function:receptor activity(GO:0004872);molecular_function:cytokine receptor activity(GO:0004896);molecular_function:interleukin-3 receptor activity(GO:0004912);molecular_function:interleukin-5 receptor activity(GO:0004914);molecular_function:protein binding(GO:0005515);cellular_component:plasma membrane(GO:0005886);cellular_component:integral component of plasma membrane(GO:0005887);bio…
ENSG00000077942	-3.06741	-2.59342	0.274957	1	FBLN1	K17307	molecular_function:extracellular matrix structural constituent(GO:0005201);molecular_function:calcium ion binding(GO:0005509);cellular_component:extracellular region(GO:0005576);cellular_component:proteinaceous extracellular matrix(GO:0005578);cellular_component:basement membrane(GO:0005604);cellular_component:extracellular space(GO:0005615);biological_process:embryo implantation(GO:0007566);mole…
ENSG00000219438	-3.06741	-2.59342	0.274957	1	FAM19A5	_	cellular_component:extracellular region(GO:0005576);cellular_component:integral component of membrane(GO:0016021)
ENSG00000187672	-3.06741	-2.59342	0.274957	1	ERC2	_	molecular_function:protein binding(GO:0005515);cellular_component:cytoplasm(GO:0005737);cellular_component:cytoskeleton(GO:0005856);cellular_component:cell junction(GO:0030054);cellular_component:growth cone(GO:0030426);cellular_component:presynaptic membrane(GO:0042734)
ENSG00000197953	-3.06741	-2.59342	0.274957	1	AADACL2	K14350	;cellular_component:extracellular region(GO:0005576);cellular_component:integral component of membrane(GO:0016021)
ENSG00000181982	-3.06741	-2.59342	0.274957	1	CCDC149	_	_
ENSG00000135222	-3.06741	-2.59342	0.274957	1	CSN2	K17107	molecular_function:enzyme inhibitor activity(GO:0004857);molecular_function:transporter activity(GO:0005215);molecular_function:calcium ion binding(GO:0005509);cellular_component:extracellular region(GO:0005576);biological_process:calcium ion transport(GO:0006816);biological_process:negative regulation of catalytic activity(GO:0043086)
ENSG00000241981	-3.06741	-2.59342	0.274957	1	AF224669.3	K02889	_
ENSG00000138741	-3.06741	-2.59342	0.274957	1	TRPC3	K04966	molecular_function:calcium channel activity(GO:0005262);molecular_function:protein binding(GO:0005515);cellular_component:plasma membrane(GO:0005886);cellular_component:integral component of plasma membrane(GO:0005887);biological_process:calcium ion transport(GO:0006816);biological_process:axon guidance(GO:0007411);biological_process:blood coagulation(GO:0007596);biological_process:phototransduct…
ENSG00000153132	-3.06741	-2.59342	0.274957	1	CLGN	K09551	molecular_function:calcium ion binding(GO:0005509);cellular_component:nuclear envelope(GO:0005635);cellular_component:endoplasmic reticulum(GO:0005783);cellular_component:endoplasmic reticulum membrane(GO:0005789);biological_process:protein folding(GO:0006457);biological_process:protein complex assembly(GO:0006461);biological_process:single fertilization(GO:0007338);biological_process:binding of …
ENSG00000061918	-3.06741	-2.59342	0.274957	1	GUCY1B3	K12319	molecular_function:nucleotide binding(GO:0000166);molecular_function:guanylate cyclase activity(GO:0004383);molecular_function:receptor activity(GO:0004872);molecular_function:GTP binding(GO:0005525);cellular_component:cytoplasm(GO:0005737);biological_process:nitric oxide mediated signal transduction(GO:0007263);biological_process:blood coagulation(GO:0007596);biological_process:blood circulation…
ENSG00000256394	-3.06741	-2.59342	0.274957	1	ASIC5	K04832	cellular_component:plasma membrane(GO:0005886);molecular_function:hydrogen ion channel activity(GO:0015252);molecular_function:ligand-gated sodium channel activity(GO:0015280);cellular_component:integral component of membrane(GO:0016021);biological_process:ion transmembrane transport(GO:0034220);biological_process:transmembrane transport(GO:0055085)
ENSG00000113492	-3.06741	-2.59342	0.274957	1	AGXT2	K00827	cellular_component:mitochondrion(GO:0005739);cellular_component:mitochondrial matrix(GO:0005759);biological_process:pyrimidine nucleobase metabolic process(GO:0006206);molecular_function:alanine-glyoxylate transaminase activity(GO:0008453);molecular_function:transaminase activity(GO:0008483);biological_process:glyoxylate catabolic process(GO:0009436);molecular_function:beta-alanine-pyruvate trans…
ENSG00000145626	-3.06741	-2.59342	0.274957	1	UGT3A1	_	molecular_function:UDP-glycosyltransferase activity(GO:0008194);molecular_function:glucuronosyltransferase activity(GO:0015020);cellular_component:integral component of membrane(GO:0016021);molecular_function:transferase activity, transferring hexosyl groups(GO:0016758);cellular_component:UDP-N-acetylglucosamine transferase complex(GO:0043541)
ENSG00000253978	-3.06741	-2.59342	0.274957	1	CTB-178M22.2	_	_
ENSG00000204764	-3.06741	-2.59342	0.274957	1	RANBP17	_	molecular_function:GTP binding(GO:0005525);cellular_component:nucleus(GO:0005634);cellular_component:nuclear pore(GO:0005643);cellular_component:cytoplasm(GO:0005737);biological_process:protein import into nucleus(GO:0006606);biological_process:intracellular protein transport(GO:0006886);molecular_function:Ran GTPase binding(GO:0008536);biological_process:mRNA transport(GO:0051028)
ENSG00000175325	-3.06741	-2.59342	0.274957	1	PROP1	K09327	biological_process:negative regulation of transcription from RNA polymerase II promoter(GO:0000122);molecular_function:transcription regulatory region sequence-specific DNA binding(GO:0000976);biological_process:blood vessel development(GO:0001568);molecular_function:chromatin binding(GO:0003682);molecular_function:sequence-specific DNA binding transcription factor activity(GO:0003700);cellular_c…
ENSG00000037280	-3.06741	-2.59342	0.274957	1	FLT4	K05097	biological_process:positive regulation of protein phosphorylation(GO:0001934);biological_process:positive regulation of endothelial cell proliferation(GO:0001938);biological_process:vasculature development(GO:0001944);biological_process:lymph vessel development(GO:0001945);biological_process:lymphangiogenesis(GO:0001946);biological_process:sprouting angiogenesis(GO:0002040);molecular_function:tra…
ENSG00000204296	-3.06741	-2.59342	0.274957	1	C6orf10	_	cellular_component:integral component of membrane(GO:0016021)
ENSG00000118432	-3.06741	-2.59342	0.274957	1	CNR1	K04277	biological_process:positive regulation of acute inflammatory response to antigenic stimulus(GO:0002866);molecular_function:cannabinoid receptor activity(GO:0004949);cellular_component:plasma membrane(GO:0005886);cellular_component:integral component of plasma membrane(GO:0005887);biological_process:response to stress(GO:0006950);biological_process:G-protein coupled receptor signaling pathway, cou…
ENSG00000112246	-3.06741	-2.59342	0.274957	1	SIM1	K09100	biological_process:ureteric bud development(GO:0001657);molecular_function:DNA binding(GO:0003677);molecular_function:sequence-specific DNA binding transcription factor activity(GO:0003700);molecular_function:signal transducer activity(GO:0004871);cellular_component:nucleus(GO:0005634);biological_process:transcription, DNA-templated(GO:0006351);biological_process:nervous system development(GO:000…
ENSG00000177468	-3.06741	-2.59342	0.274957	1	OLIG3	K09085	molecular_function:DNA binding(GO:0003677);cellular_component:nucleus(GO:0005634);biological_process:transcription, DNA-templated(GO:0006351);biological_process:regulation of transcription, DNA-templated(GO:0006355);molecular_function:protein dimerization activity(GO:0046983)
ENSG00000120440	-3.06741	-2.59342	0.274957	1	TTLL2	K16600	biological_process:cellular protein modification process(GO:0006464);molecular_function:ligase activity(GO:0016874)
ENSG00000106069	-3.06741	-2.59342	0.274957	1	CHN2	K09228	molecular_function:SH3/SH2 adaptor activity(GO:0005070);molecular_function:GTPase activator activity(GO:0005096);cellular_component:intracellular(GO:0005622);cellular_component:cytosol(GO:0005829);biological_process:signal transduction(GO:0007165);biological_process:small GTPase mediated signal transduction(GO:0007264);cellular_component:membrane(GO:0016020);biological_process:intracellular signa…
ENSG00000019991	-3.06741	-2.59342	0.274957	1	HGF	K05460	biological_process:activation of MAPK activity(GO:0000187);biological_process:cell morphogenesis(GO:0000902);biological_process:epithelial to mesenchymal transition(GO:0001837);biological_process:liver development(GO:0001889);biological_process:platelet degranulation(GO:0002576);molecular_function:serine-type endopeptidase activity(GO:0004252);molecular_function:protein binding(GO:0005515);cellul…
ENSG00000005421	-3.06741	-2.59342	0.274957	1	PON1	K01045	molecular_function:aryldialkylphosphatase activity(GO:0004063);molecular_function:arylesterase activity(GO:0004064);molecular_function:calcium ion binding(GO:0005509);molecular_function:phospholipid binding(GO:0005543);cellular_component:extracellular region(GO:0005576);cellular_component:extracellular space(GO:0005615);biological_process:cholesterol metabolic process(GO:0008203);biological_proce…
ENSG00000160963	-3.06741	-2.59342	0.274957	1	COL26A1	_	cellular_component:extracellular region(GO:0005576);cellular_component:collagen trimer(GO:0005581);cellular_component:endoplasmic reticulum lumen(GO:0005788);cellular_component:plasma membrane(GO:0005886);biological_process:extracellular matrix disassembly(GO:0022617);biological_process:extracellular matrix organization(GO:0030198);biological_process:collagen catabolic process(GO:0030574)
ENSG00000157703	-3.06741	-2.59342	0.274957	1	SVOPL	_	cellular_component:integral component of membrane(GO:0016021);molecular_function:transmembrane transporter activity(GO:0022857)
ENSG00000268085	-3.06741	-2.59342	0.274957	1	AC051642.1	_	_
ENSG00000254013	-3.06741	-2.59342	0.274957	1	MAP2K1P1	K04368	_
ENSG00000188778	-3.06741	-2.59342	0.274957	1	ADRB3	K04143	biological_process:diet induced thermogenesis(GO:0002024);biological_process:vasodilation by norepinephrine-epinephrine involved in regulation of systemic arterial blood pressure(GO:0002025);biological_process:desensitization of G-protein coupled receptor protein signaling pathway by arrestin(GO:0002032);molecular_function:beta-adrenergic receptor activity(GO:0004939);molecular_function:protein b…
ENSG00000188676	-3.06741	-2.59342	0.274957	1	IDO2	K00463	molecular_function:tryptophan 2,3-dioxygenase activity(GO:0004833);cellular_component:cytoplasm(GO:0005737);cellular_component:cytosol(GO:0005829);biological_process:tryptophan catabolic process(GO:0006569);biological_process:tryptophan catabolic process to kynurenine(GO:0019441);molecular_function:heme binding(GO:0020037);molecular_function:indoleamine 2,3-dioxygenase activity(GO:0033754);biolog…
ENSG00000206579	-3.06741	-2.59342	0.274957	1	XKR4	_	cellular_component:integral component of membrane(GO:0016021)
ENSG00000164749	-3.06741	-2.59342	0.274957	1	HNF4G	K08037	molecular_function:sequence-specific DNA binding transcription factor activity(GO:0003700);molecular_function:steroid hormone receptor activity(GO:0003707);molecular_function:ligand-activated sequence-specific DNA binding RNA polymerase II transcription factor activity(GO:0004879);cellular_component:nucleoplasm(GO:0005654);biological_process:regulation of transcription from RNA polymerase II prom…
ENSG00000147588	-3.06741	-2.59342	0.274957	1	PMP2	K08753	molecular_function:transporter activity(GO:0005215);molecular_function:fatty acid binding(GO:0005504);cellular_component:cytoplasm(GO:0005737);molecular_function:lipid binding(GO:0008289);molecular_function:cholesterol binding(GO:0015485);biological_process:membrane organization(GO:0061024)
ENSG00000268080	-3.06741	-2.59342	0.274957	1	AC016885.1	_	_
ENSG00000188133	-3.06741	-2.59342	0.274957	1	TMEM215	_	cellular_component:integral component of membrane(GO:0016021)
ENSG00000130707	-3.06741	-2.59342	0.274957	1	ASS1	K01940	biological_process:urea cycle(GO:0000050);molecular_function:argininosuccinate synthase activity(GO:0004055);molecular_function:protein binding(GO:0005515);molecular_function:ATP binding(GO:0005524);cellular_component:cytoplasm(GO:0005737);cellular_component:cytosol(GO:0005829);biological_process:arginine biosynthetic process(GO:0006526);biological_process:cellular nitrogen compound metabolic pro…
ENSG00000197859	-3.06741	-2.59342	0.274957	1	ADAMTSL2	_	molecular_function:metalloendopeptidase activity(GO:0004222);molecular_function:protein binding(GO:0005515);cellular_component:proteinaceous extracellular matrix(GO:0005578);molecular_function:zinc ion binding(GO:0008270);biological_process:negative regulation of transforming growth factor beta receptor signaling pathway(GO:0030512)
ENSG00000047597	-3.06741	-2.59342	0.274957	1	XK	K19522	molecular_function:transporter activity(GO:0005215);molecular_function:protein binding(GO:0005515);biological_process:transport(GO:0006810);biological_process:amino acid transport(GO:0006865);cellular_component:integral component of membrane(GO:0016021)
ENSG00000067445	-3.06741	-2.59342	0.274957	1	TRO	_	molecular_function:protein binding(GO:0005515);cellular_component:nucleus(GO:0005634);cellular_component:cytoplasm(GO:0005737);cellular_component:plasma membrane(GO:0005886);cellular_component:integral component of plasma membrane(GO:0005887);biological_process:homophilic cell adhesion via plasma membrane adhesion molecules(GO:0007156);biological_process:embryo implantation(GO:0007566);biological…
ENSG00000153779	-3.06741	-2.59342	0.274957	1	TGIF2LX	K19554	molecular_function:sequence-specific DNA binding transcription factor activity(GO:0003700);cellular_component:nucleus(GO:0005634);biological_process:transcription, DNA-templated(GO:0006351);molecular_function:sequence-specific DNA binding(GO:0043565)
ENSG00000123572	-3.06741	-2.59342	0.274957	1	NRK	K16313	molecular_function:protein serine/threonine kinase activity(GO:0004674);;molecular_function:ATP binding(GO:0005524);biological_process:activation of JNKK activity(GO:0007256);biological_process:parturition(GO:0007567);biological_process:negative regulation of cell proliferation(GO:0008285);molecular_function:kinase activity(GO:0016301);biological_process:regulation of spongiotrophoblast cell prol…
ENSG00000214992	-3.06741	-2.59342	0.274957	1	AKAP17BP	K13169	_
ENSG00000271461	-3.06649	-0.394489	6.02e-09	2.09e-07	RP4-673D20.6	K16769	_
ENSG00000244609	-3.06282	-2.59347	0.274957	1	RN7SL532P	_	_
ENSG00000229044	-3.06282	-2.59347	0.274957	1	RP11-266K22.2	_	_
ENSG00000264419	-3.06282	-2.59347	0.274957	1	MIR548AC	_	_
ENSG00000235428	-3.06282	-2.59347	0.274957	1	WI2-2998D17.2	K10486	_
ENSG00000252131	-3.06282	-2.59347	0.274957	1	AL844165.1	_	_
ENSG00000226416	-3.06282	-2.59347	0.274957	1	MRPL23-AS1	_	_
ENSG00000170688	-3.06282	-2.59347	0.274957	1	OR5E1P	K04257	_
ENSG00000206911	-3.06282	-2.59347	0.274957	1	Y_RNA	_	_
ENSG00000250519	-3.06282	-2.59347	0.274957	1	RP11-680H20.2	_	_
ENSG00000004939	-3.06282	-2.59347	0.274957	1	SLC4A1	K06573	molecular_function:actin binding(GO:0003779);molecular_function:inorganic anion exchanger activity(GO:0005452);molecular_function:protein binding(GO:0005515);cellular_component:plasma membrane(GO:0005886);cellular_component:integral component of plasma membrane(GO:0005887);biological_process:ion transport(GO:0006811);biological_process:anion transport(GO:0006820);biological_process:chloride trans…
ENSG00000196169	-3.06282	-2.59347	0.274957	1	KIF19	K10401	molecular_function:microtubule motor activity(GO:0003777);molecular_function:ATP binding(GO:0005524);cellular_component:cytoplasm(GO:0005737);cellular_component:kinesin complex(GO:0005871);cellular_component:microtubule(GO:0005874);cellular_component:cilium(GO:0005929);biological_process:microtubule-based movement(GO:0007018);molecular_function:microtubule binding(GO:0008017);molecular_function:A…
ENSG00000166960	-3.06282	-2.59347	0.274957	1	CCDC178	_	_
ENSG00000267179	-3.06282	-2.59347	0.274957	1	ZNF763	K09228	molecular_function:nucleic acid binding(GO:0003676);molecular_function:DNA binding(GO:0003677);cellular_component:intracellular(GO:0005622);cellular_component:nucleus(GO:0005634);biological_process:transcription, DNA-templated(GO:0006351);biological_process:regulation of transcription, DNA-templated(GO:0006355);molecular_function:metal ion binding(GO:0046872)
ENSG00000264515	-3.06282	-2.59347	0.274957	1	CTC-525D6.1	_	_
ENSG00000104972	-3.06282	-2.59347	0.274957	1	LILRB1	K06512	biological_process:negative regulation of T cell mediated cytotoxicity(GO:0001915);biological_process:positive regulation of defense response to virus by host(GO:0002230);biological_process:T cell proliferation involved in immune response(GO:0002309);biological_process:negative regulation of cytokine secretion involved in immune response(GO:0002740);biological_process:immune response-inhibiting c…
ENSG00000072080	-3.06282	-2.59347	0.274957	1	SPP2	_	biological_process:skeletal system development(GO:0001501);molecular_function:endopeptidase inhibitor activity(GO:0004866);cellular_component:extracellular region(GO:0005576);biological_process:protein complex assembly(GO:0006461);biological_process:negative regulation of endopeptidase activity(GO:0010951);cellular_component:protein complex(GO:0043234);biological_process:bone remodeling(GO:004684…
ENSG00000224961	-3.06282	-2.59347	0.274957	1	RP1-278O22.1	_	_
ENSG00000124212	-3.06282	-2.59347	0.274957	1	PTGIS	K01831	biological_process:prostaglandin biosynthetic process(GO:0001516);molecular_function:monooxygenase activity(GO:0004497);molecular_function:iron ion binding(GO:0005506);molecular_function:protein binding(GO:0005515);cellular_component:extracellular space(GO:0005615);cellular_component:nucleus(GO:0005634);cellular_component:endoplasmic reticulum(GO:0005783);cellular_component:endoplasmic reticulum …
ENSG00000234340	-3.06282	-2.59347	0.274957	1	AP000705.8	_	_
ENSG00000198643	-3.06282	-2.59347	0.274957	1	FAM3D	_	molecular_function:cytokine activity(GO:0005125);cellular_component:extracellular region(GO:0005576);biological_process:negative regulation of insulin secretion(GO:0046676)
ENSG00000138271	-3.06282	-2.59347	0.274957	1	GPR87	K08389	cellular_component:plasma membrane(GO:0005886);biological_process:negative regulation of adenylate cyclase activity(GO:0007194);biological_process:biological_process(GO:0008150);cellular_component:integral component of membrane(GO:0016021);molecular_function:G-protein coupled purinergic nucleotide receptor activity(GO:0045028)
ENSG00000201441	-3.06282	-2.59347	0.274957	1	RNU6-646P	_	_
ENSG00000249547	-3.06282	-2.59347	0.274957	1	RP11-453O5.1	_	_
ENSG00000248744	-3.06282	-2.59347	0.274957	1	RP11-362I1.1	_	_
ENSG00000251703	-3.06282	-2.59347	0.274957	1	RNU6-998P	_	_
ENSG00000187054	-3.06282	-2.59347	0.274957	1	TMPRSS11A	K09750	molecular_function:serine-type endopeptidase activity(GO:0004252);cellular_component:extracellular region(GO:0005576);cellular_component:integral component of plasma membrane(GO:0005887);biological_process:proteolysis(GO:0006508);biological_process:cell cycle(GO:0007049)
ENSG00000113520	-3.06282	-2.59347	0.274957	1	IL4	K05430	biological_process:innate immune response in mucosa(GO:0002227);biological_process:T-helper 1 cell lineage commitment(GO:0002296);biological_process:negative regulation of acute inflammatory response(GO:0002674);biological_process:negative regulation of chronic inflammatory response(GO:0002677);molecular_function:cytokine activity(GO:0005125);molecular_function:interleukin-4 receptor binding(GO:0…
ENSG00000221552	-3.06282	-2.59347	0.274957	1	MIR1303	_	_
ENSG00000233981	-3.06282	-2.59347	0.274957	1	RP3-380E11.2	_	_
ENSG00000158553	-3.06282	-2.59347	0.274957	1	POM121L2	K14316	_
ENSG00000217325	-3.06282	-2.59347	0.274957	1	PRELID1P1	_	_
ENSG00000185345	-3.06282	-2.59347	0.274957	1	PARK2	K04556	biological_process:protein polyubiquitination(GO:0000209);biological_process:mitochondrion degradation(GO:0000422);biological_process:negative regulation of protein phosphorylation(GO:0001933);molecular_function:ubiquitin-protein transferase activity(GO:0004842);molecular_function:protein binding(GO:0005515);cellular_component:nucleus(GO:0005634);cellular_component:cytoplasm(GO:0005737);cellular_…
ENSG00000232385	-3.06282	-2.59347	0.274957	1	RPS3AP25	K02984	_
ENSG00000239021	-3.06282	-2.59347	0.274957	1	RNA5SP246	_	_
ENSG00000163645	-3.06027	-1.80093	0.013335	0.115317	FAM194A	_	_
ENSG00000255250	-3.05537	-1.80089	0.013335	0.115317	CTD-2005H7.2	_	_
ENSG00000222511	-3.05515	-2.59355	0.274957	1	Y_RNA	_	_
ENSG00000175262	-3.05515	-2.59355	0.274957	1	C1orf127	_	_
ENSG00000204624	-3.05515	-2.59355	0.274957	1	PTCHD2	_	molecular_function:molecular_function(GO:0003674);cellular_component:endoplasmic reticulum(GO:0005783);biological_process:smoothened signaling pathway(GO:0007224);molecular_function:hedgehog receptor activity(GO:0008158);cellular_component:integral component of membrane(GO:0016021);cellular_component:nuclear membrane(GO:0031965);biological_process:regulation of lipid transport(GO:0032368);biologi…
ENSG00000162543	-3.05515	-2.59355	0.274957	1	UBXN10	_	_
ENSG00000240553	-3.05515	-2.59355	0.274957	1	RP1-184J9.2	_	_
ENSG00000231953	-3.05515	-2.59355	0.274957	1	RP4-706G24.1	_	_
ENSG00000116544	-3.05515	-2.59355	0.274957	1	DLGAP3	_	molecular_function:beta-amyloid binding(GO:0001540);molecular_function:protein binding(GO:0005515);cellular_component:plasma membrane(GO:0005886);biological_process:cell-cell signaling(GO:0007267);cellular_component:postsynaptic density(GO:0014069);cellular_component:cell junction(GO:0030054);cellular_component:postsynaptic membrane(GO:0045211)
ENSG00000236274	-3.05515	-2.59355	0.274957	1	RP4-728D4.3	_	_
ENSG00000186160	-3.05515	-2.59355	0.274957	1	CYP4Z1	K07429	molecular_function:iron ion binding(GO:0005506);cellular_component:endoplasmic reticulum membrane(GO:0005789);molecular_function:electron carrier activity(GO:0009055);cellular_component:integral component of membrane(GO:0016021);molecular_function:heme binding(GO:0020037);molecular_function:aromatase activity(GO:0070330)
ENSG00000177452	-3.05515	-2.59355	0.274957	1	RP4-597J3.1	K02885	_
ENSG00000229294	-3.05515	-2.59355	0.274957	1	RP5-1044H5.1	_	_
ENSG00000266811	-3.05515	-2.59355	0.274957	1	MIR3118-3	_	_
ENSG00000252105	-3.05515	-2.59355	0.274957	1	RNU1-143P	_	_
ENSG00000027869	-3.05515	-2.59355	0.274957	1	SH2D2A	K08273	biological_process:angiogenesis(GO:0001525);molecular_function:SH3/SH2 adaptor activity(GO:0005070);cellular_component:cytoplasm(GO:0005737);biological_process:signal transduction(GO:0007165);biological_process:cell proliferation(GO:0008283);molecular_function:SH3 domain binding(GO:0017124);biological_process:cell differentiation(GO:0030154)
ENSG00000163518	-3.05515	-2.59355	0.274957	1	FCRL4	_	molecular_function:protein binding(GO:0005515);cellular_component:plasma membrane(GO:0005886);cellular_component:integral component of membrane(GO:0016021)
ENSG00000158481	-3.05515	-2.59355	0.274957	1	CD1C	K06448	biological_process:T cell activation involved in immune response(GO:0002286);cellular_component:plasma membrane(GO:0005886);cellular_component:integral component of plasma membrane(GO:0005887);biological_process:immune response(GO:0006955);cellular_component:endosome membrane(GO:0010008);cellular_component:membrane(GO:0016020);biological_process:antigen processing and presentation(GO:0019882);mol…
ENSG00000259788	-3.05515	-2.59355	0.274957	1	RP11-359K18.3	_	_
ENSG00000116785	-3.05515	-2.59355	0.274957	1	CFHR3	_	cellular_component:extracellular space(GO:0005615)
ENSG00000233791	-3.05515	-2.59355	0.274957	1	LINC01136	_	_
ENSG00000236905	-3.05515	-2.59355	0.274957	1	RP11-348H3.2	K02989	_
ENSG00000236244	-3.05515	-2.59355	0.274957	1	RP4-799P18.3	_	_
ENSG00000226876	-3.05515	-2.59355	0.274957	1	RP11-36N20.1	_	_
ENSG00000227953	-3.05515	-2.59355	0.274957	1	RP11-439E19.3	_	_
ENSG00000173876	-3.05515	-2.59355	0.274957	1	TUBB8	K07375	molecular_function:GTPase activity(GO:0003924);molecular_function:structural constituent of cytoskeleton(GO:0005200);molecular_function:GTP binding(GO:0005525);cellular_component:cytoplasm(GO:0005737);cellular_component:microtubule(GO:0005874);cellular_component:plasma membrane(GO:0005886);biological_process:microtubule-based process(GO:0007017);cellular_component:microtubule cytoskeleton(GO:0015…
ENSG00000196326	-3.05515	-2.59355	0.274957	1	AKR1CL1	_	cellular_component:cytoplasm(GO:0005737);molecular_function:oxidoreductase activity(GO:0016491)
ENSG00000238021	-3.05515	-2.59355	0.274957	1	ARMC4P1	_	_
ENSG00000230397	-3.05515	-2.59355	0.274957	1	SPTLC1P1	K00654	_
ENSG00000234173	-3.05515	-2.59355	0.274957	1	RP11-257I14.1	_	_
ENSG00000184111	-3.05515	-2.59355	0.274957	1	RP11-366I13.3	K02868	_
ENSG00000244332	-3.05515	-2.59355	0.274957	1	RP11-119K6.6	_	_
ENSG00000095713	-3.05515	-2.59355	0.274957	1	CRTAC1	_	molecular_function:calcium ion binding(GO:0005509);cellular_component:proteinaceous extracellular matrix(GO:0005578)
ENSG00000170430	-3.05515	-2.59355	0.274957	1	MGMT	K00567	molecular_function:DNA binding(GO:0003677);molecular_function:methylated-DNA-[protein]-cysteine S-methyltransferase activity(GO:0003908);molecular_function:calcium ion binding(GO:0005509);cellular_component:nucleus(GO:0005634);cellular_component:nucleoplasm(GO:0005654);biological_process:DNA ligation(GO:0006266);biological_process:DNA repair(GO:0006281);biological_process:DNA methylation(GO:00063…
ENSG00000189275	-3.05515	-2.59355	0.274957	1	AL450307.1	_	_
ENSG00000171798	-3.05515	-2.59355	0.274957	1	KNDC1	_	biological_process:positive regulation of protein phosphorylation(GO:0001934);molecular_function:molecular_function(GO:0003674);molecular_function:protein serine/threonine kinase activity(GO:0004674);molecular_function:guanyl-nucleotide exchange factor activity(GO:0005085);molecular_function:Ras guanyl-nucleotide exchange factor activity(GO:0005088);cellular_component:cellular_component(GO:000557…
ENSG00000229534	-3.05515	-2.59355	0.274957	1	HNRNPA1P53	K12741	_
ENSG00000254654	-3.05515	-2.59355	0.274957	1	AC068858.1	_	_
ENSG00000271350	-3.05515	-2.59355	0.274957	1	CTD-2384B9.1	K01551	_
ENSG00000212093	-3.05515	-2.59355	0.274957	1	AP000807.1	_	_
ENSG00000221333	-3.05515	-2.59355	0.274957	1	MIR548K	_	_
ENSG00000110244	-3.05515	-2.59355	0.274957	1	APOA4	K08760	biological_process:retinoid metabolic process(GO:0001523);biological_process:innate immune response in mucosa(GO:0002227);molecular_function:lipid transporter activity(GO:0005319);molecular_function:copper ion binding(GO:0005507);cellular_component:extracellular region(GO:0005576);cellular_component:extracellular space(GO:0005615);cellular_component:early endosome(GO:0005769);cellular_component:e…
ENSG00000236027	-3.05515	-2.59355	0.274957	1	PATE3	_	cellular_component:extracellular region(GO:0005576)
ENSG00000272981	-3.05515	-2.59355	0.274957	1	CTD-2234N14.2	_	_
ENSG00000226397	-3.05515	-2.59355	0.274957	1	C12orf77	K15688	_
ENSG00000256747	-3.05515	-2.59355	0.274957	1	RP11-860B13.1	_	_
ENSG00000257989	-3.05515	-2.59355	0.274957	1	RP1-288H2.2	_	_
ENSG00000127318	-3.05515	-2.59355	0.274957	1	IL22	K05445	molecular_function:cytokine activity(GO:0005125);cellular_component:extracellular region(GO:0005576);cellular_component:extracellular space(GO:0005615);biological_process:acute-phase response(GO:0006953);biological_process:inflammatory response(GO:0006954);biological_process:cell-cell signaling(GO:0007267);molecular_function:interleukin-22 receptor binding(GO:0045518)
ENSG00000257956	-3.05515	-2.59355	0.274957	1	RP11-359M6.3	K14564	_
ENSG00000171759	-3.05515	-2.59355	0.274957	1	PAH	_	molecular_function:phenylalanine 4-monooxygenase activity(GO:0004505);molecular_function:iron ion binding(GO:0005506);cellular_component:cytosol(GO:0005829);biological_process:L-phenylalanine catabolic process(GO:0006559);biological_process:cellular amino acid biosynthetic process(GO:0008652);biological_process:aromatic amino acid family metabolic process(GO:0009072);molecular_function:amino acid…
ENSG00000229375	-3.05515	-2.59355	0.274957	1	USP24P1	K11840	_
ENSG00000226633	-3.05515	-2.59355	0.274957	1	PPIAP28	K03767	_
ENSG00000165566	-3.05515	-2.59355	0.274957	1	AMER2	_	molecular_function:protein binding(GO:0005515);molecular_function:phosphatidylinositol-4,5-bisphosphate binding(GO:0005546);cellular_component:plasma membrane(GO:0005886);biological_process:ectoderm development(GO:0007398);biological_process:Wnt signaling pathway(GO:0016055);biological_process:negative regulation of canonical Wnt signaling pathway(GO:0090090)
ENSG00000132938	-3.05515	-2.59355	0.274957	1	MTUS2	_	molecular_function:protein binding(GO:0005515);cellular_component:centrosome(GO:0005813);cellular_component:cytoplasmic microtubule(GO:0005881);molecular_function:microtubule binding(GO:0008017);molecular_function:protein homodimerization activity(GO:0042803)
ENSG00000150361	-3.05515	-2.59355	0.274957	1	KLHL1	K10442	molecular_function:actin binding(GO:0003779);cellular_component:cytoplasm(GO:0005737);cellular_component:cytoskeleton(GO:0005856);biological_process:adult walking behavior(GO:0007628);biological_process:dendrite development(GO:0016358);biological_process:cerebellar Purkinje cell layer development(GO:0021680);biological_process:actin cytoskeleton organization(GO:0030036);cellular_component:dendrit…
ENSG00000229622	-3.05515	-2.59355	0.274957	1	MTND5P2	_	_
ENSG00000222036	-3.05515	-2.59355	0.274957	1	POTEG	K17299	_
ENSG00000259334	-3.05515	-2.59355	0.274957	1	LINC00596	_	cellular_component:integral component of membrane(GO:0016021)
ENSG00000226677	-3.05515	-2.59355	0.274957	1	IGBP1P1	K17606	_
ENSG00000198807	-3.05515	-2.59355	0.274957	1	PAX9	K09382	molecular_function:DNA binding(GO:0003677);molecular_function:protein binding(GO:0005515);cellular_component:nucleus(GO:0005634);cellular_component:mitochondrion(GO:0005739);biological_process:transcription, DNA-templated(GO:0006351);biological_process:regulation of transcription, DNA-templated(GO:0006355);biological_process:multicellular organismal development(GO:0007275);biological_process:endo…
ENSG00000259079	-3.05515	-2.59355	0.274957	1	RP1-261D10.1	_	_
ENSG00000258448	-3.05515	-2.59355	0.274957	1	RP11-109N23.5	_	_
ENSG00000254656	-3.05515	-2.59355	0.274957	1	RTL1	_	biological_process:multicellular organismal development(GO:0007275);cellular_component:integral component of membrane(GO:0016021)
ENSG00000265102	-3.05515	-2.59355	0.274957	1	MIR3942	_	_
ENSG00000186417	-3.05515	-2.59355	0.274957	1	GLDN	K16364	cellular_component:collagen trimer(GO:0005581);cellular_component:extracellular space(GO:0005615);cellular_component:plasma membrane(GO:0005886);cellular_component:integral component of membrane(GO:0016021);biological_process:microvillus organization(GO:0032528);biological_process:clustering of voltage-gated sodium channels(GO:0045162);molecular_function:protein binding involved in heterotypic ce…
ENSG00000249487	-3.05515	-2.59355	0.274957	1	RP11-97O12.2	_	_
ENSG00000196364	-3.05515	-2.59355	0.274957	1	PRSS29P	_	molecular_function:serine-type endopeptidase activity(GO:0004252);cellular_component:extracellular region(GO:0005576);biological_process:proteolysis(GO:0006508)
ENSG00000269049	-3.05515	-2.59355	0.274957	1	AC092291.2	_	_
ENSG00000238728	-3.05515	-2.59355	0.274957	1	MIR1972-1	_	_
ENSG00000102935	-3.05515	-2.59355	0.274957	1	ZNF423	_	molecular_function:nucleic acid binding(GO:0003676);molecular_function:DNA binding(GO:0003677);molecular_function:protein binding(GO:0005515);cellular_component:nucleus(GO:0005634);biological_process:transcription, DNA-templated(GO:0006351);biological_process:Notch signaling pathway(GO:0007219);biological_process:nervous system development(GO:0007399);biological_process:cell differentiation(GO:00…
ENSG00000168928	-3.05515	-2.59355	0.274957	1	CTRB2	K01310	molecular_function:serine-type endopeptidase activity(GO:0004252);cellular_component:extracellular region(GO:0005576);cellular_component:extracellular space(GO:0005615);biological_process:proteolysis(GO:0006508);biological_process:vitamin metabolic process(GO:0006766);biological_process:water-soluble vitamin metabolic process(GO:0006767);biological_process:digestion(GO:0007586);biological_process…
ENSG00000243423	-3.05515	-2.59355	0.274957	1	RP5-837J1.1	K02922	_
ENSG00000267118	-3.05515	-2.59355	0.274957	1	CTB-91J4.1	_	_
ENSG00000267613	-3.05515	-2.59355	0.274957	1	RP11-378E13.4	_	_
ENSG00000238704	-3.05515	-2.59355	0.274957	1	RNU7-97P	_	_
ENSG00000271222	-3.05515	-2.59355	0.274957	1	RP11-1072C15.7	_	_
ENSG00000263938	-3.05515	-2.59355	0.274957	1	RP11-579O24.3	_	_
ENSG00000266891	-3.05515	-2.59355	0.274957	1	RP11-692N5.2	K02900	_
ENSG00000197641	-3.05515	-2.59355	0.274957	1	SERPINB13	K13963	molecular_function:serine-type endopeptidase inhibitor activity(GO:0004867);cellular_component:extracellular region(GO:0005576);cellular_component:cytoplasm(GO:0005737);biological_process:response to UV(GO:0009411);biological_process:negative regulation of endopeptidase activity(GO:0010951);biological_process:regulation of proteolysis(GO:0030162)
ENSG00000269169	-3.05515	-2.59355	0.274957	1	AC004528.1	K12884	_
ENSG00000127530	-3.05515	-2.59355	0.274957	1	OR7C1	K04257	molecular_function:G-protein coupled receptor activity(GO:0004930);molecular_function:olfactory receptor activity(GO:0004984);cellular_component:plasma membrane(GO:0005886);biological_process:spermatogenesis(GO:0007283);cellular_component:integral component of membrane(GO:0016021)
ENSG00000186487	-3.05515	-2.59355	0.274957	1	MYT1L	_	molecular_function:DNA binding(GO:0003677);molecular_function:sequence-specific DNA binding transcription factor activity(GO:0003700);cellular_component:nucleus(GO:0005634);biological_process:transcription, DNA-templated(GO:0006351);biological_process:nervous system development(GO:0007399);molecular_function:zinc ion binding(GO:0008270);biological_process:cell differentiation(GO:0030154)
ENSG00000228108	-3.05515	-2.59355	0.274957	1	AC092839.3	_	_
ENSG00000228541	-3.05515	-2.59355	0.274957	1	AC093159.1	_	_
ENSG00000270723	-3.05515	-2.59355	0.274957	1	RP11-401N16.1	_	_
ENSG00000228272	-3.05515	-2.59355	0.274957	1	AC106874.1	_	_
ENSG00000115523	-3.05515	-2.59355	0.274957	1	GNLY	_	cellular_component:extracellular space(GO:0005615);biological_process:cellular defense response(GO:0006968);biological_process:killing of cells of other organism(GO:0031640);biological_process:defense response to bacterium(GO:0042742);biological_process:defense response to fungus(GO:0050832)
ENSG00000265507	-3.05515	-2.59355	0.274957	1	MIR4435-1	_	_
ENSG00000232377	-3.05515	-2.59355	0.274957	1	AC016910.1	_	_
ENSG00000213958	-3.05515	-2.59355	0.274957	1	KRT18P29	K07604	_
ENSG00000265252	-3.05515	-2.59355	0.274957	1	MIR3132	_	_
ENSG00000144460	-3.05515	-2.59355	0.274957	1	NYAP2	_	biological_process:phosphatidylinositol 3-kinase signaling(GO:0014065);biological_process:neuron projection morphogenesis(GO:0048812)
ENSG00000226229	-3.05515	-2.59355	0.274957	1	RPLP0P1	_	_
ENSG00000167098	-3.05515	-2.59355	0.274957	1	SUN5	_	molecular_function:molecular_function(GO:0003674);cellular_component:cellular_component(GO:0005575);cellular_component:nuclear inner membrane(GO:0005637);biological_process:spermatogenesis(GO:0007283);cellular_component:integral component of membrane(GO:0016021)
ENSG00000235514	-3.05515	-2.59355	0.274957	1	AP000226.9	_	_
ENSG00000202239	-3.05515	-2.59355	0.274957	1	RNU6-396P	_	_
ENSG00000237358	-3.05515	-2.59355	0.274957	1	AC007064.25	K12019	_
ENSG00000235445	-3.05515	-2.59355	0.274957	1	XXbac-B476C20.14	_	_
ENSG00000250261	-3.05515	-2.59355	0.274957	1	AC007050.18	_	_
ENSG00000244671	-3.05515	-2.59355	0.274957	1	RN7SL280P	_	_
ENSG00000202268	-3.05515	-2.59355	0.274957	1	U3	_	_
ENSG00000183396	-3.05515	-2.59355	0.274957	1	TMEM89	_	cellular_component:integral component of membrane(GO:0016021)
ENSG00000201301	-3.05515	-2.59355	0.274957	1	RNA5SP130	_	_
ENSG00000230655	-3.05515	-2.59355	0.274957	1	OR7E55P	K04257	_
ENSG00000180697	-3.05515	-2.59355	0.274957	1	C3orf22	_	_
ENSG00000249407	-3.05515	-2.59355	0.274957	1	IL20RB-AS1	_	_
ENSG00000207963	-3.05515	-2.59355	0.274957	1	MIR569	_	_
ENSG00000248444	-3.05515	-2.59355	0.274957	1	HNRNPA1P65	K12741	_
ENSG00000169245	-3.05515	-2.59355	0.274957	1	CXCL10	K12671	biological_process:positive regulation of leukocyte chemotaxis(GO:0002690);molecular_function:receptor binding(GO:0005102);cellular_component:extracellular region(GO:0005576);cellular_component:extracellular space(GO:0005615);biological_process:chemotaxis(GO:0006935);biological_process:inflammatory response(GO:0006954);biological_process:immune response(GO:0006955);biological_process:signal trans…
ENSG00000250214	-3.05515	-2.59355	0.274957	1	RP13-488H8.1	K02268	_
ENSG00000151615	-3.05515	-2.59355	0.274957	1	POU4F2	K09366	biological_process:negative regulation of transcription from RNA polymerase II promoter(GO:0000122);biological_process:MAPK cascade(GO:0000165);molecular_function:RNA polymerase II core promoter proximal region sequence-specific DNA binding(GO:0000978);molecular_function:RNA polymerase II core promoter proximal region sequence-specific DNA binding transcription factor activity involved in positiv…
ENSG00000171564	-3.05515	-2.59355	0.274957	1	FGB	K03904	biological_process:platelet degranulation(GO:0002576);molecular_function:receptor binding(GO:0005102);cellular_component:extracellular region(GO:0005576);cellular_component:fibrinogen complex(GO:0005577);cellular_component:extracellular space(GO:0005615);cellular_component:plasma membrane(GO:0005886);cellular_component:cell cortex(GO:0005938);biological_process:signal transduction(GO:0007165);bio…
ENSG00000250475	-3.05515	-2.59355	0.274957	1	RP11-312A15.3	K02934	_
ENSG00000164128	-3.05515	-2.59355	0.274957	1	NPY1R	K04204	molecular_function:peptide YY receptor activity(GO:0001601);molecular_function:pancreatic polypeptide receptor activity(GO:0001602);biological_process:outflow tract morphogenesis(GO:0003151);molecular_function:neuropeptide Y receptor activity(GO:0004983);molecular_function:protein binding(GO:0005515);cellular_component:plasma membrane(GO:0005886);cellular_component:integral component of plasma me…
ENSG00000164303	-3.05515	-2.59355	0.274957	1	ENPP6	K08743	cellular_component:extracellular region(GO:0005576);cellular_component:plasma membrane(GO:0005886);biological_process:lipid metabolic process(GO:0006629);molecular_function:phosphoric diester hydrolase activity(GO:0008081);molecular_function:glycerophosphodiester phosphodiesterase activity(GO:0008889);biological_process:lipid catabolic process(GO:0016042);biological_process:choline metabolic proc…
ENSG00000250490	-3.05515	-2.59355	0.274957	1	CTD-2324F15.2	_	_
ENSG00000249160	-3.05515	-2.59355	0.274957	1	RP11-1C1.5	_	_
ENSG00000203563	-3.05515	-2.59355	0.274957	1	AC138951.1	K13194	_
ENSG00000168671	-3.05515	-2.59355	0.274957	1	UGT3A2	_	molecular_function:UDP-glycosyltransferase activity(GO:0008194);molecular_function:glucuronosyltransferase activity(GO:0015020);cellular_component:integral component of membrane(GO:0016021);molecular_function:transferase activity, transferring hexosyl groups(GO:0016758);biological_process:cellular response to genistein(GO:0071412)
ENSG00000250687	-3.05515	-2.59355	0.274957	1	RP11-497H16.7	K12807	_
ENSG00000264142	-3.05515	-2.59355	0.274957	1	AC114969.1	_	_
ENSG00000239011	-3.05515	-2.59355	0.274957	1	snoU13	_	_
ENSG00000069011	-3.05515	-2.59355	0.274957	1	PITX1	K09356	molecular_function:protein binding transcription factor activity(GO:0000988);biological_process:skeletal system development(GO:0001501);molecular_function:sequence-specific DNA binding transcription factor activity(GO:0003700);cellular_component:nucleus(GO:0005634);cellular_component:transcription factor complex(GO:0005667);cellular_component:nucleolus(GO:0005730);cellular_component:cytoplasm(GO:…
ENSG00000250284	-3.05515	-2.59355	0.274957	1	CTB-1I21.1	_	_
ENSG00000204970	-3.05515	-2.59355	0.274957	1	PCDHA1	K16493	molecular_function:calcium ion binding(GO:0005509);cellular_component:extracellular region(GO:0005576);cellular_component:integral component of plasma membrane(GO:0005887);biological_process:cell adhesion(GO:0007155);biological_process:homophilic cell adhesion via plasma membrane adhesion molecules(GO:0007156);biological_process:nervous system development(GO:0007399)
ENSG00000252901	-3.05515	-2.59355	0.274957	1	AL669914.1	_	_
ENSG00000204544	-3.05515	-2.59355	0.274957	1	MUC21	K09228	cellular_component:Golgi lumen(GO:0005796);cellular_component:plasma membrane(GO:0005886);cellular_component:integral component of membrane(GO:0016021);biological_process:O-glycan processing(GO:0016266);biological_process:post-translational protein modification(GO:0043687);biological_process:cellular protein metabolic process(GO:0044267)
ENSG00000206875	-3.05515	-2.59355	0.274957	1	RNU6-761P	_	_
ENSG00000207180	-3.05515	-2.59355	0.274957	1	RNU6-411P	_	_
ENSG00000238420	-3.05515	-2.59355	0.274957	1	RNU6-437P	_	_
ENSG00000218428	-3.05515	-2.59355	0.274957	1	NIP7P3	K07565	_
ENSG00000271265	-3.05515	-2.59355	0.274957	1	RP11-230C9.4	_	_
ENSG00000223813	-3.05515	-2.59355	0.274957	1	AC007255.8	_	_
ENSG00000160868	-3.05515	-2.59355	0.274957	1	CYP3A4	K17689	molecular_function:monooxygenase activity(GO:0004497);molecular_function:steroid binding(GO:0005496);molecular_function:iron ion binding(GO:0005506);cellular_component:cytoplasm(GO:0005737);cellular_component:endoplasmic reticulum membrane(GO:0005789);biological_process:lipid metabolic process(GO:0006629);biological_process:steroid catabolic process(GO:0006706);biological_process:xenobiotic metab…
ENSG00000220982	-3.05515	-2.59355	0.274957	1	AC009784.1	_	_
ENSG00000106123	-3.05515	-2.59355	0.274957	1	EPHB6	K05114	molecular_function:protein kinase activity(GO:0004672);molecular_function:receptor activity(GO:0004872);molecular_function:ephrin receptor activity(GO:0005003);molecular_function:ATP binding(GO:0005524);cellular_component:extracellular region(GO:0005576);cellular_component:integral component of plasma membrane(GO:0005887);cellular_component:integral component of membrane(GO:0016021);biological_pr…
ENSG00000253230	-3.05515	-2.59355	0.274957	1	LINC00599	_	_
ENSG00000154316	-3.05515	-2.59355	0.274957	1	TDH	K15789	molecular_function:catalytic activity(GO:0003824);cellular_component:mitochondrion(GO:0005739);biological_process:cellular metabolic process(GO:0044237);molecular_function:coenzyme binding(GO:0050662)
ENSG00000172817	-3.05515	-2.59355	0.274957	1	CYP7B1	K07430	molecular_function:iron ion binding(GO:0005506);cellular_component:endoplasmic reticulum membrane(GO:0005789);biological_process:bile acid biosynthetic process(GO:0006699);biological_process:xenobiotic metabolic process(GO:0006805);biological_process:cholesterol metabolic process(GO:0008203);biological_process:bile acid metabolic process(GO:0008206);biological_process:cell death(GO:0008219);molec…
ENSG00000244230	-3.05515	-2.59355	0.274957	1	RN7SL151P	_	_
ENSG00000185972	-3.05515	-2.59355	0.274957	1	CCIN	_	molecular_function:structural constituent of cytoskeleton(GO:0005200);cellular_component:cytoskeleton(GO:0005856);biological_process:multicellular organismal development(GO:0007275);biological_process:spermatogenesis(GO:0007283);biological_process:cell differentiation(GO:0030154);cellular_component:cytoskeletal calyx(GO:0033150)
ENSG00000176007	-3.05515	-2.59355	0.274957	1	FAM220BP	_	_
ENSG00000229541	-3.05515	-2.59355	0.274957	1	GAPDHP26	K00134	_
ENSG00000148408	-3.05515	-2.59355	0.274957	1	CACNA1B	K04849	molecular_function:voltage-gated calcium channel activity(GO:0005245);molecular_function:calcium ion binding(GO:0005509);molecular_function:protein binding(GO:0005515);molecular_function:ATP binding(GO:0005524);cellular_component:plasma membrane(GO:0005886);cellular_component:voltage-gated calcium channel complex(GO:0005891);biological_process:transport(GO:0006810);biological_process:synaptic tra…
ENSG00000236187	-3.05515	-2.59355	0.274957	1	GJA6P	K07372	_
ENSG00000069535	-3.05515	-2.59355	0.274957	1	MAOB	K00274	cellular_component:mitochondrial envelope(GO:0005740);cellular_component:mitochondrial outer membrane(GO:0005741);cellular_component:mitochondrial inner membrane(GO:0005743);biological_process:xenobiotic metabolic process(GO:0006805);molecular_function:primary amine oxidase activity(GO:0008131);molecular_function:electron carrier activity(GO:0009055);biological_process:response to toxic substance…
ENSG00000231765	-3.05515	-2.59355	0.274957	1	PPP1R11P2	_	_
ENSG00000147180	-3.05515	-2.59355	0.274957	1	ZNF711	_	molecular_function:DNA binding(GO:0003677);molecular_function:protein binding(GO:0005515);cellular_component:nucleus(GO:0005634);biological_process:transcription, DNA-templated(GO:0006351);biological_process:regulation of transcription, DNA-templated(GO:0006355);molecular_function:sequence-specific DNA binding(GO:0043565);biological_process:positive regulation of transcription, DNA-templated(GO:0…
ENSG00000227083	-3.05515	-2.59355	0.274957	1	L29074.3	_	_
ENSG00000198444	-3.05515	-2.59355	0.274957	1	F8A2	_	_
ENSG00000147160	-3.04184	-0.414571	8.92e-09	3.02e-07	AWAT2	K11156	cellular_component:endoplasmic reticulum membrane(GO:0005789);biological_process:lipid metabolic process(GO:0006629);biological_process:wax biosynthetic process(GO:0010025);cellular_component:integral component of membrane(GO:0016021);molecular_function:transferase activity, transferring acyl groups other than amino-acyl groups(GO:0016747);molecular_function:long-chain-alcohol O-fatty-acyltransfe…
ENSG00000151150	-3.03104	-1.33136	9.78e-05	0.0016176	ANK3	_	biological_process:mitotic cytokinesis(GO:0000281);molecular_function:structural constituent of cytoskeleton(GO:0005200);molecular_function:protein binding(GO:0005515);cellular_component:lysosome(GO:0005764);cellular_component:plasma membrane(GO:0005886);cellular_component:bicellular tight junction(GO:0005923);biological_process:plasma membrane organization(GO:0007009);biological_process:signal t…
ENSG00000270107	-3.02724	0.402672	7.46e-16	5.86e-14	CTD-2306M10.1	_	_
ENSG00000187905	-3.01866	-1.85635	0.013335	0.115317	AC002472.13	K07374	_
ENSG00000185070	-3.00451	-1.85637	0.010119	0.0916319	FLRT2	_	molecular_function:receptor signaling protein activity(GO:0005057);cellular_component:proteinaceous extracellular matrix(GO:0005578);cellular_component:integral component of plasma membrane(GO:0005887);biological_process:cell adhesion(GO:0007155);biological_process:biological_process(GO:0008150);molecular_function:protein binding, bridging(GO:0030674)
ENSG00000253737	-2.98575	-1.85647	0.011356	0.100638	KB-1460A1.3	_	_
ENSG00000231519	-2.98178	-1.85678	0.00814477	0.0765373	AC007285.7	_	_
ENSG00000259579	-2.97796	-1.85698	0.00856493	0.0798249	RP11-66B24.5	_	_
ENSG00000270761	-2.97751	-1.85676	0.00807616	0.0759666	RP11-385F7.1	_	_
ENSG00000265258	-2.97473	-1.85687	0.00857373	0.0798941	MIR4686	_	_
ENSG00000269011	-2.97344	-1.85716	0.00913519	0.0842985	AL050303.1	_	_
ENSG00000232729	-2.95253	-1.85728	0.0186201	0.151731	AC083884.8	_	_
ENSG00000137642	-2.94992	-0.274538	2.55e-09	9.37e-08	SORL1	_	molecular_function:transmembrane signaling receptor activity(GO:0004888);molecular_function:protein binding(GO:0005515);cellular_component:extracellular space(GO:0005615);cellular_component:endosome(GO:0005768);cellular_component:Golgi apparatus(GO:0005794);cellular_component:integral component of plasma membrane(GO:0005887);biological_process:protein targeting(GO:0006605);biological_process:lipi…
ENSG00000197410	-2.94633	-1.85736	0.0198999	0.159953	DCHS2	K16507	molecular_function:calcium ion binding(GO:0005509);cellular_component:plasma membrane(GO:0005886);biological_process:homophilic cell adhesion via plasma membrane adhesion molecules(GO:0007156);cellular_component:integral component of membrane(GO:0016021)
ENSG00000260782	-2.9432	-1.8574	0.0198999	0.159953	RP11-480G7.2	K09040	_
ENSG00000223703	-2.92709	-0.293025	2.14e-09	7.96e-08	AC027612.4	K06522	_
ENSG00000183454	-2.92605	-0.29316	4.29e-09	1.52e-07	GRIN2A	K05209	biological_process:startle response(GO:0001964);biological_process:response to amphetamine(GO:0001975);molecular_function:ionotropic glutamate receptor activity(GO:0004970);molecular_function:N-methyl-D-aspartate selective glutamate receptor activity(GO:0004972);molecular_function:extracellular-glutamate-gated ion channel activity(GO:0005234);molecular_function:calcium channel activity(GO:0005262…
ENSG00000253660	-2.90964	-1.04239	1.41e-05	0.000281457	CTC-353G13.1	_	_
ENSG00000078401	-2.88102	-0.774225	7.82e-07	1.95e-05	EDN1	K16366	biological_process:negative regulation of transcription from RNA polymerase II promoter(GO:0000122);biological_process:prostaglandin biosynthetic process(GO:0001516);biological_process:patterning of blood vessels(GO:0001569);biological_process:response to hypoxia(GO:0001666);biological_process:in utero embryonic development(GO:0001701);biological_process:histamine secretion(GO:0001821);biological…
ENSG00000164742	-2.87061	-1.9155	0.0299725	0.222593	ADCY1	K08041	molecular_function:nucleotide binding(GO:0000166);molecular_function:calmodulin binding(GO:0005516);molecular_function:ATP binding(GO:0005524);cellular_component:nucleus(GO:0005634);cellular_component:plasma membrane(GO:0005886);biological_process:energy reserve metabolic process(GO:0006112);biological_process:cAMP biosynthetic process(GO:0006171);biological_process:water transport(GO:0006833);bi…
ENSG00000235410	-2.86035	-1.91542	0.0299725	0.222593	RP11-397C18.2	_	_
ENSG00000183023	-2.8595	-1.91568	0.0144577	0.123423	SLC8A1	K05849	biological_process:response to hypoxia(GO:0001666);biological_process:embryonic placenta development(GO:0001892);biological_process:regulation of the force of heart contraction(GO:0002026);biological_process:regulation of heart rate(GO:0002027);biological_process:regulation of sodium ion transport(GO:0002028);biological_process:heart morphogenesis(GO:0003007);molecular_function:calcium:sodium ant…
ENSG00000250400	-2.85711	-1.9158	0.0145962	0.124384	LINC00977	_	_
ENSG00000250869	-2.85663	-1.91573	0.0150383	0.127439	RP11-453N18.1	K17985	_
ENSG00000137441	-2.85607	-1.91585	0.0149023	0.12649	FGFBP2	_	cellular_component:extracellular space(GO:0005615);molecular_function:growth factor binding(GO:0019838)
ENSG00000235959	-2.85141	-1.41441	0.00522981	0.0527031	AC009237.17	_	_
ENSG00000197047	-2.84426	-1.9159	0.0175645	0.144676	Z73979.1	_	_
ENSG00000156486	-2.84148	-1.91604	0.0299725	0.222593	KCNS2	K04932	molecular_function:delayed rectifier potassium channel activity(GO:0005251);cellular_component:plasma membrane(GO:0005886);biological_process:synaptic transmission(GO:0007268);cellular_component:voltage-gated potassium channel complex(GO:0008076);biological_process:protein homooligomerization(GO:0051260)
ENSG00000205810	-2.83161	-0.0278412	6.06e-11	2.79e-09	KLRC3	K06541	molecular_function:transmembrane signaling receptor activity(GO:0004888);biological_process:cellular defense response(GO:0006968);cellular_component:integral component of membrane(GO:0016021);molecular_function:carbohydrate binding(GO:0030246)
ENSG00000168263	-2.82652	-1.91599	0.0264272	0.202086	KCNV2	K04935	molecular_function:delayed rectifier potassium channel activity(GO:0005251);cellular_component:plasma membrane(GO:0005886);biological_process:synaptic transmission(GO:0007268);cellular_component:voltage-gated potassium channel complex(GO:0008076);biological_process:protein homooligomerization(GO:0051260)
ENSG00000223749	-2.79989	2.34022	3.65e-42	1.33e-39	MIR503HG	_	_
ENSG00000168634	-2.75896	-1.14388	0.00028492	0.00418633	WFDC13	_	molecular_function:serine-type endopeptidase inhibitor activity(GO:0004867);cellular_component:extracellular region(GO:0005576)
ENSG00000242258	-2.75818	-0.858119	1.56e-05	0.000308118	LINC00996	_	_
ENSG00000225768	-2.7486	-1.14399	0.000452437	0.0063327	RP11-127O4.3	_	_
ENSG00000233370	-2.74627	-1.50119	0.00108658	0.013666	AC092664.1	K16575	_
ENSG00000240541	-2.7435	-1.50095	0.00101048	0.0128147	TM4SF1-AS1	_	_
ENSG00000229140	-2.73944	-0.254884	9.33e-09	3.15e-07	CCDC26	_	_
ENSG00000095752	-2.73705	-1.50151	0.00155245	0.0185733	IL11	K05417	molecular_function:cytokine activity(GO:0005125);molecular_function:interleukin-11 receptor binding(GO:0005142);cellular_component:extracellular region(GO:0005576);cellular_component:extracellular space(GO:0005615);cellular_component:cytoplasm(GO:0005737);biological_process:cell-cell signaling(GO:0007267);molecular_function:growth factor activity(GO:0008083);biological_process:positive regulation…
ENSG00000224776	-2.73637	-1.97665	0.0299725	0.222593	RP11-361A21.1	K02998	_
ENSG00000163283	-2.7358	-1.97685	0.0405619	0.283741	ALPP	K01077	molecular_function:alkaline phosphatase activity(GO:0004035);cellular_component:plasma membrane(GO:0005886);cellular_component:cell surface(GO:0009986);cellular_component:integral component of membrane(GO:0016021);cellular_component:anchored component of membrane(GO:0031225);molecular_function:metal ion binding(GO:0046872)
ENSG00000173838	-2.73139	-1.97688	0.0269375	0.205266	2020-03-10	K10665	molecular_function:zinc ion binding(GO:0008270);biological_process:protein ubiquitination(GO:0016567);molecular_function:ligase activity(GO:0016874)
ENSG00000267462	-2.73009	-1.97684	0.0269365	0.205266	RP11-866E20.3	_	_
ENSG00000272736	-2.72985	-1.97699	0.0296036	0.220532	RP11-799N11.1	_	_
ENSG00000169851	-2.72907	-1.97672	0.0277554	0.210281	PCDH7	K16498	molecular_function:calcium ion binding(GO:0005509);cellular_component:plasma membrane(GO:0005886);cellular_component:integral component of plasma membrane(GO:0005887);biological_process:homophilic cell adhesion via plasma membrane adhesion molecules(GO:0007156);cellular_component:integral component of membrane(GO:0016021)
ENSG00000197251	-2.72638	-1.97681	0.0275047	0.208791	LINC00336	_	_
ENSG00000213303	-2.72604	-1.977	0.0266893	0.203696	CTC-398G3.2	K02951	_
ENSG00000109794	-2.72531	-1.97703	0.0381594	0.271019	FAM149A	_	_
ENSG00000264461	-2.72381	-1.97709	0.0264823	0.202383	RN7SL179P	_	_
ENSG00000273361	-2.71906	-0.887051	6.99e-06	0.000148776	RP11-378A13.2	_	_
ENSG00000257990	-2.71814	-1.97696	0.0383309	0.271904	NF1P4	K08052	_
ENSG00000258279	-2.7155	-0.886979	2.11e-05	0.00040344	LINC00592	_	_
ENSG00000160097	-2.71546	-1.9773	0.03017	0.22383	FNDC5	_	molecular_function:molecular_function(GO:0003674);molecular_function:hormone activity(GO:0005179);cellular_component:extracellular region(GO:0005576);cellular_component:peroxisomal membrane(GO:0005778);cellular_component:endoplasmic reticulum(GO:0005783);cellular_component:plasma membrane(GO:0005886);biological_process:biological_process(GO:0008150);biological_process:response to muscle activity(…
ENSG00000256299	-2.7146	-1.97713	0.0305264	0.225795	RP11-989F5.3	_	_
ENSG00000171873	-2.7129	-1.97737	0.0358861	0.257879	ADRA1D	K04137	biological_process:negative regulation of the force of heart contraction involved in baroreceptor response to increased systemic arterial blood pressure(GO:0001986);biological_process:norepinephrine-epinephrine vasoconstriction involved in regulation of systemic arterial blood pressure(GO:0001994);molecular_function:alpha1-adrenergic receptor activity(GO:0004937);cellular_component:plasma membran…
ENSG00000234520	-2.70971	-1.97733	0.0359343	0.258096	AC018464.3	_	_
ENSG00000249593	-2.70971	-1.97733	0.0359423	0.258122	CTB-46B19.2	_	_
ENSG00000163817	-2.70536	0.743863	6.2e-16	4.91e-14	SLC6A20	K00757	biological_process:amino acid transmembrane transport(GO:0003333);molecular_function:neurotransmitter:sodium symporter activity(GO:0005328);cellular_component:plasma membrane(GO:0005886);cellular_component:integral component of plasma membrane(GO:0005887);biological_process:ion transport(GO:0006811);biological_process:amino acid transport(GO:0006865);molecular_function:amino acid transmembrane tr…
ENSG00000159307	-2.70455	-0.45803	1.74e-07	4.87e-06	SCUBE1	_	molecular_function:calcium ion binding(GO:0005509);cellular_component:extracellular space(GO:0005615);biological_process:inflammatory response(GO:0006954);biological_process:adult heart development(GO:0007512);biological_process:blood coagulation(GO:0007596);biological_process:post-embryonic development(GO:0009791);cellular_component:external side of plasma membrane(GO:0009897);cellular_component…
ENSG00000271237	-2.70259	-1.97746	0.0455619	0.31163	RP11-140C5.3	_	_
ENSG00000238934	-2.69505	-1.97758	0.0455619	0.31163	ACA64	_	_
ENSG00000227475	-2.68796	-1.97735	0.0455619	0.31163	RP11-810B23.1	_	_
ENSG00000174600	-2.67625	-0.14605	2.54e-09	9.35e-08	CMKLR1	K04245	biological_process:skeletal system development(GO:0001501);molecular_function:receptor activity(GO:0004872);molecular_function:G-protein coupled receptor activity(GO:0004930);molecular_function:chemokine receptor activity(GO:0004950);molecular_function:protein binding(GO:0005515);cellular_component:plasma membrane(GO:0005886);cellular_component:integral component of plasma membrane(GO:0005887);bi…
ENSG00000132639	-2.67354	-0.480704	3.54e-07	9.37e-06	SNAP25	K18211	molecular_function:SNARE binding(GO:0000149);biological_process:neurotransmitter uptake(GO:0001504);molecular_function:protein binding(GO:0005515);cellular_component:cytoplasm(GO:0005737);cellular_component:trans-Golgi network(GO:0005802);cellular_component:plasma membrane(GO:0005886);biological_process:energy reserve metabolic process(GO:0006112);biological_process:synaptic transmission(GO:00072…
ENSG00000225720	-2.6728	3.35623	5.39e-84	7.43e-81	RP4-742C19.12	_	_
ENSG00000255819	-2.66357	0.00303227	2.19e-07	6e-06	KLRC4-KLRK1	K06728	_
ENSG00000233143	-2.65445	0.927847	6.53e-19	6.66e-17	AC009492.1	_	_
ENSG00000188833	-2.62876	-1.59315	0.00999913	0.0908377	ENTPD8	K01510	molecular_function:ATP binding(GO:0005524);cellular_component:plasma membrane(GO:0005886);biological_process:nucleoside monophosphate biosynthetic process(GO:0009124);biological_process:nucleoside diphosphate biosynthetic process(GO:0009133);cellular_component:integral component of membrane(GO:0016021);molecular_function:hydrolase activity(GO:0016787);molecular_function:nucleoside-diphosphatase a…
ENSG00000226919	-2.61215	-1.54725	0.0139499	0.119652	RP11-80B9.1	_	_
ENSG00000271784	-2.60362	-2.04079	0.0382238	0.271277	RP1-28H20.3	_	_
ENSG00000100311	-2.58981	-2.04093	0.0309126	0.228199	PDGFB	K17386	cellular_component:Golgi membrane(GO:0000139);biological_process:response to hypoxia(GO:0001666);biological_process:embryonic placenta development(GO:0001892);biological_process:positive regulation of endothelial cell proliferation(GO:0001938);biological_process:monocyte chemotaxis(GO:0002548);biological_process:platelet degranulation(GO:0002576);biological_process:positive regulation of glomerul…
ENSG00000228839	-2.58932	-2.04092	0.0297194	0.221196	RP3-400N23.6	_	_
ENSG00000171246	-2.58741	-2.04088	0.0297141	0.221184	NPTX1	_	biological_process:transport(GO:0006810);biological_process:synaptic transmission(GO:0007268);biological_process:central nervous system development(GO:0007417);cellular_component:transport vesicle(GO:0030133);molecular_function:metal ion binding(GO:0046872);biological_process:axonogenesis involved in innervation(GO:0060385)
ENSG00000179178	-2.58507	-2.69271	0.516638	1	TMEM125	_	molecular_function:molecular_function(GO:0003674);cellular_component:cellular_component(GO:0005575);biological_process:biological_process(GO:0008150);cellular_component:integral component of membrane(GO:0016021)
ENSG00000233514	-2.58507	-2.69271	0.516638	1	RP11-570P14.1	K11087	_
ENSG00000224570	-2.58507	-2.69271	0.516638	1	RP11-430H12.2	K00710	_
ENSG00000143032	-2.58507	-2.69271	0.516638	1	BARHL2	K09360	molecular_function:RNA polymerase II core promoter proximal region sequence-specific DNA binding transcription factor activity involved in positive regulation of transcription(GO:0001077);biological_process:cell fate determination(GO:0001709);biological_process:neuron migration(GO:0001764);cellular_component:nucleus(GO:0005634);biological_process:neuron differentiation(GO:0030182);biological_proc…
ENSG00000198765	-2.58507	-2.69271	0.516638	1	SYCP1	K19533	cellular_component:central element(GO:0000801);cellular_component:transverse filament(GO:0000802);cellular_component:male germ cell nucleus(GO:0001673);molecular_function:DNA binding(GO:0003677);biological_process:synaptonemal complex assembly(GO:0007130);biological_process:reciprocal meiotic recombination(GO:0007131);biological_process:spermatogenesis(GO:0007283);biological_process:regulation of…
ENSG00000203859	-2.58507	-2.69271	0.516638	1	HSD3B2	K00070	molecular_function:3-beta-hydroxy-delta5-steroid dehydrogenase activity(GO:0003854);molecular_function:steroid delta-isomerase activity(GO:0004769);cellular_component:mitochondrial inner membrane(GO:0005743);cellular_component:mitochondrial intermembrane space(GO:0005758);cellular_component:endoplasmic reticulum(GO:0005783);cellular_component:endoplasmic reticulum membrane(GO:0005789);biological_…
ENSG00000168509	-2.58507	-2.69271	0.516638	1	HFE2	K06847	molecular_function:protein binding(GO:0005515);cellular_component:extracellular space(GO:0005615);cellular_component:plasma membrane(GO:0005886);biological_process:axon guidance(GO:0007411);cellular_component:cell surface(GO:0009986);molecular_function:coreceptor activity(GO:0015026);biological_process:BMP signaling pathway(GO:0030509);cellular_component:anchored component of membrane(GO:0031225)…
ENSG00000173285	-2.58507	-2.69271	0.516638	1	OR10K1	K04257	molecular_function:G-protein coupled receptor activity(GO:0004930);molecular_function:olfactory receptor activity(GO:0004984);cellular_component:plasma membrane(GO:0005886);cellular_component:integral component of membrane(GO:0016021)
ENSG00000180433	-2.58507	-2.69271	0.516638	1	OR6K6	K04257	molecular_function:G-protein coupled receptor activity(GO:0004930);molecular_function:olfactory receptor activity(GO:0004984);cellular_component:plasma membrane(GO:0005886);cellular_component:integral component of membrane(GO:0016021)
ENSG00000162738	-2.58507	-2.69271	0.516638	1	VANGL2	K04510	biological_process:establishment of planar polarity(GO:0001736);biological_process:neural tube closure(GO:0001843);biological_process:hair follicle development(GO:0001942);biological_process:heart looping(GO:0001947);biological_process:membranous septum morphogenesis(GO:0003149);biological_process:muscular septum morphogenesis(GO:0003150);biological_process:planar cell polarity pathway involved i…
ENSG00000203747	-2.58507	-2.69271	0.516638	1	FCGR3A	K06463	cellular_component:extracellular region(GO:0005576);cellular_component:plasma membrane(GO:0005886);biological_process:immune response(GO:0006955);cellular_component:external side of plasma membrane(GO:0009897);cellular_component:integral component of membrane(GO:0016021);molecular_function:IgG binding(GO:0019864);biological_process:Fc-gamma receptor signaling pathway involved in phagocytosis(GO:0…
ENSG00000072694	-2.58507	-2.69271	0.516638	1	FCGR2B	K16824	molecular_function:protein binding(GO:0005515);cellular_component:plasma membrane(GO:0005886);biological_process:immune response(GO:0006955);biological_process:signal transduction(GO:0007165);cellular_component:integral component of membrane(GO:0016021);biological_process:modulation by virus of host morphology or physiology(GO:0019048);molecular_function:IgG binding(GO:0019864);biological_process…
ENSG00000265435	-2.58507	-2.69271	0.516638	1	MIR3121	_	_
ENSG00000073756	-2.58507	-2.69271	0.516638	1	PTGS2	K11987	biological_process:prostaglandin biosynthetic process(GO:0001516);biological_process:angiogenesis(GO:0001525);molecular_function:peroxidase activity(GO:0004601);molecular_function:prostaglandin-endoperoxide synthase activity(GO:0004666);cellular_component:nucleus(GO:0005634);cellular_component:cytoplasm(GO:0005737);cellular_component:endoplasmic reticulum membrane(GO:0005789);biological_process:p…
ENSG00000250536	-2.58507	-2.69271	0.516638	1	ABHD17AP3	_	_
ENSG00000237250	-2.58507	-2.69271	0.516638	1	RP11-193H5.1	_	_
ENSG00000227821	-2.58507	-2.69271	0.516638	1	AL392086.1	_	_
ENSG00000234814	-2.58507	-2.69271	0.516638	1	SVILP1	K10369	_
ENSG00000150201	-2.58507	-2.69271	0.516638	1	FXYD4	K13359	molecular_function:potassium channel activity(GO:0005267);cellular_component:plasma membrane(GO:0005886);cellular_component:integral component of membrane(GO:0016021);biological_process:ion transmembrane transport(GO:0034220);molecular_function:ATPase binding(GO:0051117);biological_process:transmembrane transport(GO:0055085)
ENSG00000221272	-2.58507	-2.69271	0.516638	1	AC067742.1	_	_
ENSG00000227583	-2.58507	-2.69271	0.516638	1	RP11-119F7.3	K02984	_
ENSG00000138308	-2.58507	-2.69271	0.516638	1	PLA2G12B	K01047	molecular_function:phospholipase A2 activity(GO:0004623);molecular_function:calcium ion binding(GO:0005509);cellular_component:extracellular region(GO:0005576);biological_process:lipid catabolic process(GO:0016042)
ENSG00000184923	-2.58507	-2.69271	0.516638	1	NUTM2A	_	_
ENSG00000138135	-2.58507	-2.69271	0.516638	1	CH25H	K10223	molecular_function:cholesterol 25-hydroxylase activity(GO:0001567);molecular_function:iron ion binding(GO:0005506);cellular_component:endoplasmic reticulum membrane(GO:0005789);cellular_component:cytosol(GO:0005829);biological_process:lipid metabolic process(GO:0006629);biological_process:fatty acid biosynthetic process(GO:0006633);biological_process:bile acid biosynthetic process(GO:0006699);bio…
ENSG00000095585	-2.58507	-2.69271	0.516638	1	BLNK	K07371	molecular_function:transmembrane receptor protein tyrosine kinase adaptor activity(GO:0005068);molecular_function:SH3/SH2 adaptor activity(GO:0005070);molecular_function:protein binding(GO:0005515);cellular_component:intracellular(GO:0005622);cellular_component:cytosol(GO:0005829);cellular_component:plasma membrane(GO:0005886);biological_process:inflammatory response(GO:0006954);biological_proces…
ENSG00000148798	-2.58507	-2.69271	0.516638	1	INA	K07608	molecular_function:structural constituent of cytoskeleton(GO:0005200);cellular_component:neurofilament(GO:0005883);biological_process:nervous system development(GO:0007399);biological_process:cell differentiation(GO:0030154);biological_process:neurofilament cytoskeleton organization(GO:0060052)
ENSG00000165862	-2.58507	-2.69271	0.516638	1	PNLIPRP2	K14075	molecular_function:phospholipase activity(GO:0004620);molecular_function:triglyceride lipase activity(GO:0004806);molecular_function:calcium ion binding(GO:0005509);cellular_component:extracellular region(GO:0005576);cellular_component:extracellular space(GO:0005615);biological_process:lipid metabolic process(GO:0006629);biological_process:triglyceride metabolic process(GO:0006641);biological_pro…
ENSG00000237675	-2.58507	-2.69271	0.516638	1	TEX36-AS1	_	_
ENSG00000188076	-2.58507	-2.69271	0.516638	1	SCGB1C1	_	cellular_component:extracellular region(GO:0005576)
ENSG00000175520	-2.58507	-2.69271	0.516638	1	UBQLN3	K04523	_
ENSG00000182255	-2.58507	-2.69271	0.516638	1	KCNA4	_	molecular_function:voltage-gated potassium channel activity(GO:0005249);molecular_function:delayed rectifier potassium channel activity(GO:0005251);molecular_function:protein binding(GO:0005515);cellular_component:plasma membrane(GO:0005886);biological_process:potassium ion transport(GO:0006813);biological_process:synaptic transmission(GO:0007268);cellular_component:voltage-gated potassium channe…
ENSG00000066336	-2.58507	-2.69271	0.516638	1	SPI1	K09438	biological_process:negative regulation of transcription from RNA polymerase II promoter(GO:0000122);cellular_component:nuclear chromatin(GO:0000790);molecular_function:RNA polymerase II distal enhancer sequence-specific DNA binding(GO:0000980);molecular_function:core promoter binding(GO:0001047);molecular_function:RNA polymerase II transcription factor binding(GO:0001085);molecular_function:RNA p…
ENSG00000181761	-2.58507	-2.69271	0.516638	1	OR8H3	K04257	molecular_function:G-protein coupled receptor activity(GO:0004930);molecular_function:olfactory receptor activity(GO:0004984);cellular_component:plasma membrane(GO:0005886);cellular_component:integral component of membrane(GO:0016021)
ENSG00000174942	-2.58507	-2.69271	0.516638	1	OR5R1	K04257	molecular_function:G-protein coupled receptor activity(GO:0004930);molecular_function:olfactory receptor activity(GO:0004984);cellular_component:plasma membrane(GO:0005886);cellular_component:integral component of membrane(GO:0016021)
ENSG00000156738	-2.58507	-2.69271	0.516638	1	MS4A1	K06466	cellular_component:nucleolus(GO:0005730);cellular_component:plasma membrane(GO:0005886);cellular_component:integral component of plasma membrane(GO:0005887);biological_process:immune response(GO:0006955);cellular_component:external side of plasma membrane(GO:0009897);cellular_component:integral component of membrane(GO:0016021);biological_process:B cell activation(GO:0042113)
ENSG00000256280	-2.58507	-2.69271	0.516638	1	RP11-466C23.5	K02140	_
ENSG00000162344	-2.58507	-2.69271	0.516638	1	FGF19	K04358	biological_process:neural crest cell migration(GO:0001755);molecular_function:fibroblast growth factor receptor binding(GO:0005104);molecular_function:protein binding(GO:0005515);cellular_component:extracellular region(GO:0005576);biological_process:epidermal growth factor receptor signaling pathway(GO:0007173);biological_process:nervous system development(GO:0007399);biological_process:heart dev…
ENSG00000241233	-2.58507	-2.69271	0.516638	1	KRTAP5-8	_	cellular_component:extracellular region(GO:0005576);biological_process:biological_process(GO:0008150);molecular_function:structural constituent of epidermis(GO:0030280);cellular_component:keratin filament(GO:0045095)
ENSG00000149295	-2.58507	-2.69271	0.516638	1	DRD2	K04145	molecular_function:dopamine neurotransmitter receptor activity, coupled via Gi/Go(GO:0001591);biological_process:temperature homeostasis(GO:0001659);biological_process:response to hypoxia(GO:0001666);cellular_component:acrosomal vesicle(GO:0001669);biological_process:synaptic transmission, dopaminergic(GO:0001963);biological_process:response to amphetamine(GO:0001975);biological_process:neurologi…
ENSG00000109943	-2.58507	-2.69271	0.516638	1	CRTAM	K16361	biological_process:T cell mediated cytotoxicity(GO:0001913);biological_process:detection of tumor cell(GO:0002355);biological_process:positive regulation of natural killer cell mediated cytotoxicity directed against tumor cell target(GO:0002860);molecular_function:receptor binding(GO:0005102);cellular_component:plasma membrane(GO:0005886);biological_process:cell recognition(GO:0008037);cellular_c…
ENSG00000254467	-2.58507	-2.69271	0.516638	1	RP11-634B22.4	_	_
ENSG00000234560	-2.58507	-2.69271	0.516638	1	OR10G8	K04257	molecular_function:G-protein coupled receptor activity(GO:0004930);molecular_function:olfactory receptor activity(GO:0004984);cellular_component:plasma membrane(GO:0005886);cellular_component:integral component of membrane(GO:0016021)
ENSG00000080854	-2.58507	-2.69271	0.516638	1	IGSF9B	_	cellular_component:plasma membrane(GO:0005886);cellular_component:integral component of membrane(GO:0016021)
ENSG00000239701	-2.58507	-2.69271	0.516638	1	RP3-461F17.1	_	_
ENSG00000256400	-2.58507	-2.69271	0.516638	1	RP11-673D15.7	_	_
ENSG00000256283	-2.58507	-2.69271	0.516638	1	RP11-365O10.1	_	_
ENSG00000121351	-2.58507	-2.69271	0.516638	1	IAPP	K08039	molecular_function:receptor binding(GO:0005102);molecular_function:hormone activity(GO:0005179);cellular_component:extracellular region(GO:0005576);cellular_component:extracellular space(GO:0005615);biological_process:apoptotic process(GO:0006915);biological_process:signal transduction(GO:0007165);biological_process:cell-cell signaling(GO:0007267);biological_process:sensory perception of pain(GO:…
ENSG00000255745	-2.58507	-2.69271	0.516638	1	RP11-625L16.1	_	_
ENSG00000152936	-2.58507	-2.69271	0.516638	1	IFLTD1	_	molecular_function:structural molecule activity(GO:0005198);cellular_component:nuclear envelope(GO:0005635);cellular_component:cytoplasm(GO:0005737);cellular_component:intermediate filament(GO:0005882);biological_process:cell proliferation(GO:0008283)
ENSG00000139209	-2.58507	-2.69271	0.516638	1	SLC38A4	K14991	cellular_component:plasma membrane(GO:0005886);biological_process:ion transport(GO:0006811);biological_process:sodium ion transport(GO:0006814);biological_process:amino acid transport(GO:0006865);molecular_function:amino acid transmembrane transporter activity(GO:0015171);molecular_function:symporter activity(GO:0015293);cellular_component:integral component of membrane(GO:0016021);biological_pro…
ENSG00000170454	-2.58507	-2.69271	0.516638	1	KRT75	K07605	molecular_function:structural molecule activity(GO:0005198);cellular_component:keratin filament(GO:0045095)
ENSG00000135426	-2.58507	-2.69271	0.516638	1	TESPA1	_	cellular_component:cytoplasm(GO:0005737);cellular_component:COP9 signalosome(GO:0008180);biological_process:COP9 signalosome assembly(GO:0010387);biological_process:positive regulation of T cell differentiation in thymus(GO:0033089);biological_process:positive regulation of T cell receptor signaling pathway(GO:0050862)
ENSG00000175398	-2.58507	-2.69271	0.516638	1	OR10P1	K04257	molecular_function:G-protein coupled receptor activity(GO:0004930);molecular_function:olfactory receptor activity(GO:0004984);cellular_component:plasma membrane(GO:0005886);cellular_component:integral component of membrane(GO:0016021)
ENSG00000257005	-2.58507	-2.69271	0.516638	1	RP11-972L6.2	_	_
ENSG00000257613	-2.58507	-2.69271	0.516638	1	RP11-320P7.1	_	_
ENSG00000257053	-2.58507	-2.69271	0.516638	1	Z98941.1	_	_
ENSG00000228741	-2.58507	-2.69271	0.516638	1	RP11-309I15.1	_	_
ENSG00000226665	-2.58507	-2.69271	0.516638	1	SSR1P2	_	_
ENSG00000231981	-2.58507	-2.69271	0.516638	1	RPL7L1P12	_	_
ENSG00000129465	-2.58507	-2.69271	0.516638	1	RIPK3	K08847	biological_process:toll-like receptor signaling pathway(GO:0002224);biological_process:MyD88-independent toll-like receptor signaling pathway(GO:0002756);molecular_function:transcription coactivator activity(GO:0003713);molecular_function:protein kinase activity(GO:0004672);molecular_function:protein serine/threonine kinase activity(GO:0004674);molecular_function:NF-kappaB-inducing kinase activit…
ENSG00000139910	-2.58507	-2.69271	0.516638	1	NOVA1	K14944	biological_process:mRNA splicing, via spliceosome(GO:0000398);molecular_function:RNA binding(GO:0003723);molecular_function:mRNA binding(GO:0003729);cellular_component:nucleus(GO:0005634);biological_process:RNA processing(GO:0006396);biological_process:synaptic transmission(GO:0007268);biological_process:locomotory behavior(GO:0007626);biological_process:RNA splicing(GO:0008380)
ENSG00000258474	-2.58507	-2.69271	0.516638	1	RP11-187E13.1	_	_
ENSG00000189139	-2.58507	-2.69271	0.516638	1	FSCB	_	molecular_function:calcium ion binding(GO:0005509);cellular_component:cilium(GO:0005929);biological_process:peptidyl-serine phosphorylation(GO:0018105)
ENSG00000235269	-2.58507	-2.69271	0.516638	1	AL162759.1	_	_
ENSG00000258413	-2.58507	-2.69271	0.516638	1	RP11-665C16.6	_	_
ENSG00000184302	-2.58507	-2.69271	0.516638	1	SIX6	K19473	molecular_function:sequence-specific DNA binding transcription factor activity(GO:0003700);cellular_component:nucleus(GO:0005634);biological_process:visual perception(GO:0007601);biological_process:organ morphogenesis(GO:0009887);molecular_function:sequence-specific DNA binding(GO:0043565)
ENSG00000258485	-2.58507	-2.69271	0.516638	1	SRMP2	K00797	_
ENSG00000182107	-2.58507	-2.69271	0.516638	1	TMEM30B	_	molecular_function:protein binding(GO:0005515);cellular_component:integral component of membrane(GO:0016021);biological_process:positive regulation of protein exit from endoplasmic reticulum(GO:0070863)
ENSG00000251533	-2.58507	-2.69271	0.516638	1	LINC00605	_	_
ENSG00000211968	-2.58507	-2.69271	0.516638	1	IGHV1-58	K06856	_
ENSG00000265322	-2.58507	-2.69271	0.516638	1	MIR3118-6	_	_
ENSG00000166206	-2.58507	-2.69271	0.516638	1	GABRB3	K05181	molecular_function:GABA-A receptor activity(GO:0004890);molecular_function:extracellular ligand-gated ion channel activity(GO:0005230);molecular_function:chloride channel activity(GO:0005254);cellular_component:plasma membrane(GO:0005886);cellular_component:integral component of plasma membrane(GO:0005887);biological_process:transport(GO:0006810);biological_process:ion transport(GO:0006811);biolo…
ENSG00000221096	-2.58507	-2.69271	0.516638	1	AC092757.1	_	_
ENSG00000221476	-2.58507	-2.69271	0.516638	1	MIR1827	_	_
ENSG00000270919	-2.58507	-2.69271	0.516638	1	RP11-379K22.3	_	_
ENSG00000259404	-2.58507	-2.69271	0.516638	1	EFTUD1P1	K14536	_
ENSG00000259544	-2.58507	-2.69271	0.516638	1	RP11-158M2.2	_	_
ENSG00000140519	-2.58507	-2.69271	0.516638	1	RHCG	K06580	cellular_component:plasma membrane(GO:0005886);cellular_component:integral component of plasma membrane(GO:0005887);biological_process:cellular ion homeostasis(GO:0006873);biological_process:regulation of pH(GO:0006885);molecular_function:ammonium transmembrane transporter activity(GO:0008519);biological_process:ammonium transport(GO:0015696);biological_process:amine transport(GO:0015837);cellula…
ENSG00000258551	-2.58507	-2.69271	0.516638	1	RP11-661P17.1	_	_
ENSG00000260710	-2.58507	-2.69271	0.516638	1	RP11-616M22.7	_	_
ENSG00000238964	-2.58507	-2.69271	0.516638	1	RNU7-125P	_	_
ENSG00000207042	-2.58507	-2.69271	0.516638	1	RNU6-196P	_	_
ENSG00000216671	-2.58507	-2.69271	0.516638	1	CCNYL3	K18468	_
ENSG00000259803	-2.58507	-2.69271	0.516638	1	SLC22A31	_	biological_process:ion transport(GO:0006811);cellular_component:integral component of membrane(GO:0016021);molecular_function:transmembrane transporter activity(GO:0022857)
ENSG00000227158	-2.58507	-2.69271	0.516638	1	AC073621.2	K10692	_
ENSG00000181291	-2.58507	-2.69271	0.516638	1	TMEM132E	K17599	cellular_component:integral component of membrane(GO:0016021)
ENSG00000242429	-2.58507	-2.69271	0.516638	1	RP11-19G24.2	_	_
ENSG00000186393	-2.58507	-2.69271	0.516638	1	KRT26	K07604	molecular_function:structural molecule activity(GO:0005198);cellular_component:intermediate filament(GO:0005882)
ENSG00000176160	-2.58507	-2.69271	0.516638	1	HSF5	_	molecular_function:sequence-specific DNA binding transcription factor activity(GO:0003700);cellular_component:nucleus(GO:0005634);biological_process:transcription, DNA-templated(GO:0006351);molecular_function:sequence-specific DNA binding(GO:0043565)
ENSG00000251698	-2.58507	-2.69271	0.516638	1	RNA5SP445	_	_
ENSG00000226101	-2.58507	-2.69271	0.516638	1	AC007461.2	_	_
ENSG00000206713	-2.58507	-2.69271	0.516638	1	Y_RNA	_	_
ENSG00000177143	-2.58507	-2.69271	0.516638	1	CETN1	K16465	cellular_component:spindle pole(GO:0000922);molecular_function:nucleic acid binding(GO:0003676);molecular_function:calcium ion binding(GO:0005509);molecular_function:protein binding(GO:0005515);molecular_function:ATP binding(GO:0005524);cellular_component:cytoplasm(GO:0005737);cellular_component:centrosome(GO:0005813);biological_process:mitotic nuclear division(GO:0007067);molecular_function:micr…
ENSG00000267136	-2.58507	-2.69271	0.516638	1	RP11-53B2.3	_	_
ENSG00000199357	-2.58507	-2.69271	0.516638	1	Y_RNA	_	_
ENSG00000267620	-2.58507	-2.69271	0.516638	1	RP11-795H16.2	K03141	_
ENSG00000265261	-2.58507	-2.69271	0.516638	1	RP11-162A12.3	K14288	_
ENSG00000263997	-2.58507	-2.69271	0.516638	1	AC006130.1	_	_
ENSG00000252408	-2.58507	-2.69271	0.516638	1	SNORD38	_	_
ENSG00000167664	-2.58507	-2.69271	0.516638	1	TMIGD2	K16668	cellular_component:plasma membrane(GO:0005886);cellular_component:integral component of membrane(GO:0016021)
ENSG00000263409	-2.58507	-2.69271	0.516638	1	MIR4747	_	_
ENSG00000142303	-2.58507	-2.69271	0.516638	1	ADAMTS10	K08625	cellular_component:microfibril(GO:0001527);molecular_function:molecular_function(GO:0003674);molecular_function:metalloendopeptidase activity(GO:0004222);molecular_function:protein binding(GO:0005515);cellular_component:cellular_component(GO:0005575);cellular_component:proteinaceous extracellular matrix(GO:0005578);biological_process:proteolysis(GO:0006508);biological_process:biological_process(G…
ENSG00000179913	-2.58507	-2.69271	0.516638	1	B3GNT3	K07970	cellular_component:Golgi membrane(GO:0000139);cellular_component:Golgi apparatus(GO:0005794);cellular_component:integral component of plasma membrane(GO:0005887);biological_process:carbohydrate metabolic process(GO:0005975);biological_process:protein glycosylation(GO:0006486);molecular_function:galactosyltransferase activity(GO:0008378);cellular_component:membrane(GO:0016020);cellular_component:i…
ENSG00000268560	-2.58507	-2.69271	0.516638	1	CTD-2332E11.2	_	_
ENSG00000268100	-2.58507	-2.69271	0.516638	1	ZNF725P	K09228	_
ENSG00000225868	-2.58507	-2.69271	0.516638	1	AC016582.2	_	_
ENSG00000268055	-2.58507	-2.69271	0.516638	1	AC067969.2	_	_
ENSG00000170956	-2.58507	-2.69271	0.516638	1	CEACAM3	K06499	cellular_component:integral component of membrane(GO:0016021)
ENSG00000124440	-2.58507	-2.69271	0.516638	1	HIF3A	K09096	biological_process:response to hypoxia(GO:0001666);molecular_function:DNA binding(GO:0003677);molecular_function:sequence-specific DNA binding transcription factor activity(GO:0003700);molecular_function:signal transducer activity(GO:0004871);cellular_component:nucleus(GO:0005634);cellular_component:nucleoplasm(GO:0005654);cellular_component:cytoplasm(GO:0005737);cellular_component:cytosol(GO:000…
ENSG00000134830	-2.58507	-2.69271	0.516638	1	C5AR2	K04171	molecular_function:C5a anaphylatoxin receptor activity(GO:0004944);molecular_function:N-formyl peptide receptor activity(GO:0004982);molecular_function:protein binding(GO:0005515);cellular_component:cellular_component(GO:0005575);cellular_component:plasma membrane(GO:0005886);biological_process:chemotaxis(GO:0006935);biological_process:biological_process(GO:0008150);cellular_component:basal plasm…
ENSG00000142515	-2.58507	-2.69271	0.516638	1	KLK3	K01325	molecular_function:serine-type endopeptidase activity(GO:0004252);molecular_function:protein binding(GO:0005515);cellular_component:extracellular region(GO:0005576);biological_process:proteolysis(GO:0006508);molecular_function:serine-type peptidase activity(GO:0008236);biological_process:negative regulation of angiogenesis(GO:0016525);biological_process:cellular protein metabolic process(GO:00442…
ENSG00000255441	-2.58507	-2.69271	0.516638	1	CTD-2616J11.2	_	_
ENSG00000258405	-2.58507	-2.69271	0.516638	1	ZNF578	K09228	molecular_function:nucleic acid binding(GO:0003676);molecular_function:DNA binding(GO:0003677);cellular_component:intracellular(GO:0005622);cellular_component:nucleus(GO:0005634);biological_process:transcription, DNA-templated(GO:0006351);biological_process:regulation of transcription, DNA-templated(GO:0006355);molecular_function:metal ion binding(GO:0046872)
ENSG00000130433	-2.58507	-2.69271	0.516638	1	CACNG6	K04871	molecular_function:voltage-gated calcium channel activity(GO:0005245);cellular_component:voltage-gated calcium channel complex(GO:0005891);biological_process:calcium ion transport(GO:0006816);cellular_component:membrane(GO:0016020)
ENSG00000105609	-2.58507	-2.69271	0.516638	1	LILRB5	K06512	molecular_function:transmembrane signaling receptor activity(GO:0004888);biological_process:defense response(GO:0006952);biological_process:cell surface receptor signaling pathway(GO:0007166);cellular_component:integral component of membrane(GO:0016021)
ENSG00000167633	-2.58507	-2.69271	0.516638	1	KIR3DL1	K07980	cellular_component:plasma membrane(GO:0005886);cellular_component:integral component of plasma membrane(GO:0005887);biological_process:immune response(GO:0006955);molecular_function:HLA-B specific inhibitory MHC class I receptor activity(GO:0030109);biological_process:regulation of immune response(GO:0050776)
ENSG00000189013	-2.58507	-2.69271	0.516638	1	KIR2DL4	K07981	molecular_function:transmembrane signaling receptor activity(GO:0004888);molecular_function:protein binding(GO:0005515);cellular_component:plasma membrane(GO:0005886);cellular_component:integral component of plasma membrane(GO:0005887);biological_process:cellular defense response(GO:0006968);biological_process:signal transduction(GO:0007165);biological_process:regulation of immune response(GO:005…
ENSG00000267110	-2.58507	-2.69271	0.516638	1	CTD-2587H24.4	K12044	_
ENSG00000179709	-2.58507	-2.69271	0.516638	1	NLRP8	_	molecular_function:ATP binding(GO:0005524);cellular_component:cytoplasm(GO:0005737)
ENSG00000266932	-2.58507	-2.69271	0.516638	1	AC006116.13	K18159	_
ENSG00000141946	-2.58507	-2.69271	0.516638	1	ZIM3	K09228	molecular_function:DNA binding(GO:0003677);cellular_component:nucleus(GO:0005634);biological_process:transcription, DNA-templated(GO:0006351);biological_process:regulation of transcription, DNA-templated(GO:0006355);molecular_function:metal ion binding(GO:0046872)
ENSG00000224661	-2.58507	-2.69271	0.516638	1	AC010907.5	_	_
ENSG00000157833	-2.58507	-2.69271	0.516638	1	GAREML	_	_
ENSG00000163793	-2.58507	-2.69271	0.516638	1	DNAJC5G	K09525	cellular_component:membrane(GO:0016020)
ENSG00000235064	-2.58507	-2.69271	0.516638	1	SLC25A5P2	K05863	_
ENSG00000252281	-2.58507	-2.69271	0.516638	1	snoZ247	_	_
ENSG00000231334	-2.58507	-2.69271	0.516638	1	AC104781.1	_	_
ENSG00000226505	-2.58507	-2.69271	0.516638	1	AC016700.3	_	_
ENSG00000200890	-2.58507	-2.69271	0.516638	1	RNA5SP99	_	_
ENSG00000233205	-2.58507	-2.69271	0.516638	1	AC108479.2	_	_
ENSG00000229195	-2.58507	-2.69271	0.516638	1	AC009495.4	_	_
ENSG00000144410	-2.58507	-2.69271	0.516638	1	CPO	_	molecular_function:metallocarboxypeptidase activity(GO:0004181);cellular_component:extracellular region(GO:0005576);biological_process:proteolysis(GO:0006508);molecular_function:zinc ion binding(GO:0008270)
ENSG00000263828	-2.58507	-2.69271	0.516638	1	MIR4439	_	_
ENSG00000229172	-2.58507	-2.69271	0.516638	1	AC073065.3	K04613	_
ENSG00000244122	-2.58507	-2.69271	0.516638	1	UGT1A7	K00699	molecular_function:retinoic acid binding(GO:0001972);molecular_function:enzyme inhibitor activity(GO:0004857);molecular_function:protein kinase C binding(GO:0005080);cellular_component:endoplasmic reticulum(GO:0005783);cellular_component:endoplasmic reticulum membrane(GO:0005789);biological_process:excretion(GO:0007588);molecular_function:drug binding(GO:0008144);biological_process:coumarin metab…
ENSG00000220256	-2.58507	-2.69271	0.516638	1	AC093802.1	K06115	_
ENSG00000125895	-2.58507	-2.69271	0.516638	1	TMEM74B	_	cellular_component:integral component of membrane(GO:0016021)
ENSG00000271426	-2.58507	-2.69271	0.516638	1	RP4-718P11.1	_	_
ENSG00000225069	-2.58507	-2.69271	0.516638	1	RP5-1025A1.2	K06747	_
ENSG00000234139	-2.58507	-2.69271	0.516638	1	RP4-550H1.4	_	_
ENSG00000101074	-2.58507	-2.69271	0.516638	1	R3HDML	_	cellular_component:extracellular region(GO:0005576);molecular_function:peptidase inhibitor activity(GO:0030414)
ENSG00000221385	-2.58507	-2.69271	0.516638	1	AL354984.2	_	_
ENSG00000166265	-2.58507	-2.69271	0.516638	1	CYYR1	_	molecular_function:molecular_function(GO:0003674);biological_process:biological_process(GO:0008150);cellular_component:integral component of membrane(GO:0016021)
ENSG00000221864	-2.58507	-2.69271	0.516638	1	KRTAP12-2	_	cellular_component:keratin filament(GO:0045095)
ENSG00000223553	-2.58507	-2.69271	0.516638	1	SMPD4P1	K12353	_
ENSG00000178026	-2.58507	-2.69271	0.516638	1	FAM211B	_	_
ENSG00000056487	-2.58507	-2.69271	0.516638	1	PHF21B	_	molecular_function:zinc ion binding(GO:0008270)
ENSG00000222348	-2.58507	-2.69271	0.516638	1	RNU6-814P	_	_
ENSG00000157150	-2.58507	-2.69271	0.516638	1	TIMP4	_	cellular_component:extracellular region(GO:0005576);cellular_component:extracellular space(GO:0005615);biological_process:central nervous system development(GO:0007417);biological_process:biological_process(GO:0008150);molecular_function:metalloendopeptidase inhibitor activity(GO:0008191);cellular_component:sarcomere(GO:0030017);biological_process:response to lipopolysaccharide(GO:0032496);biolog…
ENSG00000223513	-2.58507	-2.69271	0.516638	1	ATP6V0E1P2	K02153	_
ENSG00000160791	-2.58507	-2.69271	0.516638	1	CCR5	K04180	biological_process:MAPK cascade(GO:0000165);biological_process:dendritic cell chemotaxis(GO:0002407);molecular_function:actin binding(GO:0003779);molecular_function:phosphatidylinositol phospholipase C activity(GO:0004435);molecular_function:chemokine receptor activity(GO:0004950);molecular_function:protein binding(GO:0005515);cellular_component:cytoplasm(GO:0005737);cellular_component:endosome(G…
ENSG00000229453	-2.58507	-2.69271	0.516638	1	SPINK8	_	molecular_function:serine-type endopeptidase inhibitor activity(GO:0004867);cellular_component:extracellular region(GO:0005576)
ENSG00000189196	-2.58507	-2.69271	0.516638	1	LINC00994	_	_
ENSG00000242728	-2.58507	-2.69271	0.516638	1	UQCRHP4	K00416	_
ENSG00000163519	-2.58507	-2.69271	0.516638	1	TRAT1	_	biological_process:negative regulation of receptor recycling(GO:0001920);molecular_function:transmembrane receptor protein tyrosine kinase adaptor activity(GO:0005068);cellular_component:plasma membrane(GO:0005886);cellular_component:integral component of plasma membrane(GO:0005887);biological_process:cellular defense response(GO:0006968);biological_process:signal transduction(GO:0007165);biologi…
ENSG00000250174	-2.58507	-2.69271	0.516638	1	MYLK-AS2	_	_
ENSG00000241947	-2.58507	-2.69271	0.516638	1	HNRNPA1P24	K12741	_
ENSG00000182447	-2.58507	-2.69271	0.516638	1	OTOL1	_	cellular_component:collagen trimer(GO:0005581)
ENSG00000236686	-2.58507	-2.69271	0.516638	1	BZW1P1	_	_
ENSG00000252082	-2.58507	-2.69271	0.516638	1	RNU6-547P	_	_
ENSG00000224652	-2.58507	-2.69271	0.516638	1	LINC00885	_	_
ENSG00000109684	-2.58507	-2.69271	0.516638	1	CLNK	K15696	molecular_function:SH3/SH2 adaptor activity(GO:0005070);cellular_component:intracellular(GO:0005622);biological_process:immune response(GO:0006955);biological_process:transmembrane receptor protein tyrosine kinase signaling pathway(GO:0007169);biological_process:intracellular signal transduction(GO:0035556)
ENSG00000250057	-2.58507	-2.69271	0.516638	1	RP11-576N17.5	_	_
ENSG00000164112	-2.58507	-2.69271	0.516638	1	TMEM155	_	cellular_component:extracellular region(GO:0005576)
ENSG00000252951	-2.58507	-2.69271	0.516638	1	RNA5SP165	_	_
ENSG00000171560	-2.58507	-2.69271	0.516638	1	FGA	K03903	biological_process:platelet degranulation(GO:0002576);molecular_function:receptor binding(GO:0005102);molecular_function:protein binding(GO:0005515);cellular_component:extracellular region(GO:0005576);cellular_component:fibrinogen complex(GO:0005577);cellular_component:extracellular space(GO:0005615);cellular_component:plasma membrane(GO:0005886);cellular_component:cell cortex(GO:0005938);biologi…
ENSG00000250622	-2.58507	-2.69271	0.516638	1	RP11-612J15.3	K02915	_
ENSG00000250374	-2.58507	-2.69271	0.516638	1	RP11-219C20.1	K12037	_
ENSG00000272218	-2.58507	-2.69271	0.516638	1	RP11-11N5.3	_	_
ENSG00000205100	-2.58507	-2.69271	0.516638	1	HSP90AA4P	K04079	molecular_function:ATP binding(GO:0005524);cellular_component:cytoplasm(GO:0005737);biological_process:protein folding(GO:0006457);biological_process:response to stress(GO:0006950);molecular_function:unfolded protein binding(GO:0051082)
ENSG00000260763	-2.58507	-2.69271	0.516638	1	RP11-445O3.3	_	_
ENSG00000271043	-2.58507	-2.69271	0.516638	1	MTRNR2L2	K01982	cellular_component:extracellular region(GO:0005576);cellular_component:cytoplasm(GO:0005737)
ENSG00000113525	-2.58507	-2.69271	0.516638	1	IL5	K05428	molecular_function:cytokine activity(GO:0005125);molecular_function:interleukin-5 receptor binding(GO:0005137);molecular_function:protein binding(GO:0005515);cellular_component:extracellular region(GO:0005576);cellular_component:extracellular space(GO:0005615);biological_process:inflammatory response(GO:0006954);biological_process:immune response(GO:0006955);molecular_function:growth factor activ…
ENSG00000207317	-2.58507	-2.69271	0.516638	1	Y_RNA	_	_
ENSG00000200235	-2.58507	-2.69271	0.516638	1	SNORA27	_	_
ENSG00000081842	-2.58507	-2.69271	0.516638	1	PCDHA6	K16493	molecular_function:calcium ion binding(GO:0005509);cellular_component:extracellular region(GO:0005576);cellular_component:integral component of plasma membrane(GO:0005887);biological_process:cell adhesion(GO:0007155);biological_process:homophilic cell adhesion via plasma membrane adhesion molecules(GO:0007156);biological_process:nervous system development(GO:0007399)
ENSG00000230789	-2.58507	-2.69271	0.516638	1	ARHGAP26-IT1	_	_
ENSG00000200161	-2.58507	-2.69271	0.516638	1	RN7SKP145	_	_
ENSG00000145850	-2.58507	-2.69271	0.516638	1	TIMD4	_	cellular_component:integral component of membrane(GO:0016021)
ENSG00000170613	-2.58507	-2.69271	0.516638	1	FAM71B	_	cellular_component:nucleus(GO:0005634);cellular_component:nucleolus(GO:0005730);cellular_component:cytoplasm(GO:0005737)
ENSG00000199035	-2.58507	-2.69271	0.516638	1	MIR103A1	_	_
ENSG00000234511	-2.58507	-2.69271	0.516638	1	C5orf58	_	_
ENSG00000249849	-2.58507	-2.69271	0.516638	1	RP11-1101H11.1	_	_
ENSG00000146039	-2.58507	-2.69271	0.516638	1	SLC17A4	K12300	molecular_function:sodium:phosphate symporter activity(GO:0005436);cellular_component:integral component of plasma membrane(GO:0005887);biological_process:phosphate-containing compound metabolic process(GO:0006796);biological_process:sodium ion transport(GO:0006814);cellular_component:membrane(GO:0016020);cellular_component:integral component of membrane(GO:0016021);biological_process:transmembra…
ENSG00000271440	-2.58507	-2.69271	0.516638	1	RP11-373N24.2	_	_
ENSG00000204632	-2.58507	-2.69271	0.516638	1	HLA-G	K06751	cellular_component:Golgi membrane(GO:0000139);biological_process:positive regulation of T cell mediated cytotoxicity(GO:0001916);biological_process:antigen processing and presentation of peptide antigen via MHC class I(GO:0002474);biological_process:antigen processing and presentation of exogenous peptide antigen via MHC class I, TAP-dependent(GO:0002479);biological_process:antigen processing and…
ENSG00000237080	-2.58507	-2.69271	0.516638	1	EHMT2-AS1	_	_
ENSG00000238716	-2.58507	-2.69271	0.516638	1	AL031905.1	_	_
ENSG00000112782	-2.58507	-2.69271	0.516638	1	CLIC5	K05025	biological_process:diet induced thermogenesis(GO:0002024);molecular_function:voltage-gated chloride channel activity(GO:0005247);molecular_function:protein binding(GO:0005515);cellular_component:Golgi apparatus(GO:0005794);cellular_component:microtubule organizing center(GO:0005815);cellular_component:cell cortex(GO:0005938);biological_process:transport(GO:0006810);biological_process:chloride tra…
ENSG00000112077	-2.58507	-2.69271	0.516638	1	RHAG	K06580	cellular_component:plasma membrane(GO:0005886);cellular_component:integral component of plasma membrane(GO:0005887);biological_process:cellular ion homeostasis(GO:0006873);molecular_function:ammonium transmembrane transporter activity(GO:0008519);biological_process:carbon dioxide transport(GO:0015670);biological_process:ammonium transport(GO:0015696);biological_process:bicarbonate transport(GO:00…
ENSG00000230845	-2.58507	-2.69271	0.516638	1	RP11-392A23.5	K00799	_
ENSG00000118402	-2.58507	-2.69271	0.516638	1	ELOVL4	K10249	molecular_function:protein binding(GO:0005515);cellular_component:endoplasmic reticulum(GO:0005783);biological_process:fatty acid biosynthetic process(GO:0006633);molecular_function:G-protein coupled photoreceptor activity(GO:0008020);biological_process:detection of visible light(GO:0009584);molecular_function:transferase activity(GO:0016740);biological_process:fatty acid elongation, saturated fa…
ENSG00000232031	-2.58507	-2.69271	0.516638	1	RP5-991C6.4	_	_
ENSG00000238628	-2.58507	-2.69271	0.516638	1	snoU13	_	_
ENSG00000260188	-2.58507	-2.69271	0.516638	1	CTA-331P3.1	_	_
ENSG00000118492	-2.58507	-2.69271	0.516638	1	ADGB	_	molecular_function:calcium-dependent cysteine-type endopeptidase activity(GO:0004198);molecular_function:iron ion binding(GO:0005506);cellular_component:intracellular(GO:0005622);biological_process:proteolysis(GO:0006508);biological_process:oxygen transport(GO:0015671);molecular_function:oxygen binding(GO:0019825);molecular_function:heme binding(GO:0020037)
ENSG00000188365	-2.58507	-2.69271	0.516638	1	AC092171.2	_	_
ENSG00000270182	-2.58507	-2.69271	0.516638	1	RP1-170O19.21	_	_
ENSG00000106483	-2.58507	-2.69271	0.516638	1	SFRP4	K02185	biological_process:vasculature development(GO:0001944);biological_process:positive regulation of receptor internalization(GO:0002092);cellular_component:extracellular region(GO:0005576);cellular_component:extracellular space(GO:0005615);cellular_component:nucleus(GO:0005634);cellular_component:cytoplasm(GO:0005737);biological_process:axonogenesis(GO:0007409);biological_process:brain development(G…
ENSG00000154997	-2.58507	-2.69271	0.516638	1	2020-09-14	K16941	molecular_function:protein binding(GO:0005515);molecular_function:GTP binding(GO:0005525);biological_process:cell cycle(GO:0007049);cellular_component:septin complex(GO:0031105);biological_process:cell division(GO:0051301)
ENSG00000241149	-2.58507	-2.69271	0.516638	1	RP11-561N12.2	K09228	_
ENSG00000228546	-2.58507	-2.69271	0.516638	1	CTA-313A17.3	K10858	_
ENSG00000272393	-2.58507	-2.69271	0.516638	1	U6	_	_
ENSG00000201354	-2.58507	-2.69271	0.516638	1	Y_RNA	_	_
ENSG00000211727	-2.58507	-2.69271	0.516638	1	TRBV7-6	_	_
ENSG00000253189	-2.58507	-2.69271	0.516638	1	RP11-158A14.1	_	_
ENSG00000186530	-2.58507	-2.69271	0.516638	1	XKR5	_	cellular_component:integral component of membrane(GO:0016021)
ENSG00000254290	-2.58507	-2.69271	0.516638	1	RP11-150O12.3	_	_
ENSG00000253173	-2.58507	-2.69271	0.516638	1	RP11-152C15.1	K11251	_
ENSG00000253639	-2.58507	-2.69271	0.516638	1	SUMO2P18	K12160	_
ENSG00000237704	-2.58507	-2.69271	0.516638	1	AP004289.2	K18403	_
ENSG00000253258	-2.58507	-2.69271	0.516638	1	RP11-539E17.5	_	_
ENSG00000254083	-2.58507	-2.69271	0.516638	1	RP11-452N4.1	_	_
ENSG00000232978	-2.58507	-2.69271	0.516638	1	RP11-146N23.4	_	_
ENSG00000237088	-2.58507	-2.69271	0.516638	1	RP11-73E6.2	K02936	_
ENSG00000171855	-2.58507	-2.69271	0.516638	1	IFNB1	K05415	biological_process:adaptive immune response(GO:0002250);molecular_function:transcription corepressor activity(GO:0003714);molecular_function:cytokine activity(GO:0005125);molecular_function:type I interferon receptor binding(GO:0005132);cellular_component:extracellular region(GO:0005576);cellular_component:extracellular space(GO:0005615);biological_process:activation of cysteine-type endopeptidas…
ENSG00000234829	-2.58507	-2.69271	0.516638	1	IFNA17	K05414	molecular_function:cytokine activity(GO:0005125);molecular_function:type I interferon receptor binding(GO:0005132);cellular_component:extracellular region(GO:0005576);cellular_component:extracellular space(GO:0005615);biological_process:blood coagulation(GO:0007596);biological_process:response to virus(GO:0009615);biological_process:cytokine-mediated signaling pathway(GO:0019221);biological_proce…
ENSG00000214929	-2.58507	-2.69271	0.516638	1	SPATA31D1	_	biological_process:spermatogenesis(GO:0007283);cellular_component:integral component of membrane(GO:0016021);biological_process:cell differentiation(GO:0030154)
ENSG00000156345	-2.58507	-2.69271	0.516638	1	CDK20	K08817	molecular_function:cyclin-dependent protein serine/threonine kinase activity(GO:0004693);molecular_function:protein binding(GO:0005515);molecular_function:ATP binding(GO:0005524);cellular_component:nucleus(GO:0005634);cellular_component:cytoplasm(GO:0005737);cellular_component:cilium(GO:0005929);biological_process:multicellular organismal development(GO:0007275);biological_process:cell division(G…
ENSG00000236115	-2.58507	-2.69271	0.516638	1	RP11-62C3.6	_	_
ENSG00000227845	-2.58507	-2.69271	0.516638	1	RP11-184B22.2	K09535	_
ENSG00000085265	-2.58507	-2.69271	0.516638	1	FCN1	K10104	biological_process:complement activation, lectin pathway(GO:0001867);molecular_function:antigen binding(GO:0003823);molecular_function:calcium ion binding(GO:0005509);cellular_component:extracellular region(GO:0005576);cellular_component:collagen trimer(GO:0005581);biological_process:complement activation(GO:0006956);biological_process:opsonization(GO:0008228);molecular_function:carbohydrate bind…
ENSG00000229926	-2.58507	-2.69271	0.516638	1	RP11-424E7.3	K05073	_
ENSG00000252648	-2.58507	-2.69271	0.516638	1	AC078993.1	_	_
ENSG00000247746	-2.58507	-2.69271	0.516638	1	USP51	K11366	;biological_process:ubiquitin-dependent protein catabolic process(GO:0006511);molecular_function:cysteine-type peptidase activity(GO:0008234);molecular_function:zinc ion binding(GO:0008270)
ENSG00000237828	-2.58507	-2.69271	0.516638	1	PA2G4P1	_	_
ENSG00000169551	-2.58507	-2.69271	0.516638	1	CT55	_	_
ENSG00000130032	-2.58507	-2.69271	0.516638	1	PRRG3	_	molecular_function:calcium ion binding(GO:0005509);cellular_component:extracellular region(GO:0005576);biological_process:biological_process(GO:0008150);cellular_component:integral component of membrane(GO:0016021)
ENSG00000231826	-2.58414	-1.59372	0.00322123	0.034832	AC016735.2	_	_
ENSG00000049540	-2.58365	-2.04081	0.0297125	0.221184	ELN	K14211	biological_process:blood vessel remodeling(GO:0001974);molecular_function:extracellular matrix structural constituent(GO:0005201);molecular_function:protein binding(GO:0005515);cellular_component:extracellular region(GO:0005576);cellular_component:proteinaceous extracellular matrix(GO:0005578);cellular_component:mitochondrion(GO:0005739);biological_process:skeletal muscle tissue development(GO:00…
ENSG00000168702	-2.5827	-1.59367	0.00340469	0.0364733	LRP1B	K04550	molecular_function:low-density lipoprotein receptor activity(GO:0005041);molecular_function:calcium ion binding(GO:0005509);biological_process:receptor-mediated endocytosis(GO:0006898);biological_process:protein transport(GO:0015031);cellular_component:integral component of membrane(GO:0016021)
ENSG00000260834	-2.58256	-1.5937	0.00375095	0.0395482	RP11-256I9.2	_	_
ENSG00000152779	-2.58213	-2.04101	0.0470177	0.319662	SLC16A12	K11810	cellular_component:plasma membrane(GO:0005886);molecular_function:symporter activity(GO:0015293);cellular_component:integral component of membrane(GO:0016021);biological_process:transmembrane transport(GO:0055085)
ENSG00000163629	-2.58184	-2.04113	0.0494284	0.329931	PTPN13	K02374	molecular_function:protein tyrosine phosphatase activity(GO:0004725);molecular_function:protein binding(GO:0005515);cellular_component:nucleus(GO:0005634);cellular_component:cytoplasm(GO:0005737);cellular_component:cytoskeleton(GO:0005856);cellular_component:plasma membrane(GO:0005886);biological_process:protein dephosphorylation(GO:0006470);cellular_component:lamellipodium(GO:0030027);biological…
ENSG00000254910	-2.58105	-1.59404	0.00316224	0.0343352	RP11-326C3.7	_	_
ENSG00000169083	-2.58042	-1.594	0.00324298	0.0350279	AR	K08557	cellular_component:nuclear chromatin(GO:0000790);molecular_function:RNA polymerase II transcription factor binding(GO:0001085);biological_process:in utero embryonic development(GO:0001701);biological_process:regulation of systemic arterial blood pressure(GO:0003073);molecular_function:DNA binding(GO:0003677);molecular_function:chromatin binding(GO:0003682);molecular_function:sequence-specific DNA…
ENSG00000215720	-2.58019	-2.69275	0.516638	1	RP1-21O18.3	_	_
ENSG00000184389	-2.58019	-2.69275	0.516638	1	A3GALT2	_	_
ENSG00000268554	-2.58019	-2.69275	0.516638	1	RP11-353N4.7	_	_
ENSG00000232237	-2.58019	-2.69275	0.516638	1	ASCL5	K09067	molecular_function:molecular_function(GO:0003674);molecular_function:DNA binding(GO:0003677);cellular_component:cellular_component(GO:0005575);cellular_component:nucleus(GO:0005634);biological_process:transcription, DNA-templated(GO:0006351);biological_process:regulation of transcription, DNA-templated(GO:0006355);biological_process:biological_process(GO:0008150);molecular_function:protein dimeri…
ENSG00000223635	-2.58019	-2.69275	0.516638	1	RP4-613A2.1	_	_
ENSG00000234962	-2.58019	-2.69275	0.516638	1	LINC00700	_	_
ENSG00000223601	-2.58019	-2.69275	0.516638	1	EBLN1	_	_
ENSG00000166220	-2.58019	-2.69275	0.516638	1	TBATA	_	cellular_component:nucleus(GO:0005634);cellular_component:cytosol(GO:0005829);biological_process:multicellular organismal development(GO:0007275);biological_process:spermatogenesis(GO:0007283);biological_process:cell differentiation(GO:0030154)
ENSG00000236762	-2.58019	-2.69275	0.516638	1	RP11-159H3.1	K02885	_
ENSG00000139572	-2.58019	-2.69275	0.516638	1	GPR84	K08421	molecular_function:G-protein coupled receptor activity(GO:0004930);cellular_component:plasma membrane(GO:0005886);biological_process:biological_process(GO:0008150);cellular_component:integral component of membrane(GO:0016021)
ENSG00000256149	-2.58019	-2.69275	0.516638	1	RP11-357K6.3	_	_
ENSG00000250091	-2.58019	-2.69275	0.516638	1	DNAH10OS	K10408	_
ENSG00000266047	-2.58019	-2.69275	0.516638	1	AL139377.1	_	_
ENSG00000252335	-2.58019	-2.69275	0.516638	1	RNU6-62P	_	_
ENSG00000243546	-2.58019	-2.69275	0.516638	1	RN7SL108P	_	_
ENSG00000267539	-2.58019	-2.69275	0.516638	1	RP11-138H8.7	_	_
ENSG00000257527	-2.58019	-2.69275	0.516638	1	MIR3179-3	_	_
ENSG00000260744	-2.58019	-2.69275	0.516638	1	RP11-329J18.3	_	_
ENSG00000212290	-2.58019	-2.69275	0.516638	1	RNA5SP424	_	_
ENSG00000261637	-2.58019	-2.69275	0.516638	1	RP11-883G14.2	_	_
ENSG00000261864	-2.58019	-2.69275	0.516638	1	RP11-67A1.2	_	_
ENSG00000266877	-2.58019	-2.69275	0.516638	1	RP1-41C23.1	_	_
ENSG00000242707	-2.58019	-2.69275	0.516638	1	RN7SL362P	_	_
ENSG00000267063	-2.58019	-2.69275	0.516638	1	AC006130.3	_	_
ENSG00000269807	-2.58019	-2.69275	0.516638	1	AC007292.4	_	_
ENSG00000131142	-2.58019	-2.69275	0.516638	1	CCL25	K13072	molecular_function:hormone activity(GO:0005179);cellular_component:extracellular region(GO:0005576);cellular_component:extracellular space(GO:0005615);biological_process:chemotaxis(GO:0006935);biological_process:inflammatory response(GO:0006954);biological_process:immune response(GO:0006955);biological_process:cell surface receptor signaling pathway(GO:0007166);biological_process:G-protein couple…
ENSG00000197110	-2.58019	-2.69275	0.516638	1	IFNL3	K05447	molecular_function:cytokine activity(GO:0005125);cellular_component:extracellular space(GO:0005615);biological_process:defense response to virus(GO:0051607)
ENSG00000269487	-2.58019	-2.69275	0.516638	1	CTB-174O21.2	_	_
ENSG00000235403	-2.58019	-2.69275	0.516638	1	AC114808.3	_	_
ENSG00000206898	-2.58019	-2.69275	0.516638	1	SNORA51	_	_
ENSG00000229920	-2.58019	-2.69275	0.516638	1	RPS4XP5	K02987	_
ENSG00000222033	-2.58019	-2.69275	0.516638	1	LINC01124	_	_
ENSG00000226410	-2.58019	-2.69275	0.516638	1	AC104058.1	_	_
ENSG00000267963	-2.58019	-2.69275	0.516638	1	AC013469.1	_	_
ENSG00000125816	-2.58019	-2.69275	0.516638	1	NKX2-4	K09344	molecular_function:molecular_function(GO:0003674);molecular_function:sequence-specific DNA binding transcription factor activity(GO:0003700);cellular_component:cellular_component(GO:0005575);cellular_component:nucleus(GO:0005634);biological_process:multicellular organismal development(GO:0007275);biological_process:biological_process(GO:0008150);molecular_function:sequence-specific DNA binding(GO…
ENSG00000228050	-2.58019	-2.69275	0.516638	1	TOP3BP1	K03165	_
ENSG00000226912	-2.58019	-2.69275	0.516638	1	ISCA2P1	_	_
ENSG00000225528	-2.58019	-2.69275	0.516638	1	RP3-370M22.8	_	_
ENSG00000238350	-2.58019	-2.69275	0.516638	1	snoU13	_	_
ENSG00000214288	-2.58019	-2.69275	0.516638	1	HMGB3P13	K11296	_
ENSG00000206113	-2.58019	-2.69275	0.516638	1	RP11-503N18.1	_	_
ENSG00000187904	-2.58019	-2.69275	0.516638	1	AC097382.5	_	_
ENSG00000248590	-2.58019	-2.69275	0.516638	1	GLDCP1	K00281	_
ENSG00000248629	-2.58019	-2.69275	0.516638	1	RP11-154F14.2	_	_
ENSG00000249279	-2.58019	-2.69275	0.516638	1	CTC-436P18.3	_	_
ENSG00000238000	-2.58019	-2.69275	0.516638	1	RP11-274E7.2	K06697	_
ENSG00000250244	-2.58019	-2.69275	0.516638	1	CTB-49A3.4	_	_
ENSG00000260455	-2.58019	-2.69275	0.516638	1	CASC14	_	_
ENSG00000204610	-2.58019	-2.69275	0.516638	1	TRIM15	K12005	cellular_component:intracellular(GO:0005622);biological_process:mesodermal cell fate determination(GO:0007500);molecular_function:zinc ion binding(GO:0008270)
ENSG00000248993	-2.58019	-2.69275	0.516638	1	XXbac-BPG181M17.5	K06752	_
ENSG00000169075	-2.58019	-2.69275	0.516638	1	BRD7P3	K11723	_
ENSG00000224733	-2.58019	-2.69275	0.516638	1	RP1-86D1.5	_	_
ENSG00000201990	-2.58019	-2.69275	0.516638	1	Y_RNA	_	_
ENSG00000207217	-2.58019	-2.69275	0.516638	1	SNORA42	_	_
ENSG00000233108	-2.58019	-2.69275	0.516638	1	AC006042.7	_	_
ENSG00000171243	-2.58019	-2.69275	0.516638	1	SOSTDC1	_	cellular_component:extracellular space(GO:0005615);biological_process:pattern specification process(GO:0007389);biological_process:negative regulation of cell fate commitment(GO:0010454);biological_process:Wnt signaling pathway(GO:0016055);biological_process:negative regulation of BMP signaling pathway(GO:0030514);biological_process:hair follicle morphogenesis(GO:0031069);biological_process:odont…
ENSG00000236494	-2.58019	-2.69275	0.516638	1	RP11-89N17.4	_	_
ENSG00000242562	-2.58019	-2.69275	0.516638	1	DCAF13P1	K11806	_
ENSG00000219491	-2.58019	-2.69275	0.516638	1	TPT1P8	_	_
ENSG00000254331	-2.58019	-2.69275	0.516638	1	CKS1BP7	K02219	_
ENSG00000244642	-2.58019	-2.69275	0.516638	1	RN7SL396P	_	_
ENSG00000253543	-2.58019	-2.69275	0.516638	1	RP11-89K10.2	K09228	_
ENSG00000254338	-2.58019	-2.69275	0.516638	1	RP11-909N17.3	_	_
ENSG00000185247	-2.58019	-2.69275	0.516638	1	MAGEA11	_	molecular_function:protein binding(GO:0005515);cellular_component:nucleus(GO:0005634);cellular_component:cytoplasm(GO:0005737)
ENSG00000184292	-2.58003	-2.04109	0.0494503	0.330001	TACSTD2	K17288	molecular_function:receptor activity(GO:0004872);cellular_component:extracellular space(GO:0005615);cellular_component:nucleus(GO:0005634);cellular_component:cytosol(GO:0005829);cellular_component:integral component of plasma membrane(GO:0005887);biological_process:cell surface receptor signaling pathway(GO:0007166);biological_process:visual perception(GO:0007601);biological_process:cell prolifer…
ENSG00000259698	-2.58002	-2.04117	0.0465553	0.317077	KIAA0125P2	_	_
ENSG00000182261	-2.57977	-0.0771844	2.67e-09	9.72e-08	NLRP10	_	biological_process:positive regulation of T-helper 1 type immune response(GO:0002827);molecular_function:ATP binding(GO:0005524);cellular_component:cytoplasm(GO:0005737);cellular_component:extrinsic component of plasma membrane(GO:0019897);biological_process:helper T cell enhancement of adaptive immune response(GO:0035397);biological_process:dendritic cell migration(GO:0036336);biological_process…
ENSG00000230807	-2.5788	-2.04122	0.0464172	0.31621	AC099535.4	K02927	_
ENSG00000039068	-2.57745	-2.04125	0.050082	0.333034	CDH1	K05689	biological_process:trophectodermal cell differentiation(GO:0001829);molecular_function:calcium ion binding(GO:0005509);molecular_function:protein binding(GO:0005515);cellular_component:cytoplasm(GO:0005737);cellular_component:endosome(GO:0005768);cellular_component:Golgi apparatus(GO:0005794);cellular_component:trans-Golgi network(GO:0005802);cellular_component:plasma membrane(GO:0005886);cellula…
ENSG00000155897	-2.57712	-2.04127	0.0488438	0.326933	ADCY8	K08048	molecular_function:nucleotide binding(GO:0000166);molecular_function:adenylate cyclase activity(GO:0004016);molecular_function:ATP binding(GO:0005524);cellular_component:plasma membrane(GO:0005886);biological_process:energy reserve metabolic process(GO:0006112);biological_process:water transport(GO:0006833);biological_process:signal transduction(GO:0007165);biological_process:epidermal growth fac…
ENSG00000197241	-2.57532	-2.6928	0.516638	1	SLC2A7	K12201	cellular_component:plasma membrane(GO:0005886);biological_process:carbohydrate transport(GO:0008643);cellular_component:integral component of membrane(GO:0016021);molecular_function:substrate-specific transmembrane transporter activity(GO:0022891);biological_process:transmembrane transport(GO:0055085)
ENSG00000162490	-2.57532	-2.6928	0.516638	1	DRAXIN	K17985	cellular_component:extracellular region(GO:0005576);biological_process:axon guidance(GO:0007411);biological_process:Wnt signaling pathway(GO:0016055);biological_process:dorsal spinal cord development(GO:0021516);biological_process:commissural neuron differentiation in spinal cord(GO:0021528);biological_process:forebrain development(GO:0030900);biological_process:negative regulation of canonical W…
ENSG00000237429	-2.57532	-2.6928	0.516638	1	RP1-159A19.4	_	_
ENSG00000186377	-2.57532	-2.6928	0.516638	1	CYP4X1	K07428	molecular_function:iron ion binding(GO:0005506);cellular_component:endoplasmic reticulum membrane(GO:0005789);molecular_function:electron carrier activity(GO:0009055);cellular_component:integral component of membrane(GO:0016021);molecular_function:heme binding(GO:0020037);molecular_function:aromatase activity(GO:0070330)
ENSG00000215875	-2.57532	-2.6928	0.516638	1	ST13P20	K09560	_
ENSG00000230446	-2.57532	-2.6928	0.516638	1	RP11-423O2.3	K03880	_
ENSG00000227773	-2.57532	-2.6928	0.516638	1	ASH1L-IT1	_	_
ENSG00000260021	-2.57532	-2.6928	0.516638	1	RP11-480I12.10	_	_
ENSG00000230550	-2.57532	-2.6928	0.516638	1	RP11-74C13.3	_	_
ENSG00000224717	-2.57532	-2.6928	0.516638	1	RP11-576D8.4	_	_
ENSG00000272055	-2.57532	-2.6928	0.516638	1	RNU6-6P	_	_
ENSG00000233642	-2.57532	-2.6928	0.516638	1	GPR158-AS1	_	_
ENSG00000229659	-2.57532	-2.6928	0.516638	1	RP11-345K20.2	K02898	_
ENSG00000224500	-2.57532	-2.6928	0.516638	1	RP11-328K22.1	_	_
ENSG00000223735	-2.57532	-2.6928	0.516638	1	OR51B3P	K04257	_
ENSG00000255476	-2.57532	-2.6928	0.516638	1	RP11-1H15.2	_	_
ENSG00000221322	-2.57532	-2.6928	0.516638	1	AC116533.1	_	_
ENSG00000255267	-2.57532	-2.6928	0.516638	1	RP11-430H10.2	_	_
ENSG00000254915	-2.57532	-2.6928	0.516638	1	RP11-263C24.3	_	_
ENSG00000225236	-2.57532	-2.6928	0.516638	1	AP000936.5	K14397	_
ENSG00000244712	-2.57532	-2.6928	0.516638	1	RP11-874G11.1	K02905	_
ENSG00000256199	-2.57532	-2.6928	0.516638	1	RP11-439H13.2	_	_
ENSG00000235872	-2.57532	-2.6928	0.516638	1	RP11-335O4.3	_	_
ENSG00000258115	-2.57532	-2.6928	0.516638	1	RP11-89M22.3	_	_
ENSG00000258100	-2.57532	-2.6928	0.516638	1	RP11-121E16.1	_	_
ENSG00000272214	-2.57532	-2.6928	0.516638	1	AC079602.1	K17985	_
ENSG00000238665	-2.57532	-2.6928	0.516638	1	snoU13	_	_
ENSG00000238629	-2.57532	-2.6928	0.516638	1	snoU13	_	_
ENSG00000232662	-2.57532	-2.6928	0.516638	1	LDHBP1	K00016	_
ENSG00000258696	-2.57532	-2.6928	0.516638	1	CTD-2058B24.3	_	_
ENSG00000221645	-2.57532	-2.6928	0.516638	1	AL157791.1	_	_
ENSG00000054983	-2.57532	-2.6928	0.516638	1	GALC	K01202	molecular_function:galactosylceramidase activity(GO:0004336);cellular_component:mitochondrion(GO:0005739);cellular_component:lysosome(GO:0005764);biological_process:carbohydrate metabolic process(GO:0005975);biological_process:sphingolipid metabolic process(GO:0006665);biological_process:galactosylceramide catabolic process(GO:0006683);biological_process:glycosphingolipid metabolic process(GO:000…
ENSG00000259338	-2.57532	-2.6928	0.516638	1	CTD-2651B20.2	K11253	_
ENSG00000265942	-2.57532	-2.6928	0.516638	1	RN7SL577P	_	_
ENSG00000252217	-2.57532	-2.6928	0.516638	1	Y_RNA	_	_
ENSG00000259947	-2.57532	-2.6928	0.516638	1	XX-DJ76P10__A.2	_	_
ENSG00000261962	-2.57532	-2.6928	0.516638	1	AC009133.20	_	_
ENSG00000260628	-2.57532	-2.6928	0.516638	1	RP11-1166P10.1	_	_
ENSG00000202251	-2.57532	-2.6928	0.516638	1	Y_RNA	_	_
ENSG00000262492	-2.57532	-2.6928	0.516638	1	RP11-1099M24.8	K02889	_
ENSG00000177369	-2.57532	-2.6928	0.516638	1	RP1-62O9.3	_	_
ENSG00000266707	-2.57532	-2.6928	0.516638	1	PSMD7P1	K03038	_
ENSG00000267466	-2.57532	-2.6928	0.516638	1	RP11-13K12.5	_	_
ENSG00000204282	-2.57532	-2.6928	0.516638	1	TNRC6C-AS1	_	_
ENSG00000173213	-2.57532	-2.6928	0.516638	1	RP11-683L23.1	_	_
ENSG00000265097	-2.57532	-2.6928	0.516638	1	RBM22P1	_	_
ENSG00000268873	-2.57532	-2.6928	0.516638	1	RP11-138H11.1	_	_
ENSG00000244080	-2.57532	-2.6928	0.516638	1	RN7SL833P	_	_
ENSG00000269742	-2.57532	-2.6928	0.516638	1	CTB-135N1.2	_	_
ENSG00000105697	-2.57532	-2.6928	0.516638	1	HAMP	K17985	molecular_function:hormone activity(GO:0005179);cellular_component:extracellular region(GO:0005576);biological_process:cellular iron ion homeostasis(GO:0006879);biological_process:immune response(GO:0006955);biological_process:killing of cells of other organism(GO:0031640);biological_process:defense response to bacterium(GO:0042742);cellular_component:apical cortex(GO:0045179);biological_process:…
ENSG00000268581	-2.57532	-2.6928	0.516638	1	SIGLEC18P	K06748	_
ENSG00000268545	-2.57532	-2.6928	0.516638	1	VN1R107P	K04614	_
ENSG00000201076	-2.57532	-2.6928	0.516638	1	RNU4-51P	_	_
ENSG00000214525	-2.57532	-2.6928	0.516638	1	AC130709.1	_	_
ENSG00000264051	-2.57532	-2.6928	0.516638	1	AC007881.1	_	_
ENSG00000229209	-2.57532	-2.6928	0.516638	1	AC073987.1	_	_
ENSG00000260142	-2.57532	-2.6928	0.516638	1	RP11-764E7.1	_	_
ENSG00000237166	-2.57532	-2.6928	0.516638	1	AC007163.3	_	_
ENSG00000226321	-2.57532	-2.6928	0.516638	1	AC104809.3	_	_
ENSG00000205181	-2.57532	-2.6928	0.516638	1	LINC00654	_	_
ENSG00000270777	-2.57532	-2.6928	0.516638	1	RP11-103J8.2	_	_
ENSG00000228935	-2.57532	-2.6928	0.516638	1	RP11-189G24.2	_	_
ENSG00000231081	-2.57532	-2.6928	0.516638	1	RP4-760C5.3	_	_
ENSG00000231604	-2.57532	-2.6928	0.516638	1	RP5-897D18.1	_	_
ENSG00000251772	-2.57532	-2.6928	0.516638	1	AL117380.2	_	_
ENSG00000225708	-2.57532	-2.6928	0.516638	1	RP13-379L11.1	_	_
ENSG00000226930	-2.57532	-2.6928	0.516638	1	GTF2IP2	K03121	_
ENSG00000232512	-2.57532	-2.6928	0.516638	1	7SK	_	_
ENSG00000273082	-2.57532	-2.6928	0.516638	1	LL22NC03-32F9.1	_	_
ENSG00000243902	-2.57532	-2.6928	0.516638	1	RP1-63G5.5	_	_
ENSG00000226738	-2.57532	-2.6928	0.516638	1	CTA-384D8.31	_	_
ENSG00000271943	-2.57532	-2.6928	0.516638	1	RP11-222K16.1	_	_
ENSG00000228214	-2.57532	-2.6928	0.516638	1	LINC00693	_	_
ENSG00000207922	-2.57532	-2.6928	0.516638	1	MIR566	_	_
ENSG00000234036	-2.57532	-2.6928	0.516638	1	TXNP6	K03671	_
ENSG00000207927	-2.57532	-2.6928	0.516638	1	MIR302A	_	_
ENSG00000272727	-2.57532	-2.6928	0.516638	1	RP11-142A22.4	_	_
ENSG00000250378	-2.57532	-2.6928	0.516638	1	RP11-119J18.1	_	_
ENSG00000223946	-2.57532	-2.6928	0.516638	1	RP11-533O20.2	_	_
ENSG00000179157	-2.57532	-2.6928	0.516638	1	RPS2P28	K02981	_
ENSG00000219863	-2.57532	-2.6928	0.516638	1	RPL31P28	K02910	_
ENSG00000266073	-2.57532	-2.6928	0.516638	1	AL590874.1	_	_
ENSG00000261003	-2.57532	-2.6928	0.516638	1	RP1-140C12.2	_	_
ENSG00000234999	-2.57532	-2.6928	0.516638	1	AC004016.2	K11095	_
ENSG00000233854	-2.57532	-2.6928	0.516638	1	POU6F2-AS2	_	_
ENSG00000271414	-2.57532	-2.6928	0.516638	1	RP11-751K21.1	_	_
ENSG00000241456	-2.57532	-2.6928	0.516638	1	RP4-555L14.4	_	_
ENSG00000206938	-2.57532	-2.6928	0.516638	1	RNU4-31P	_	_
ENSG00000272293	-2.57532	-2.6928	0.516638	1	RP11-91J19.3	_	_
ENSG00000254235	-2.57532	-2.6928	0.516638	1	RP11-115J16.1	_	_
ENSG00000253535	-2.57532	-2.6928	0.516638	1	RP11-624C23.1	_	_
ENSG00000253500	-2.57532	-2.6928	0.516638	1	AF121898.3	_	_
ENSG00000253868	-2.57532	-2.6928	0.516638	1	FER1L6-AS2	_	_
ENSG00000199652	-2.57532	-2.6928	0.516638	1	RNU1-35P	_	_
ENSG00000203438	-2.57532	-2.6928	0.516638	1	AL512625.1	_	_
ENSG00000225833	-2.57532	-2.6928	0.516638	1	GS1-594A7.3	_	_
ENSG00000251807	-2.57532	-2.6928	0.516638	1	RNU6-202P	_	_
ENSG00000224208	-2.57532	-2.6928	0.516638	1	AL590762.6	K13154	_
ENSG00000225235	-2.57532	-2.6928	0.516638	1	DDX26B-AS1	_	_
ENSG00000226170	-2.57532	-2.6928	0.516638	1	U82671.12	_	_
ENSG00000254463	-2.57501	-1.59415	0.00563235	0.0559706	RP11-484D2.3	K03767	_
ENSG00000257711	-2.5742	-2.04135	0.0497304	0.331297	RP11-482D24.2	_	_
ENSG00000233750	-2.57197	-2.69284	0.516638	1	CICP27	K12581	_
ENSG00000162494	-2.57197	-2.69284	0.516638	1	LRRC38	_	cellular_component:plasma membrane(GO:0005886);biological_process:ion transport(GO:0006811);cellular_component:integral component of membrane(GO:0016021)
ENSG00000188257	-2.57197	-2.69284	0.516638	1	PLA2G2A	K01047	molecular_function:phospholipase A2 activity(GO:0004623);molecular_function:calcium ion binding(GO:0005509);molecular_function:phospholipid binding(GO:0005543);cellular_component:extracellular region(GO:0005576);cellular_component:extracellular space(GO:0005615);cellular_component:endoplasmic reticulum(GO:0005783);cellular_component:endoplasmic reticulum membrane(GO:0005789);biological_process:ph…
ENSG00000176083	-2.57197	-2.69284	0.516638	1	ZNF683	K10087	biological_process:natural killer cell differentiation(GO:0001779);molecular_function:DNA binding(GO:0003677);cellular_component:nucleus(GO:0005634);biological_process:transcription, DNA-templated(GO:0006351);biological_process:regulation of transcription, DNA-templated(GO:0006355);molecular_function:metal ion binding(GO:0046872)
ENSG00000084628	-2.57197	-2.69284	0.516638	1	NKAIN1	_	cellular_component:plasma membrane(GO:0005886);cellular_component:integral component of membrane(GO:0016021)
ENSG00000142973	-2.57197	-2.69284	0.516638	1	CYP4B1	K07426	molecular_function:monooxygenase activity(GO:0004497);molecular_function:iron ion binding(GO:0005506);cellular_component:endoplasmic reticulum membrane(GO:0005789);biological_process:xenobiotic metabolic process(GO:0006805);molecular_function:drug binding(GO:0008144);molecular_function:electron carrier activity(GO:0009055);molecular_function:oxidoreductase activity, acting on paired donors, with …
ENSG00000154198	-2.57197	-2.69284	0.516638	1	CYP4Z2P	K07429	molecular_function:iron ion binding(GO:0005506);molecular_function:electron carrier activity(GO:0009055);cellular_component:integral component of membrane(GO:0016021);molecular_function:oxidoreductase activity, acting on paired donors, with incorporation or reduction of molecular oxygen(GO:0016705);molecular_function:heme binding(GO:0020037)
ENSG00000187048	-2.57197	-2.69284	0.516638	1	CYP4A11	K17687	biological_process:long-chain fatty acid metabolic process(GO:0001676);biological_process:renal water homeostasis(GO:0003091);biological_process:pressure natriuresis(GO:0003095);molecular_function:monooxygenase activity(GO:0004497);molecular_function:iron ion binding(GO:0005506);cellular_component:cytoplasm(GO:0005737);cellular_component:endoplasmic reticulum membrane(GO:0005789);biological_proce…
ENSG00000224986	-2.57197	-2.69284	0.516638	1	PPP1R8P1	K13216	_
ENSG00000173406	-2.57197	-2.69284	0.516638	1	DAB1	_	biological_process:neuron migration(GO:0001764);cellular_component:cytosol(GO:0005829);cellular_component:brush border(GO:0005903);biological_process:negative regulation of cell adhesion(GO:0007162);biological_process:small GTPase mediated signal transduction(GO:0007264);biological_process:midgut development(GO:0007494);biological_process:adult walking behavior(GO:0007628);cellular_component:post…
ENSG00000116783	-2.57197	-2.69284	0.516638	1	TNNI3K	K17535	molecular_function:protein kinase activity(GO:0004672);molecular_function:protein serine/threonine kinase activity(GO:0004674);molecular_function:protein binding(GO:0005515);molecular_function:ATP binding(GO:0005524);cellular_component:nucleus(GO:0005634);cellular_component:cytoplasm(GO:0005737);biological_process:protein phosphorylation(GO:0006468);molecular_function:protein C-terminus binding(G…
ENSG00000122420	-2.57197	-2.69284	0.516638	1	PTGFR	K04262	molecular_function:prostaglandin F receptor activity(GO:0004958);cellular_component:extracellular region(GO:0005576);cellular_component:cytoplasm(GO:0005737);cellular_component:plasma membrane(GO:0005886);cellular_component:integral component of plasma membrane(GO:0005887);biological_process:G-protein coupled receptor signaling pathway(GO:0007186);biological_process:parturition(GO:0007567);cellul…
ENSG00000137948	-2.57197	-2.69284	0.516638	1	BRDT	K11724	biological_process:histone displacement(GO:0001207);molecular_function:transcription coactivator activity(GO:0003713);cellular_component:nucleus(GO:0005634);biological_process:chromatin remodeling(GO:0006338);biological_process:transcription, DNA-templated(GO:0006351);biological_process:mRNA processing(GO:0006397);biological_process:male meiosis(GO:0007140);biological_process:male meiosis I(GO:00…
ENSG00000118733	-2.57197	-2.69284	0.516638	1	OLFM3	_	cellular_component:extracellular space(GO:0005615);cellular_component:Golgi apparatus(GO:0005794);cellular_component:cell junction(GO:0030054);cellular_component:alpha-amino-3-hydroxy-5-methyl-4-isoxazolepropionic acid selective glutamate receptor complex(GO:0032281);biological_process:eye photoreceptor cell development(GO:0042462);cellular_component:synapse(GO:0045202)
ENSG00000162631	-2.57197	-2.69284	0.516638	1	NTNG1	K07522	molecular_function:protein binding(GO:0005515);biological_process:axonogenesis(GO:0007409);cellular_component:anchored component of plasma membrane(GO:0046658)
ENSG00000198758	-2.57197	-2.69284	0.516638	1	EPS8L3	K17277	cellular_component:cytoplasm(GO:0005737)
ENSG00000143125	-2.57197	-2.69284	0.516638	1	PROK1	_	biological_process:activation of MAPK activity(GO:0000187);biological_process:angiogenesis(GO:0001525);cellular_component:extracellular region(GO:0005576);molecular_function:growth factor activity(GO:0008083);biological_process:positive regulation of cell proliferation(GO:0008284);biological_process:regulation of angiogenesis(GO:0045765);biological_process:positive regulation of cell division(GO:…
ENSG00000134207	-2.57197	-2.69284	0.516638	1	SYT6	_	molecular_function:transporter activity(GO:0005215);molecular_function:calcium-dependent phospholipid binding(GO:0005544);cellular_component:cytosol(GO:0005829);cellular_component:plasma membrane(GO:0005886);biological_process:acrosome reaction(GO:0007340);cellular_component:integral component of membrane(GO:0016021);cellular_component:extrinsic component of membrane(GO:0019898);molecular_functio…
ENSG00000134200	-2.57197	-2.69284	0.516638	1	TSHB	K05251	molecular_function:hormone activity(GO:0005179);cellular_component:extracellular region(GO:0005576);biological_process:G-protein coupled receptor signaling pathway(GO:0007186);biological_process:cell-cell signaling(GO:0007267);biological_process:anatomical structure morphogenesis(GO:0009653);biological_process:peptide hormone processing(GO:0016486);biological_process:response to vitamin A(GO:0033…
ENSG00000229683	-2.57197	-2.69284	0.516638	1	ASNSP5	K01953	_
ENSG00000121634	-2.57197	-2.69284	0.516638	1	GJA8	K07617	biological_process:lens development in camera-type eye(GO:0002088);cellular_component:integral component of plasma membrane(GO:0005887);cellular_component:connexon complex(GO:0005922);biological_process:transport(GO:0006810);biological_process:cell-cell signaling(GO:0007267);biological_process:visual perception(GO:0007601);molecular_function:channel activity(GO:0015267);biological_process:protein…
ENSG00000159409	-2.57197	-2.69284	0.516638	1	CELF3	K13207	molecular_function:nucleotide binding(GO:0000166);biological_process:regulation of alternative mRNA splicing, via spliceosome(GO:0000381);biological_process:mRNA splicing, via spliceosome(GO:0000398);molecular_function:nucleic acid binding(GO:0003676);molecular_function:RNA binding(GO:0003723);molecular_function:mRNA binding(GO:0003729);cellular_component:nucleus(GO:0005634);cellular_component:cy…
ENSG00000027644	-2.57197	-2.69284	0.516638	1	INSRR	K05086	molecular_function:transmembrane receptor protein tyrosine kinase activity(GO:0004714);molecular_function:ATP binding(GO:0005524);cellular_component:integral component of plasma membrane(GO:0005887);biological_process:transmembrane receptor protein tyrosine kinase signaling pathway(GO:0007169);biological_process:male sex determination(GO:0030238);biological_process:actin cytoskeleton reorganizati…
ENSG00000158477	-2.57197	-2.69284	0.516638	1	CD1A	K06448	molecular_function:protein binding(GO:0005515);cellular_component:integral component of plasma membrane(GO:0005887);biological_process:immune response(GO:0006955);cellular_component:endosome membrane(GO:0010008);biological_process:antigen processing and presentation(GO:0019882)
ENSG00000132693	-2.57197	-2.69284	0.516638	1	CRP	K16143	biological_process:response to hypoxia(GO:0001666);molecular_function:protein binding(GO:0005515);cellular_component:extracellular region(GO:0005576);cellular_component:extracellular space(GO:0005615);cellular_component:mitochondrion(GO:0005739);cellular_component:plasma membrane(GO:0005886);biological_process:acute-phase response(GO:0006953);biological_process:inflammatory response(GO:0006954);b…
ENSG00000181036	-2.57197	-2.69284	0.516638	1	FCRL6	K17273	cellular_component:external side of plasma membrane(GO:0009897);cellular_component:integral component of membrane(GO:0016021);molecular_function:protein phosphatase binding(GO:0019903)
ENSG00000117091	-2.57197	-2.69284	0.516638	1	CD48	K06479	molecular_function:antigen binding(GO:0003823);molecular_function:receptor activity(GO:0004872);molecular_function:protein binding(GO:0005515);cellular_component:plasma membrane(GO:0005886);cellular_component:integral component of plasma membrane(GO:0005887);biological_process:defense response(GO:0006952);biological_process:signal transduction(GO:0007165);biological_process:blood coagulation(GO:0…
ENSG00000248485	-2.57197	-2.69284	0.516638	1	PCP4L1	_	_
ENSG00000117507	-2.57197	-2.69284	0.516638	1	FMO6P	K00485	molecular_function:N,N-dimethylaniline monooxygenase activity(GO:0004499);cellular_component:endoplasmic reticulum membrane(GO:0005789);cellular_component:integral component of membrane(GO:0016021);molecular_function:flavin adenine dinucleotide binding(GO:0050660);molecular_function:NADP binding(GO:0050661)
ENSG00000213058	-2.57197	-2.69284	0.516638	1	RP4-765C7.2	K02955	_
ENSG00000162782	-2.57197	-2.69284	0.516638	1	TDRD5	K18407	biological_process:spermatid development(GO:0007286);biological_process:P granule organization(GO:0030719);cellular_component:chromatoid body(GO:0033391);biological_process:DNA methylation involved in gamete generation(GO:0043046);cellular_component:pi-body(GO:0071546)
ENSG00000162687	-2.57197	-2.69284	0.516638	1	KCNT2	K04947	molecular_function:voltage-gated potassium channel activity(GO:0005249);molecular_function:ATP binding(GO:0005524);cellular_component:voltage-gated potassium channel complex(GO:0008076);molecular_function:calcium-activated potassium channel activity(GO:0015269);cellular_component:membrane(GO:0016020);biological_process:potassium ion transmembrane transport(GO:0071805)
ENSG00000134365	-2.57197	-2.69284	0.516638	1	CFHR4	K04004	molecular_function:lipid transporter activity(GO:0005319);cellular_component:extracellular region(GO:0005576);biological_process:lipid transport(GO:0006869)
ENSG00000133067	-2.57197	-2.69284	0.516638	1	LGR6	K08399	molecular_function:transmembrane signaling receptor activity(GO:0004888);molecular_function:G-protein coupled receptor activity(GO:0004930);molecular_function:protein binding(GO:0005515);cellular_component:integral component of plasma membrane(GO:0005887);biological_process:Wnt signaling pathway(GO:0016055);cellular_component:trans-Golgi network membrane(GO:0032588);biological_process:positive re…
ENSG00000234761	-2.57197	-2.69284	0.516638	1	RP11-38O14.5	_	_
ENSG00000123689	-2.57197	-2.69284	0.516638	1	G0S2	_	molecular_function:molecular_function(GO:0003674);molecular_function:protein binding(GO:0005515);cellular_component:mitochondrion(GO:0005739);cellular_component:lipid particle(GO:0005811);biological_process:cellular lipid metabolic process(GO:0044255);biological_process:small molecule metabolic process(GO:0044281);biological_process:extrinsic apoptotic signaling pathway(GO:0097191);biological_pro…
ENSG00000162817	-2.57197	-2.69284	0.516638	1	C1orf115	_	cellular_component:integral component of membrane(GO:0016021)
ENSG00000215796	-2.57197	-2.69284	0.516638	1	RP11-551G24.2	K02684	_
ENSG00000169214	-2.57197	-2.69284	0.516638	1	OR6F1	K04257	molecular_function:G-protein coupled receptor activity(GO:0004930);molecular_function:olfactory receptor activity(GO:0004984);cellular_component:plasma membrane(GO:0005886);cellular_component:integral component of membrane(GO:0016021)
ENSG00000171180	-2.57197	-2.69284	0.516638	1	OR2M4	K04257	molecular_function:G-protein coupled receptor activity(GO:0004930);molecular_function:olfactory receptor activity(GO:0004984);cellular_component:plasma membrane(GO:0005886);biological_process:sensory perception of smell(GO:0007608);cellular_component:integral component of membrane(GO:0016021);biological_process:detection of chemical stimulus involved in sensory perception of smell(GO:0050911)
ENSG00000183049	-2.57197	-2.69284	0.516638	1	CAMK1D	K08794	molecular_function:calmodulin-dependent protein kinase activity(GO:0004683);molecular_function:calmodulin binding(GO:0005516);molecular_function:ATP binding(GO:0005524);cellular_component:nucleus(GO:0005634);cellular_component:cytoplasm(GO:0005737);cellular_component:calcium- and calmodulin-dependent protein kinase complex(GO:0005954);biological_process:inflammatory response(GO:0006954);biologica…
ENSG00000237470	-2.57197	-2.69284	0.516638	1	DCLRE1CP1	K10887	_
ENSG00000168267	-2.57197	-2.69284	0.516638	1	PTF1A	K09073	molecular_function:RNA polymerase II core promoter proximal region sequence-specific DNA binding transcription factor activity involved in positive regulation of transcription(GO:0001077);molecular_function:DNA binding(GO:0003677);cellular_component:nucleus(GO:0005634);cellular_component:transcription factor complex(GO:0005667);cellular_component:cytoplasm(GO:0005737);biological_process:regulatio…
ENSG00000150051	-2.57197	-2.69284	0.516638	1	MKX	_	biological_process:negative regulation of transcription from RNA polymerase II promoter(GO:0000122);molecular_function:sequence-specific DNA binding RNA polymerase II transcription factor activity(GO:0000981);molecular_function:RNA polymerase II transcription factor binding(GO:0001085);biological_process:tendon sheath development(GO:0002932);molecular_function:sequence-specific DNA binding transc…
ENSG00000128802	-2.57197	-2.69284	0.516638	1	GDF2	K05503	biological_process:ossification(GO:0001503);biological_process:patterning of blood vessels(GO:0001569);biological_process:vasculogenesis(GO:0001570);biological_process:osteoblast differentiation(GO:0001649);biological_process:negative regulation of endothelial cell proliferation(GO:0001937);biological_process:positive regulation of endothelial cell proliferation(GO:0001938);molecular_function:cyt…
ENSG00000172538	-2.57197	-2.69284	0.516638	1	FAM170B	_	_
ENSG00000178645	-2.57197	-2.69284	0.516638	1	C10orf53	_	_
ENSG00000138294	-2.57197	-2.69284	0.516638	1	MSMB	_	molecular_function:molecular_function(GO:0003674);cellular_component:extracellular space(GO:0005615);cellular_component:nucleus(GO:0005634);biological_process:biological_process(GO:0008150)
ENSG00000198739	-2.57197	-2.69284	0.516638	1	LRRTM3	_	cellular_component:plasma membrane(GO:0005886);cellular_component:integral component of membrane(GO:0016021);cellular_component:cell junction(GO:0030054);cellular_component:postsynaptic membrane(GO:0045211);biological_process:positive regulation of beta-amyloid formation(GO:1902004)
ENSG00000188716	-2.57197	-2.69284	0.516638	1	DUPD1	K14165	molecular_function:protein tyrosine phosphatase activity(GO:0004725);cellular_component:cytoplasm(GO:0005737);biological_process:protein dephosphorylation(GO:0006470);molecular_function:protein tyrosine/serine/threonine phosphatase activity(GO:0008138)
ENSG00000185303	-2.57197	-2.69284	0.516638	1	SFTPA2	K10067	cellular_component:extracellular region(GO:0005576);cellular_component:collagen trimer(GO:0005581);cellular_component:extracellular space(GO:0005615);biological_process:respiratory gaseous exchange(GO:0007585);molecular_function:carbohydrate binding(GO:0030246)
ENSG00000225836	-2.57197	-2.69284	0.516638	1	RP11-80H5.6	_	_
ENSG00000095596	-2.57197	-2.69284	0.516638	1	CYP26A1	K07437	molecular_function:retinoic acid binding(GO:0001972);molecular_function:iron ion binding(GO:0005506);cellular_component:endoplasmic reticulum membrane(GO:0005789);biological_process:vitamin metabolic process(GO:0006766);biological_process:xenobiotic metabolic process(GO:0006805);biological_process:central nervous system development(GO:0007417);biological_process:metabolic process(GO:0008152);mole…
ENSG00000186188	-2.57197	-2.69284	0.516638	1	FFAR4	K08425	molecular_function:fatty acid binding(GO:0005504);cellular_component:plasma membrane(GO:0005886);molecular_function:taste receptor activity(GO:0008527);biological_process:regulation of glucose transport(GO:0010827);cellular_component:integral component of membrane(GO:0016021);cellular_component:endocytic vesicle(GO:0030139);biological_process:hormone secretion(GO:0046879);biological_process:negat…
ENSG00000269948	-2.57197	-2.69284	0.516638	1	RP11-248J23.6	K19352	_
ENSG00000197430	-2.57197	-2.69284	0.516638	1	OPALIN	_	cellular_component:Golgi apparatus(GO:0005794);cellular_component:plasma membrane(GO:0005886);cellular_component:integral component of membrane(GO:0016021)
ENSG00000236662	-2.57197	-2.69284	0.516638	1	RP11-108L7.4	_	_
ENSG00000119913	-2.57197	-2.69284	0.516638	1	TECTB	_	molecular_function:extracellular matrix structural constituent(GO:0005201);cellular_component:proteinaceous extracellular matrix(GO:0005578);cellular_component:plasma membrane(GO:0005886);cellular_component:anchored component of membrane(GO:0031225)
ENSG00000095627	-2.57197	-2.69284	0.516638	1	TDRD1	K18405	cellular_component:cytoplasm(GO:0005737);biological_process:meiotic nuclear division(GO:0007126);biological_process:multicellular organismal development(GO:0007275);biological_process:germ cell development(GO:0007281);biological_process:spermatogenesis(GO:0007283);biological_process:gene silencing by RNA(GO:0031047);cellular_component:chromatoid body(GO:0033391);biological_process:piRNA metabolic…
ENSG00000165863	-2.57197	-2.69284	0.516638	1	C10orf82	K15696	_
ENSG00000148704	-2.57197	-2.69284	0.516638	1	VAX1	K09318	biological_process:negative regulation of transcription from RNA polymerase II promoter(GO:0000122);molecular_function:transcription regulatory region sequence-specific DNA binding(GO:0000976);biological_process:neuron migration(GO:0001764);molecular_function:sequence-specific DNA binding transcription factor activity(GO:0003700);cellular_component:nucleus(GO:0005634);biological_process:transcrip…
ENSG00000226864	-2.57197	-2.69284	0.516638	1	ATE1-AS1	_	_
ENSG00000180066	-2.57197	-2.69284	0.516638	1	C10orf91	_	_
ENSG00000171794	-2.57197	-2.69284	0.516638	1	UTF1	_	molecular_function:transcription coactivator activity(GO:0003713);molecular_function:protein binding(GO:0005515);cellular_component:nucleus(GO:0005634);biological_process:transcription, DNA-templated(GO:0006351);biological_process:regulation of transcription from RNA polymerase II promoter(GO:0006357);biological_process:male gonad development(GO:0008584);biological_process:positive regulation of …
ENSG00000244734	-2.57197	-2.69284	0.516638	1	HBB	K13823	molecular_function:peroxidase activity(GO:0004601);molecular_function:oxygen transporter activity(GO:0005344);molecular_function:iron ion binding(GO:0005506);molecular_function:protein binding(GO:0005515);cellular_component:extracellular region(GO:0005576);cellular_component:cytosol(GO:0005829);cellular_component:hemoglobin complex(GO:0005833);biological_process:blood coagulation(GO:0007596);biol…
ENSG00000187747	-2.57197	-2.69284	0.516638	1	OR52B6	K04257	molecular_function:G-protein coupled receptor activity(GO:0004930);molecular_function:olfactory receptor activity(GO:0004984);cellular_component:plasma membrane(GO:0005886);cellular_component:integral component of membrane(GO:0016021)
ENSG00000189431	-2.57197	-2.69284	0.516638	1	RASSF10	K09856	cellular_component:spindle pole(GO:0000922);cellular_component:microtubule organizing center(GO:0005815);cellular_component:cytosol(GO:0005829);biological_process:signal transduction(GO:0007165)
ENSG00000129152	-2.57197	-2.69284	0.516638	1	MYOD1	K09064	biological_process:regulation of alternative mRNA splicing, via spliceosome(GO:0000381);cellular_component:nuclear chromatin(GO:0000790);molecular_function:RNA polymerase II distal enhancer sequence-specific DNA binding transcription factor activity(GO:0003705);molecular_function:transcription coactivator activity(GO:0003713);molecular_function:protein binding(GO:0005515);cellular_component:nucle…
ENSG00000187398	-2.57197	-2.69284	0.516638	1	LUZP2	_	cellular_component:extracellular region(GO:0005576)
ENSG00000176555	-2.57197	-2.69284	0.516638	1	OR4S1	K04257	molecular_function:G-protein coupled receptor activity(GO:0004930);molecular_function:olfactory receptor activity(GO:0004984);cellular_component:plasma membrane(GO:0005886);cellular_component:integral component of membrane(GO:0016021)
ENSG00000255532	-2.57197	-2.69284	0.516638	1	CTD-2026G22.1	_	_
ENSG00000181927	-2.57197	-2.69284	0.516638	1	OR4P4	K04257	molecular_function:G-protein coupled receptor activity(GO:0004930);molecular_function:olfactory receptor activity(GO:0004984);cellular_component:plasma membrane(GO:0005886);cellular_component:integral component of membrane(GO:0016021)
ENSG00000172487	-2.57197	-2.69284	0.516638	1	OR8J1	K04257	molecular_function:G-protein coupled receptor activity(GO:0004930);molecular_function:olfactory receptor activity(GO:0004984);cellular_component:plasma membrane(GO:0005886);cellular_component:integral component of membrane(GO:0016021)
ENSG00000172199	-2.57197	-2.69284	0.516638	1	OR8U1	K04257	molecular_function:G-protein coupled receptor activity(GO:0004930);molecular_function:olfactory receptor activity(GO:0004984);cellular_component:plasma membrane(GO:0005886);cellular_component:integral component of membrane(GO:0016021)
ENSG00000222998	-2.57197	-2.69284	0.516638	1	RN7SKP259	_	_
ENSG00000149507	-2.57197	-2.69284	0.516638	1	OOSP2	_	_
ENSG00000197658	-2.57197	-2.69284	0.516638	1	SLC22A24	K08206	biological_process:ion transport(GO:0006811);cellular_component:integral component of membrane(GO:0016021);molecular_function:transmembrane transporter activity(GO:0022857);biological_process:transmembrane transport(GO:0055085)
ENSG00000197891	-2.57197	-2.69284	0.516638	1	SLC22A12	K08208	cellular_component:plasma membrane(GO:0005886);molecular_function:urate transmembrane transporter activity(GO:0015143);biological_process:urate transport(GO:0015747);cellular_component:integral component of membrane(GO:0016021);cellular_component:apical plasma membrane(GO:0016324);biological_process:cellular homeostasis(GO:0019725);molecular_function:transmembrane transporter activity(GO:0022857)…
ENSG00000137673	-2.57197	-2.69284	0.516638	1	MMP7	K01397	biological_process:antibacterial peptide secretion(GO:0002779);molecular_function:metalloendopeptidase activity(GO:0004222);cellular_component:extracellular region(GO:0005576);cellular_component:proteinaceous extracellular matrix(GO:0005578);cellular_component:extracellular space(GO:0005615);biological_process:proteolysis(GO:0006508);molecular_function:zinc ion binding(GO:0008270);biological_proc…
ENSG00000198851	-2.57197	-2.69284	0.516638	1	CD3E	K06451	cellular_component:immunological synapse(GO:0001772);biological_process:positive regulation of T cell anergy(GO:0002669);molecular_function:transmembrane signaling receptor activity(GO:0004888);molecular_function:receptor signaling protein activity(GO:0005057);cellular_component:plasma membrane(GO:0005886);cellular_component:integral component of plasma membrane(GO:0005887);biological_process:pro…
ENSG00000151702	-2.57197	-2.69284	0.516638	1	FLI1	K09436	molecular_function:RNA polymerase II distal enhancer sequence-specific DNA binding(GO:0000980);molecular_function:DNA binding(GO:0003677);molecular_function:chromatin binding(GO:0003682);molecular_function:sequence-specific DNA binding transcription factor activity(GO:0003700);cellular_component:nucleus(GO:0005634);biological_process:transcription, DNA-templated(GO:0006351);biological_process:hem…
ENSG00000120471	-2.57197	-2.69284	0.516638	1	TP53AIP1	K13773	molecular_function:molecular_function(GO:0003674);cellular_component:mitochondrion(GO:0005739);biological_process:apoptotic process(GO:0006915)
ENSG00000173262	-2.57197	-2.69284	0.516638	1	SLC2A14	K12755	molecular_function:glucose transmembrane transporter activity(GO:0005355);biological_process:multicellular organismal development(GO:0007275);biological_process:spermatogenesis(GO:0007283);cellular_component:integral component of membrane(GO:0016021);molecular_function:transmembrane transporter activity(GO:0022857);molecular_function:substrate-specific transmembrane transporter activity(GO:002289…
ENSG00000177938	-2.57197	-2.69284	0.516638	1	CAPZA3	K10364	cellular_component:acrosomal vesicle(GO:0001669);molecular_function:actin binding(GO:0003779);biological_process:spermatid development(GO:0007286);cellular_component:F-actin capping protein complex(GO:0008290);cellular_component:membrane(GO:0016020);biological_process:actin cytoskeleton organization(GO:0030036);cellular_component:cortical cytoskeleton(GO:0030863);biological_process:actin filament…
ENSG00000139648	-2.57197	-2.69284	0.516638	1	KRT71	K07605	molecular_function:structural molecule activity(GO:0005198);biological_process:hair follicle morphogenesis(GO:0031069);cellular_component:keratin filament(GO:0045095)
ENSG00000172867	-2.57197	-2.69284	0.516638	1	KRT2	K07605	molecular_function:structural constituent of cytoskeleton(GO:0005200);cellular_component:cytoplasm(GO:0005737);cellular_component:Golgi apparatus(GO:0005794);cellular_component:intermediate filament(GO:0005882);biological_process:epidermis development(GO:0008544);biological_process:keratinization(GO:0031424);biological_process:keratinocyte activation(GO:0032980);biological_process:keratinocyte pr…
ENSG00000186442	-2.57197	-2.69284	0.516638	1	KRT3	K07605	molecular_function:structural molecule activity(GO:0005198);cellular_component:intermediate filament(GO:0005882);biological_process:cytoskeleton organization(GO:0007010);biological_process:epithelial cell differentiation(GO:0030855);cellular_component:keratin filament(GO:0045095);biological_process:intermediate filament cytoskeleton organization(GO:0045104)
ENSG00000170426	-2.57197	-2.69284	0.516638	1	SDR9C7	K11154	molecular_function:retinol dehydrogenase activity(GO:0004745);cellular_component:nucleolus(GO:0005730);cellular_component:cytoplasm(GO:0005737);biological_process:oxidation-reduction process(GO:0055114)
ENSG00000198812	-2.57197	-2.69284	0.516638	1	LRRC10	K17692	cellular_component:nucleus(GO:0005634);cellular_component:mitochondrion(GO:0005739);cellular_component:cytoskeleton(GO:0005856);cellular_component:myofibril(GO:0030016)
ENSG00000135643	-2.57197	-2.69284	0.516638	1	KCNMB4	K04941	biological_process:action potential(GO:0001508);biological_process:detection of calcium ion(GO:0005513);molecular_function:protein binding(GO:0005515);cellular_component:plasma membrane(GO:0005886);cellular_component:integral component of plasma membrane(GO:0005887);biological_process:potassium ion transport(GO:0006813);biological_process:synaptic transmission(GO:0007268);biological_process:blood…
ENSG00000258128	-2.57197	-2.69284	0.516638	1	MKRN9P	K15687	_
ENSG00000258102	-2.57197	-2.69284	0.516638	1	RP11-809C9.2	_	_
ENSG00000204583	-2.57197	-2.69284	0.516638	1	LRCOL1	_	_
ENSG00000072609	-2.57197	-2.69284	0.516638	1	CHFR	K10644	molecular_function:nucleotide binding(GO:0000166);biological_process:protein polyubiquitination(GO:0000209);biological_process:mitotic cell cycle(GO:0000278);molecular_function:ubiquitin-protein transferase activity(GO:0004842);molecular_function:protein binding(GO:0005515);cellular_component:nucleus(GO:0005634);biological_process:ubiquitin-dependent protein catabolic process(GO:0006511);biologic…
ENSG00000227059	-2.57197	-2.69284	0.516638	1	ANHX	_	molecular_function:sequence-specific DNA binding transcription factor activity(GO:0003700);cellular_component:nucleus(GO:0005634);molecular_function:sequence-specific DNA binding(GO:0043565)
ENSG00000240654	-2.57197	-2.69284	0.516638	1	C1QTNF9	_	molecular_function:hormone activity(GO:0005179);cellular_component:collagen trimer(GO:0005581)
ENSG00000133101	-2.57197	-2.69284	0.516638	1	CCNA1	K06627	biological_process:regulation of cyclin-dependent protein serine/threonine kinase activity(GO:0000079);biological_process:G1/S transition of mitotic cell cycle(GO:0000082);biological_process:regulation of transcription involved in G1/S transition of mitotic cell cycle(GO:0000083);biological_process:G2/M transition of mitotic cell cycle(GO:0000086);biological_process:mitotic cell cycle(GO:0000278)…
ENSG00000133115	-2.57197	-2.69284	0.516638	1	STOML3	K17286	cellular_component:plasma membrane(GO:0005886);cellular_component:cilium(GO:0005929);biological_process:signal transduction(GO:0007165);cellular_component:integral component of membrane(GO:0016021);cellular_component:membrane raft(GO:0045121)
ENSG00000257884	-2.57197	-2.69284	0.516638	1	RP11-597A11.4	K11841	_
ENSG00000176299	-2.57197	-2.69284	0.516638	1	OR4M1	K04257	molecular_function:G-protein coupled receptor activity(GO:0004930);molecular_function:olfactory receptor activity(GO:0004984);cellular_component:plasma membrane(GO:0005886);cellular_component:integral component of membrane(GO:0016021)
ENSG00000155249	-2.57197	-2.69284	0.516638	1	OR4K1	K04257	molecular_function:G-protein coupled receptor activity(GO:0004930);molecular_function:olfactory receptor activity(GO:0004984);cellular_component:plasma membrane(GO:0005886);cellular_component:integral component of membrane(GO:0016021)
ENSG00000100968	-2.57197	-2.69284	0.516638	1	NFATC4	K17334	molecular_function:sequence-specific DNA binding RNA polymerase II transcription factor activity(GO:0000981);biological_process:patterning of blood vessels(GO:0001569);molecular_function:DNA binding(GO:0003677);molecular_function:sequence-specific DNA binding transcription factor activity(GO:0003700);molecular_function:transcription coactivator activity(GO:0003713);cellular_component:nucleus(GO:0…
ENSG00000258098	-2.57197	-2.69284	0.516638	1	RP11-89K22.1	_	_
[truncated: 56,013 more rows]
